# Supplementary material for: Association of holidays and the day of the week with suicide risk: multicountry, two stage, time series study
Source: PubMed Central journal article supplement — BMJ. 2024 Oct 23;387:e077262. doi: 10.1136/bmj-2024-077262 (PMC11497772; doi:10.1136/bmj-2024-077262), 2024-10-23
Supplement: leew077262.ww.pdf [file leew077262.ww.pdf]

## Supplementary Materials

**Title:** Association of holidays and the day-of-the week with suicide risk: multicountry, two stage, time series study

Whanhee Lee, *assistant professor*<sup>1\*</sup>, Cino Kang, *doctoral student*<sup>2\*</sup>, Chaerin Park, *researcher*<sup>2</sup>, Michelle L. Bell, *professor*<sup>3,4</sup>, Ben Armstrong, *professor*<sup>5</sup>, Dominic Roye, *senior researcher*<sup>6</sup>, Masahiro Hashizume, *professor*<sup>7</sup>, Antonio Gasparrini, *professor*<sup>8</sup>, Aurelio Tobias, *associate research professor*<sup>9,10</sup>, Francesco Sera, *associate professor*<sup>11</sup>, Yasushi Honda, *professor emeritus*<sup>12</sup>, Aleš Urban, *research scientist*<sup>13,14</sup>, Jan Kysely, *associate professor*<sup>13,14</sup>, Carmen Íñiguez, *senior reseearcher*<sup>15</sup>, Niilo Rytty, *adjunct professor*<sup>16, 17</sup>, Yuming Guo, *professor*<sup>18</sup>, Shilu Tong, *professor*<sup>19,20</sup>, Micheline de Sousa Zanotti Stagliorio Coelho, *reseearcher*<sup>21,22</sup>, Eric Lavigne, *adjunct professor*<sup>23,24</sup>, Francesca de'Donato, *senior researcher*<sup>25</sup>, Yue Leon Guo, *professor*<sup>26</sup>, Joel Schwartz, *professor*<sup>27</sup>, Alexandra Schneider, *senior scientist*<sup>28</sup>, Susanne Breitner, *senior scientist*<sup>28,29</sup>, Yeonseung Chung, *associate professor*<sup>30</sup>, Sooin Kim, *professor*<sup>31</sup>, Eunhee Ha, *professor*<sup>32,33,34</sup>, Ho Kim, *professor*<sup>2</sup>, Yoonhee Kim (ORCID: 0000-0003-2517-1087), *associate professor*<sup>35</sup>, on behalf of the Multi-City Multi-Country (MCC) Collaborative Research Network

\*Whanhee Lee and Cino Kang contributed equally to this research as co-first authors.

<sup>1</sup>School of Biomedical Convergence Engineering, College of Information and Biomedical Engineering, Pusan National University, Yangsan, Republic of Korea

<sup>2</sup>Department of Public Health Science, Graduate School of Public Health, Seoul National University, Seoul, Republic of Korea

<sup>3</sup>School of the Environment, Yale University, New Haven, CT, USA

<sup>4</sup>Interdisciplinary Program in Precision Public Health, Department of Public Health Sciences, Graduate School of Korea University, Seoul, Republic of Korea

<sup>5</sup>Department of Public Health Environments and Society, London School of Hygiene & Tropical Medicine, London, UK

<sup>6</sup>Climate Research Foundation, Madrid, Spain, Spanish and Consortium for Research on Epidemiology and Public Health (CIBERESP), Spain

<sup>7</sup>Department of Global Health Policy, Graduate School of Medicine, University of Tokyo, Tokyo, Japan

<sup>8</sup>Environment and Health Modeling (EHM) Lab, London School of Hygiene & Tropical Medicine, London, UK

<sup>9</sup>Institute of Environmental Assessment and Water Research, IDAEA, Spanish Council for Scientific Research, CSIC, Barcelona, Spain

<sup>10</sup>School of Tropical Medicine and Global Health, Nagasaki University, Nagasaki, Japan

<sup>11</sup>Department of Statistics, Computer Science and Applications “G. Parenti”, University of Florence, Florence, Italy

<sup>12</sup>Faculty of Health and Sport Sciences, University of Tsukuba, Tsukuba, Japan

<sup>13</sup>Institute of Atmospheric Physics, Czech Academy of Sciences, Prague, Czech Republic

<sup>14</sup>Faculty of Environmental Sciences, Czech University of Life Sciences, Prague, Czech Republic

<sup>15</sup>Department of Statistics and Computational Research, Universitat de València, València, Spain

<sup>16</sup>Center for Environmental and Respiratory Health Research (CERH), University of Oulu, Oulu, Finland

<sup>17</sup>Department of Public Health, University of Helsinki, Helsinki, Finland

<sup>18</sup>Climate, Air Quality Research Unit, School of Public Health and Preventive Medicine, Monash University, Melbourne, VIC, Australia

<sup>19</sup>National Institute of Environmental Health, Chinese Center for Disease Control and Prevention, Beijing, China

- <sup>20</sup>School of Public Health and Social Work, Queensland University of Technology, Brisbane, QLD, Australia
- <sup>21</sup>Laboratory of Urban Health, Faculty of Medicine of the University of São Paulo/INSPIER, Brazil
- <sup>22</sup>International University Health Science, University of Medicine, Basseterre, St Kitts and Nevis
- <sup>23</sup>School of Epidemiology and Public Health, Faculty of Medicine, University of Ottawa, Ottawa, ON, Canada
- <sup>24</sup>Environmental Health Science and Research Bureau, Health Canada, Ottawa, Canada
- <sup>25</sup>Department of Epidemiology, Lazio Regional Health Service ASL Roma 1, Rome, Italy
- <sup>26</sup>Environmental and Occupational Medicine, and Institute of Environmental and Occupational Health Sciences, National Taiwan University (NTU) and NTU Hospital, Taipei, Taiwan
- <sup>27</sup>Department of Environmental Health, Harvard T.H. Chan School of Public Health, Boston, MA, USA
- <sup>28</sup>Institute of Epidemiology, Helmholtz Zentrum München—German Research Center for Environmental Health (GmbH), Neuherberg, Germany
- <sup>29</sup>Chair of Epidemiology, IBE, Faculty of Medicine, LMU Munich, Munich, Germany
- <sup>30</sup>Department of Mathematical Sciences, Korea Advanced Institute of Science and Technology, Daejeon, Republic of Korea
- <sup>31</sup>Department of Psychiatry, Ewha Womans University Mokdong Hospital, Ewha Womans University College of Medicine, Seoul, Republic of Korea
- <sup>32</sup>Department of Environmental Medicine, College of Medicine, Ewha Womans University, Seoul, Republic of Korea
- <sup>33</sup>Institute of Ewha-SCL for Environmental Health (IESEH), College of Medicine, Ewha Womans University, Seoul, Republic of Korea
- <sup>34</sup>System Health & Engineering Major in Graduate School (BK21 Plus Program), Ewha Womans University, Seoul the Republic of Korea.
- <sup>35</sup>Department of Global Environmental Health, Graduate School of Medicine, University of Tokyo, Tokyo, Japan

**Corresponding author:** Yoonhee Kim. Department of Global Environmental Health, Graduate School of Medicine, The University of Tokyo, Tokyo, Japan. 7-3-1 Hongo, Bunkyo-ku, Tokyo 113-0033, Japan. E-mail: [yooneekim@m.u-tokyo.ac.jp](mailto:yooneekim@m.u-tokyo.ac.jp)

## **Data Collection Details**

See the full list of cities included for each country in Table S1 if further information is needed. All data described below have been collected within the MCC (Multi-City Multi-Country) Collaborative Research Network (<https://mccstudy.lshtm.ac.uk/>) under a data sharing agreement and cannot be made publicly available.

### **Canada (26 cities, 1986-2015)**

We collected data from 26 cities from 1 January 1986 to 31 December 2015. Daily suicide counts were obtained from Statistics Canada. Daily mean temperature (°C) was obtained from Environment Canada.

### **United States (134 cities, 2001-2006)**

We collected data from 135 cities from 1 January 2001 to 31 December 2006 and excluded Honolulu with no suicide in the study period. A total of 134 cities were included in our study. Daily suicide counts were obtained from the National Center for Health Statistics. Daily mean temperature (°C) was obtained from the National Climate Data Center (NCDC) of the National Oceanic and Atmospheric Administration (NOAA).

### **Costa Rica (1 city, 2000-2017)**

We collected data from 1 city (San Jose) from 1 January 2000 to 31 December 2017. Daily suicide counts were provided from the Instituto Nacional de Estadística y Censo [Open Access]. Daily mean temperature (°C) was obtained from WMO-NOAA (Surface Data Hourly Global, DS3505).

### **Guatemala (1 city, 2009-2018)**

We collected data from 1 city (Guatemala) from 1 January 2009 to 31 December 2018. Daily suicide counts were provided from the Instituto Nacional de Estadística, Unidad de Estadística de Salud. Daily mean temperature (°C) was obtained from the Instituto Nacional de Sismología, Vulcanología, Meteorología y Hidrología.

### **Mexico (10 cities, 1998-2014)**

We collected data from 10 cities from 1 January 1998 to 31 December 2014. Daily suicide counts were provided from the National Institute of Statistics, Geography and Informatics. Daily mean temperature (°C) was obtained from the Servicio Meteorológico Nacional (SMN) and the Instituto Nacional de Ecología y Cambio Climático (INECC).

### **Brazil (15 cities, 2000-2019)**

We collected data from 15 cities from 1 January 2000 to 31 December 2019. Daily suicide counts were obtained from the Ministry of Health, Brazil. Daily mean temperature (°C) was obtained from the National Institute of Meteorology of Brazil.

### **Chile (1 city, 2008-2014)**

We collected data from 1 city (Santiago) from 1 January 2008 to 31 December 2014. Daily suicide counts were obtained from Departamento de Estadísticas e Información en Salud. Daily mean temperature (°C) was obtained from Sistema Informático de Calidad del Aire.

### **Ecuador (2 cities, 2013-2019)**

We collected data from 2 cities (Guayaquil and Quito) from 1 January 2013 to 31 December 2019. Daily suicide counts were derived from Instituto Nacional de Estadística y Censo [Open Access]. Daily mean temperature (°C) was obtained from WMO-NOAA (Surface Data Hourly Global, DS3505).

### **Paraguay (1 city, 2004-2019)**

We collected data from 1 city (Asuncion) from 1 January 2004 to 31 December 2019. Daily suicide counts were provided from the Ministerio de Salud Pública y Bienestar Social, Dirección General de Información Estratégica

en Salud, Subsistema de Información de Estadísticas Vitales. Daily mean temperature (°C) was obtained from the Global Historical Climatology Network (NOAA/WMO).

**Australia (5 cities, 2009-2018)**

We collected data from 5 cities from 1 January 2009 to 31 December 2018. Daily suicide counts were obtained from the Australian Bureau of Statistics. Daily mean temperature was obtained from the Australian Bureau of Meteorology.

**South Africa (52 districts, 1997-2013)**

We collected data from 52 districts from 1 January 1997 to 31 December 2013. Daily suicide counts were kindly supplied by Statistics South Africa, who had no role in the data analysis or interpretation. It is likely that the suicide data was underreported. Daily mean temperature was obtained from the Agricultural Research Council of South Africa and the National Oceanographic and Atmospheric Association (NOAA) of the United States; the latter was also the source of the daily total of sunshine duration.

**China (1 city, 2015-2019)**

We collected data from 1 city (Suzhou) from 1 January 2015 to 31 December 2019. Daily suicide counts were provided from Suzhou Center for Disease Control and Prevention. Daily mean temperature (°C) was obtained from Suzhou Bureau of Meteorology.

**Japan (47 prefectures, 1973-2019)**

We collected data from 47 prefectures from 1 January 1973 to 31 December 2019. Daily suicide counts were obtained from the Ministry of Health, Labour and Welfare, Japan. Daily mean temperature and the daily total of sunshine duration were obtained from the Japan Meteorological Agency.

**South Korea (36 cities, 1997-2019)**

We collected data from 36 cities from 1 January 1997 to 31 December 2019. Daily suicide counts were obtained from the Microdata Integrated Service (MDIS), administered by Statistics Korea in South Korea. Daily mean temperature and relative humidity and the daily total of sunshine duration were obtained from the Korea Meteorological Administration.

**Philippines (8 cities, 2006-2019)**

We collected data from 8 cities from 1 January 2006 to 31 December 2019. Daily suicide counts were provided from the Philippine Statistics Agency. Daily mean temperature (°C) was obtained from the Philippine Atmospheric, Geophysical and Astronomical Services Administration.

**Taiwan (3 cities, 1994-2014)**

We collected data from 3 cities from 1 January 1994 to 31 December 2014. Daily suicide counts were obtained from the Department of Statistics, Ministry of Health and Welfare in Taiwan. Daily mean temperature, relative humidity, and the daily total of sunshine duration were obtained from the Taiwan Environmental Protection Administration.

**Vietnam (1 city, 2010-2013)**

We collected data from 1 city (Ho Chi Minh) from 1 January 2010 to 31 December 2013. Daily suicide counts were obtained from national mortality system collected at community namely A6. Daily mean temperature (°C) was obtained from the Tan Son Nhat airport weather station, Ho Chi Minh City.

**Czech Republic (3 cities, 2003-2019)**

We collected data from 3 cities (Brno, Ostrava, and Prague) from 1 January 2003 to 31 December 2019. Daily suicide counts were provided from the Czech Statistical Office and the Institute of Health Information and Statistics. Daily mean temperature (°C) was obtained from the Czech Hydrometeorological Institute.

**Estonia (5 cities, 2005-2015)**

We collected data from 5 cities (Kohtla-Järve linn, Narva linn, Pärnu linn, Tallinn, and Tartu linn) from 1 January 2005 to 31 December 2015. Daily suicide counts were obtained from the Estonian Causes of Death Registry. Daily mean temperature (°C) was computed as the 24-h average of hourly measurements collected from Estonian Environment Agency. A single weather station located nearby the urban area was selected for each city.

**Finland (310 municipalities, 1971-2018)**

We collected data from 310 municipalities (Kunta) from 1 January 1971 to 31 December 2018. The full list of cities is presented in Table S1. Daily suicide counts were provided from Statistics Finland. Daily mean temperature (°C) was obtained from the Finnish Meteorological Institute (FMI).

**Germany (1 city, 1990-2006)**

We collected data from 1 city (Munich) from 1 January 1990 to 31 December 2006. Daily suicide counts were obtained from the Bavarian State Office for Statistics and Data Processing. Daily mean temperature (°C) was obtained from German Weather Service (DWD).

**Italy (1 city, 2006-2015)**

We collected data from 1 city (Rome) from 1 January 2006 to 31 December 2015. Daily suicide counts were obtained from Lazio regional mortality registry (ReNCaM). Daily mean temperature (°C) was obtained from Ciampino airport were obtained from the Italian Air Force Meteorological and Climatological Service (CNMCA).

**Romania (8 cities, 1999-2016)**

We collected data from 8 cities from 1 January 1999 to 31 December 2016. Daily suicide data were provided by the National Institute for Statistics (NIS). Daily mean temperature was obtained from Romanian National Meteorological Administration (RNMA) and the daily total of sunshine duration were obtained from ROCADA 10 km resolution gridded dataset.

**Spain (50 cities, 1990-2013)**

We collected data from 52 provincial capital cities from 1 January 1990 to 31 December 2013 and excluded two cities (Palencia with no temperature data since 1991 and Ceuta with no temperature data before 2003). A total of 50 cities were included in our study. Daily suicide counts were obtained from Spain National Institute of Statistics. Daily mean temperature and the daily total of sunshine duration were obtained from Spain National Meteorology Agency.

**Switzerland (8 cantons, 1978-2016)**

We collected data from 8 regions (cantons) from 1 January 1978 to 31 December 2016. Daily suicide counts were obtained from the Federal Office of Statistics. The suicide data includes in part assisted suicide from 1978 to 2008. Daily mean temperature, relative humidity, and the daily total of sunshine duration were collected from the IDAWEB web database (a service provided by MeteoSwiss, the Swiss Federal Office of Meteorology and Climatology, MeteoSwiss). A single weather station within each canton was selected (Basel-Stadt: Basel/Binningen; Berne: Berne/Zollikofen; Geneva: Genève/Cointrin; Ticino: Lugano; Lucerne: Lucerne; Vaud: Pully; St. Gallen: St. Gallen; Zurich: Zurich/Fluntern).

**United Kingdom (10 regions, 2001-2014)**

We collected data from 10 regions in England and Wales from 1 January 2001 to 31 December 2014. Daily suicide counts were obtained from the Office of National Statistics. Daily mean temperature and the daily total of sunshine duration were obtained from the British Atmospheric Data Centre.

**Figure. Time-series scatter plots.** Black dots show the actual suicide data points, and the red lines indicate the seasonality and long-term pattern captured by natural cubic spline functions (the detailed information on the modelling is described in the Method section)

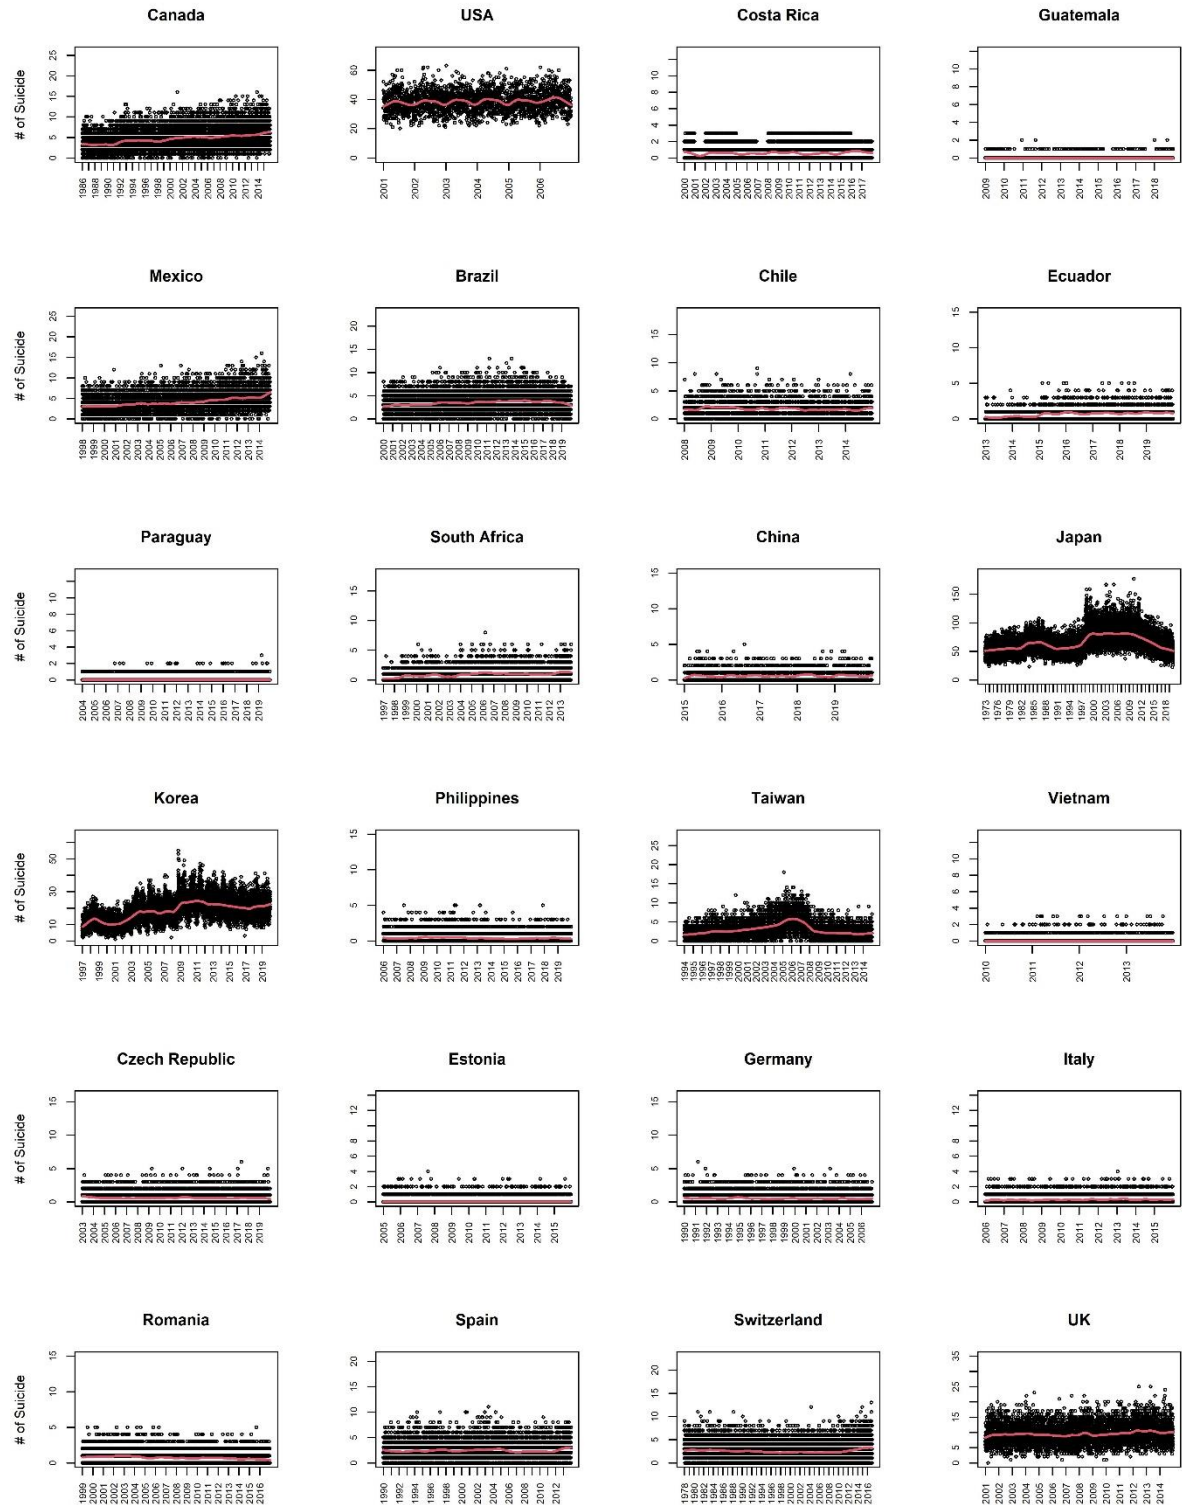

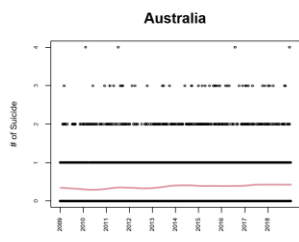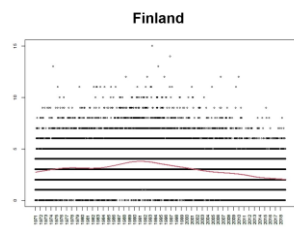

## Details on Statistical Analysis

This study adopted a standardized two-stage analytic approach incorporating a time-series analysis and meta-regression. In the first stage, we fitted a generalized linear model with Poisson distribution (for count response variable) to estimate the impacts of the day-of-the-week and national holidays on suicide risk, concurrently. As predictors, we added an indicator variable for the day-of-the-week with Wed as a reference point, and indicator variables for national holidays and their neighboring days (before two to after two days) for each type of holiday: New Year's Day, Christmas, and all other national holidays. For example, we did one-hot encoding (1 and 0) for two-day before New Year's Day, one day before New Year's Day, New Year's Day, one-day after New Year's Day, and two-day after New Year's Day, respectively, and did the same procedures for other two types of holidays (Christmas and other national holidays, individually). This approach is statistically equivalent to an unconstrained distributed lag model.<sup>1</sup> And we put these one-hot encoding indicator variables and the day-of-the-week indicator variable concurrently in the regression model to estimate conditional estimates (i.e. adjust each other).

Further, in order to control the confounding effect from ambient temperatures, we adjusted the for the suicide count-weighted (to address spatial heterogeneity and different suicide population sizes of different locations in a certain country) daily mean temperature using a cross-basis function with a quadratic B-spline, with three internal knots placed at the 25<sup>th</sup>, 50<sup>th</sup>, and 75<sup>th</sup> percentiles of the country-specific temperature distribution. For the lag-response association for temperature, we used dummy parameterization-defining intervals with lag 0 and lag 1-2. The modeling choices for temperature were based on the previous MCC study for the ambient temperature-suicide association that conducted relevant statistical tests with various lag days and modeling specifications.<sup>2</sup>

Also, in order to control the seasonality and long-term trend, which can confound the associations for suicide with the day-of-the-week and holidays, a natural cubic spline of time (date) with four degrees of freedom per year. The selection of degrees of freedom (df) was also selected based on statistical tests (df with the lowest AIC).<sup>2</sup>

Therefore, the final regression model at the first-stage analysis included indicator variables for the day-of-the-week and holidays, a cross-basis function of weighted temperature (temperature impacts adjusted), and a natural cubic spline of time (seasonality and long-term trend adjusted). We performed the regression model for each country and collected the estimates (i.e. regression coefficients) for the day-of-the-week (reference: Wed) and estimates for each type of holiday (reference: the days other than the 5-day period for each holiday type) with the corresponding variance-covariance matrix.

In the second stage, we did a meta-regression to pool the estimates from the first-stage regression. We pooled the estimates for the day-of-the-week, the estimates for Christmas and neighboring days (-2 to 2 days), the estimates for New Year's Day and neighboring days, and the estimates for other national holidays and their neighboring days with the corresponding 95% confidence intervals, using a separate meta-regression with a "region" indicator (North America, Central America, South America, Europe, Africa & Oceania, and Asia) to reduce the heterogeneities of the first-stage estimates (see Table S5). The pooled results are the results on the "total" population in Figure 2-5. Then, we calculated BLUP (Best Linear Unbiased Predictions) from each meta-regression to compute country-specific estimates and their 95% confidence intervals. The estimates are displayed in Figure 2-5 as "country-specific" relative risks.

Finally, in order to examine the difference between males and females, and the difference between people aged less than 64 and people aged 65 or older, we repeated the aforementioned analytic procedures for each sub-population (males, females, people aged less than 64, and people aged 65 or older, individually). However, due to the convergence problem in a generalized linear model (i.e. due to the small counts), we could not get estimates on holidays for people aged 65 or older in the first-stage analysis in many locations. Therefore, we were not able to provide the pooled estimates for the elderly population.



## Supplementary results

**Table S1.** Summary statistics for the number of suicides for 740 locations in 26 countries.

| Location                | Country       | Study period | Total number of suicides | Total number of male suicides (%) | Total number of non-elderly suicides (%) |
|-------------------------|---------------|--------------|--------------------------|-----------------------------------|------------------------------------------|
| Vancouver               | Canada        | 1986-2015    | 5405                     | 74.4                              | 84.1                                     |
| Victoria                | Canada        | 1986-2015    | 1094                     | 73.2                              | 78.6                                     |
| Abbotsford              | Canada        | 1986-2015    | 710                      | 78.3                              | 84.9                                     |
| Edmonton                | Canada        | 1986-2015    | 4530                     | 74.5                              | 91.0                                     |
| Calgary                 | Canada        | 1986-2015    | 3767                     | 76.4                              | 90.8                                     |
| Saskatoon               | Canada        | 1986-2015    | 943                      | 76.7                              | 90.7                                     |
| Regina                  | Canada        | 1986-2015    | 847                      | 77.8                              | 90.0                                     |
| Winnipeg                | Canada        | 1986-2015    | 2693                     | 71.1                              | 88.0                                     |
| Kitchener - Waterloo    | Canada        | 1986-2015    | 1069                     | 75.5                              | 86.4                                     |
| Toronto                 | Canada        | 1986-2015    | 10437                    | 71.8                              | 84.7                                     |
| Thunder bay             | Canada        | 1986-2015    | 666                      | 78.5                              | 86.6                                     |
| Sudbury                 | Canada        | 1986-2015    | 768                      | 79.9                              | 84.8                                     |
| Windsor                 | Canada        | 1986-2015    | 990                      | 78.0                              | 85.8                                     |
| London                  | Canada        | 1986-2015    | 1186                     | 73.9                              | 86.9                                     |
| Kingston                | Canada        | 1986-2015    | 649                      | 80.9                              | 86.7                                     |
| Hamilton                | Canada        | 1986-2015    | 1212                     | 75.7                              | 86.4                                     |
| Ottawa                  | Canada        | 1986-2015    | 2297                     | 74.2                              | 88.0                                     |
| Montreal                | Canada        | 1986-2015    | 6134                     | 72.8                              | 88.3                                     |
| Saint_john_NB           | Canada        | 1986-2015    | 579                      | 81.0                              | 86.9                                     |
| Halifax                 | Canada        | 1986-2015    | 1146                     | 78.8                              | 88.2                                     |
| St_john_NFL             | Canada        | 1986-2015    | 629                      | 81.2                              | 88.6                                     |
| Oakville                | Canada        | 1986-2015    | 899                      | 72.5                              | 85.3                                     |
| Oshawa                  | Canada        | 1986-2015    | 1134                     | 77.2                              | 88.4                                     |
| Sault_Ste_Marie         | Canada        | 1986-2015    | 433                      | 78.1                              | 82.2                                     |
| Sarnia                  | Canada        | 1986-2015    | 392                      | 81.1                              | 84.9                                     |
| Niagara                 | Canada        | 1986-2015    | 1258                     | 77.1                              | 83.5                                     |
| Akron, OH               | United States | 2001-2006    | 367                      | 76.3                              | 83.7                                     |
| Albuquerque, NM         | United States | 2001-2006    | 620                      | 79.5                              | 84.7                                     |
| Allentown-Bethlehem, PA | United States | 2001-2006    | 227                      | 81.5                              | 85.9                                     |
| Atlanta, GA             | United States | 2001-2006    | 1603                     | 78.5                              | 88.0                                     |
| Atlantic City, NJ       | United States | 2001-2006    | 134                      | 78.4                              | 83.6                                     |
| Austin, TX              | United States | 2001-2006    | 605                      | 73.1                              | 87.4                                     |
| Bakersfield, CA         | United States | 2001-2006    | 419                      | 79.2                              | 82.1                                     |

|                                |               |           |      |      |      |
|--------------------------------|---------------|-----------|------|------|------|
| Baltimore, MD                  | United States | 2001-2006 | 731  | 81.5 | 83.7 |
| Barnstable-Yarmouth, MA        | United States | 2001-2006 | 120  | 77.5 | 82.5 |
| Bergen-Passaic, NJ             | United States | 2001-2006 | 474  | 76.8 | 77.8 |
| Birmingham, AL                 | United States | 2001-2006 | 649  | 80.7 | 82.0 |
| Boston, MA                     | United States | 2001-2006 | 957  | 74.8 | 86.1 |
| Baton Rouge, LA                | United States | 2001-2006 | 221  | 81.0 | 86.4 |
| Brownsville, TX                | United States | 2001-2006 | 116  | 79.3 | 67.2 |
| Buffalo, NY                    | United States | 2001-2006 | 381  | 88.5 | 84.3 |
| Canton-Massillon, OH           | United States | 2001-2006 | 213  | 80.3 | 79.8 |
| Charleston, WV                 | United States | 2001-2006 | 173  | 79.2 | 85.0 |
| Charlotte, NC                  | United States | 2001-2006 | 420  | 78.1 | 86.4 |
| Chattanooga, TN                | United States | 2001-2006 | 206  | 77.7 | 85.4 |
| Chicago, IL                    | United States | 2001-2006 | 2886 | 78.3 | 85.2 |
| Cincinnati, OH                 | United States | 2001-2006 | 513  | 76.2 | 82.7 |
| Cleveland, OH                  | United States | 2001-2006 | 1197 | 79.2 | 82.0 |
| Columbia, SC                   | United States | 2001-2006 | 326  | 77.9 | 85.9 |
| Columbus, OH                   | United States | 2001-2006 | 658  | 79.0 | 89.1 |
| Dallas, TX                     | United States | 2001-2006 | 1263 | 76.7 | 87.3 |
| Daytona Beach, FL              | United States | 2001-2006 | 537  | 74.9 | 69.8 |
| Dayton, OH                     | United States | 2001-2006 | 395  | 77.2 | 84.3 |
| Denver, CO                     | United States | 2001-2006 | 1419 | 74.9 | 87.9 |
| Des Moines, IA                 | United States | 2001-2006 | 263  | 78.3 | 87.5 |
| Detroit, MI                    | United States | 2001-2006 | 2386 | 79.2 | 86.8 |
| Dutchess County, NY            | United States | 2001-2006 | 96   | 83.3 | 86.5 |
| El Paso, TX                    | United States | 2001-2006 | 291  | 81.8 | 81.1 |
| Erie, PA                       | United States | 2001-2006 | 158  | 86.7 | 84.8 |
| Flint, MI                      | United States | 2001-2006 | 287  | 78.0 | 84.7 |
| Fresno, CA                     | United States | 2001-2006 | 436  | 82.8 | 85.1 |
| Ft. Lauderdale, FL             | United States | 2001-2006 | 1267 | 73.8 | 81.7 |
| Fort Myers-Cape Coral, FL      | United States | 2001-2006 | 494  | 76.3 | 74.7 |
| Fort Pierce-Port St. Lucie, FL | United States | 2001-2006 | 327  | 79.2 | 73.4 |
| Fort Worth-Arlington, TX       | United States | 2001-2006 | 917  | 77.8 | 89.4 |
| Galveston, TX                  | United States | 2001-2006 | 208  | 79.3 | 87.5 |
| Gary, IN                       | United States | 2001-2006 | 274  | 82.5 | 88.0 |
| Grand Rapids, MI               | United States | 2001-2006 | 292  | 78.4 | 89.4 |
| Greensboro, NC                 | United States | 2001-2006 | 269  | 72.9 | 85.1 |
| Greenville, SC                 | United States | 2001-2006 | 303  | 74.9 | 88.4 |
| Hamilton, OH                   | United States | 2001-2006 | 227  | 78.0 | 85.9 |
| Harrisburg-Carlisle, PA        | United States | 2001-2006 | 140  | 81.4 | 86.4 |

|                                   |               |           |      |      |      |
|-----------------------------------|---------------|-----------|------|------|------|
| Hartford, CT                      | United States | 2001-2006 | 393  | 79.1 | 84.2 |
| Houston, TX                       | United States | 2001-2006 | 2072 | 76.5 | 87.5 |
| Indianapolis, IN                  | United States | 2001-2006 | 618  | 79.3 | 89.5 |
| Jacksonville, FL                  | United States | 2001-2006 | 674  | 77.2 | 85.6 |
| Jersey City, NJ                   | United States | 2001-2006 | 162  | 82.7 | 82.1 |
| Kansas City, MO-KS                | United States | 2001-2006 | 1077 | 79.0 | 84.9 |
| Knoxville, TN                     | United States | 2001-2006 | 410  | 80.5 | 80.5 |
| Lakeland-Winter Haven, FL         | United States | 2001-2006 | 389  | 76.6 | 79.2 |
| Lancaster, PA                     | United States | 2001-2006 | 250  | 85.2 | 87.6 |
| Lansing, MI                       | United States | 2001-2006 | 145  | 74.5 | 89.7 |
| Las Vegas, NV-AZ                  | United States | 2001-2006 | 1891 | 79.0 | 79.3 |
| Los Angeles, CA                   | United States | 2001-2006 | 4167 | 77.8 | 80.9 |
| Louisville, KY                    | United States | 2001-2006 | 525  | 78.7 | 85.5 |
| Little Rock, AR                   | United States | 2001-2006 | 272  | 80.9 | 90.8 |
| Lubbock, TX                       | United States | 2001-2006 | 172  | 77.3 | 84.3 |
| Madison, WI                       | United States | 2001-2006 | 300  | 76.7 | 89.0 |
| McAllen-Edinburg-Mission, TX      | United States | 2001-2006 | 176  | 86.4 | 80.1 |
| Melbourne-Titusville-Palm Bay, FL | United States | 2001-2006 | 542  | 75.3 | 76.2 |
| Memphis, TN                       | United States | 2001-2006 | 519  | 80.9 | 83.0 |
| Miami, FL                         | United States | 2001-2006 | 1207 | 81.2 | 71.2 |
| Middlesex, NJ                     | United States | 2001-2006 | 244  | 74.6 | 87.7 |
| Milwaukee, WI                     | United States | 2001-2006 | 784  | 77.7 | 86.6 |
| Minneapolis-St. Paul, MN          | United States | 2001-2006 | 887  | 77.7 | 86.2 |
| Mobile, AL                        | United States | 2001-2006 | 233  | 79.8 | 88.4 |
| Monmouth-Ocean, NJ                | United States | 2001-2006 | 515  | 80.8 | 80.0 |
| Myrtle Beach, SC                  | United States | 2001-2006 | 186  | 79.0 | 83.9 |
| Naples, FL                        | United States | 2001-2006 | 210  | 82.9 | 72.4 |
| Nashua, NH                        | United States | 2001-2006 | 237  | 75.9 | 93.2 |
| Nashville, TN                     | United States | 2001-2006 | 458  | 77.7 | 85.8 |
| Nassau-Suffolk, NY                | United States | 2001-2006 | 827  | 82.5 | 84.3 |
| Newark, NJ                        | United States | 2001-2006 | 393  | 81.4 | 78.4 |
| Newburgh, NY                      | United States | 2001-2006 | 125  | 84.0 | 81.6 |
| New Haven-Meriden, CT             | United States | 2001-2006 | 398  | 78.4 | 85.2 |
| New London, CT                    | United States | 2001-2006 | 151  | 76.2 | 86.8 |
| New York, NY                      | United States | 2001-2006 | 2642 | 74.0 | 82.5 |
| Oakland, CA                       | United States | 2001-2006 | 1184 | 74.7 | 78.8 |
| Ocala, FL                         | United States | 2001-2006 | 302  | 75.8 | 69.2 |
| Oklahoma City, OK                 | United States | 2001-2006 | 570  | 77.4 | 87.5 |
| Omaha, NE                         | United States | 2001-2006 | 277  | 81.6 | 85.9 |

|                                      |               |           |      |      |      |
|--------------------------------------|---------------|-----------|------|------|------|
| Orange County, CA                    | United States | 2001-2006 | 1376 | 74.3 | 81.2 |
| Orlando, FL                          | United States | 2001-2006 | 851  | 76.1 | 85.2 |
| Pensacola, FL                        | United States | 2001-2006 | 239  | 77.0 | 82.0 |
| Philadelphia, PA-NJ                  | United States | 2001-2006 | 2580 | 78.6 | 85.8 |
| Phoenix, AZ                          | United States | 2001-2006 | 2744 | 79.4 | 83.2 |
| Pittsburgh, PA                       | United States | 2001-2006 | 868  | 80.3 | 83.1 |
| Portland, ME                         | United States | 2001-2006 | 165  | 78.2 | 88.5 |
| Portland, OR                         | United States | 2001-2006 | 1132 | 77.0 | 86.6 |
| Providence-Fall River, RI-MA         | United States | 2001-2006 | 116  | 81.0 | 83.6 |
| Punta Gorda, FL                      | United States | 2001-2006 | 160  | 76.3 | 71.3 |
| Raleigh, NC                          | United States | 2001-2006 | 337  | 73.0 | 85.2 |
| Reading, PA                          | United States | 2001-2006 | 271  | 82.7 | 80.4 |
| Riverside-San Bernardino, CA         | United States | 2001-2006 | 2037 | 79.7 | 80.5 |
| Rochester, NY                        | United States | 2001-2006 | 277  | 81.2 | 83.4 |
| Rockford, IL                         | United States | 2001-2006 | 173  | 77.5 | 86.1 |
| Sacramento, CA                       | United States | 2001-2006 | 917  | 76.8 | 84.5 |
| Saginaw, MI                          | United States | 2001-2006 | 125  | 83.2 | 85.6 |
| Salinas, CA                          | United States | 2001-2006 | 201  | 74.1 | 79.6 |
| Salt Lake City, UT                   | United States | 2001-2006 | 805  | 80.5 | 90.7 |
| San Antonio, TX                      | United States | 2001-2006 | 870  | 78.9 | 86.8 |
| Sarasota-Bradenton, FL               | United States | 2001-2006 | 594  | 75.4 | 72.7 |
| Scranton--Wilkes-Barre--Hazleton, PA | United States | 2001-2006 | 435  | 81.8 | 87.6 |
| San Diego, CA                        | United States | 2001-2006 | 1758 | 77.0 | 78.7 |
| Seattle, WA                          | United States | 2001-2006 | 1189 | 78.0 | 83.8 |
| San Francisco, CA                    | United States | 2001-2006 | 897  | 77.0 | 78.9 |
| Shreveport, LA                       | United States | 2001-2006 | 166  | 75.3 | 79.5 |
| San Jose, CA                         | United States | 2001-2006 | 737  | 74.8 | 82.5 |
| Spokane, WA                          | United States | 2001-2006 | 396  | 77.3 | 83.6 |
| Springfield, MA                      | United States | 2001-2006 | 212  | 79.7 | 81.6 |
| Stamford-Norwalk, CT                 | United States | 2001-2006 | 337  | 79.5 | 82.2 |
| St. Louis, MO-IL                     | United States | 2001-2006 | 1027 | 76.1 | 83.2 |
| Stockton-Lodi, CA                    | United States | 2001-2006 | 300  | 82.0 | 84.7 |
| Syracuse, NY                         | United States | 2001-2006 | 201  | 82.6 | 86.6 |
| Tacoma, WA                           | United States | 2001-2006 | 549  | 81.6 | 85.4 |
| Tampa-St. Petersburg-Clearwater, FL  | United States | 2001-2006 | 811  | 76.7 | 80.9 |
| Toledo, OH                           | United States | 2001-2006 | 316  | 77.8 | 83.9 |
| Trenton, NJ                          | United States | 2001-2006 | 108  | 82.4 | 89.8 |
| Tucson, AZ                           | United States | 2001-2006 | 867  | 76.5 | 77.6 |
| Tulsa, OK                            | United States | 2001-2006 | 507  | 81.1 | 85.2 |

|                                |               |           |       |      |      |
|--------------------------------|---------------|-----------|-------|------|------|
| Utica-Rome, NY                 | United States | 2001-2006 | 122   | 84.4 | 88.5 |
| Ventura County, CA             | United States | 2001-2006 | 445   | 77.8 | 80.4 |
| Virginia Beach, VA             | United States | 2001-2006 | 766   | 76.1 | 82.4 |
| Washington, DC-MD-VA           | United States | 2001-2006 | 244   | 80.3 | 84.0 |
| Wichita, KS                    | United States | 2001-2006 | 334   | 80.8 | 87.4 |
| Wilmington, DE                 | United States | 2001-2006 | 311   | 77.8 | 89.1 |
| Worcester, MA                  | United States | 2001-2006 | 319   | 83.4 | 85.0 |
| West Palm Beach-Boca Raton, FL | United States | 2001-2006 | 921   | 73.3 | 74.5 |
| York, PA                       | United States | 2001-2006 | 264   | 85.2 | 80.3 |
| Youngstown-Warren, OH          | United States | 2001-2006 | 258   | 84.5 | 82.6 |
| SanJose                        | Costa Rica    | 2000-2017 | 4345  | NA   | NA   |
| Guatemala                      | Guatemala     | 2009-2018 | 145   | NA   | NA   |
| Guadalajara                    | Mexico        | 1998-2014 | 3910  | 81.7 | 94.3 |
| Ciudad Juarez                  | Mexico        | 1998-2014 | 1200  | 85.2 | 93.8 |
| Comarca Lagunera               | Mexico        | 1998-2014 | 858   | 85.8 | 91.1 |
| Leon                           | Mexico        | 1998-2014 | 1315  | 83.4 | 96.1 |
| Monterrey                      | Mexico        | 1998-2014 | 2936  | 84.2 | 91.7 |
| Puebla-Tlaxcala                | Mexico        | 1998-2014 | 1831  | 76.8 | 93.7 |
| San Luis Potosi                | Mexico        | 1998-2014 | 910   | 82.5 | 94.5 |
| Tijuana                        | Mexico        | 1998-2014 | 985   | 87.5 | 95.4 |
| Toluca de Lerdo                | Mexico        | 1998-2014 | 726   | 75.1 | 95.2 |
| Valley of Mexico               | Mexico        | 1998-2014 | 11658 | 79.1 | 93.1 |
| Belo Horizonte                 | Brazil        | 2000-2019 | 2828  | 70.6 | 92.1 |
| Brasilia                       | Brazil        | 2000-2019 | 2385  | 74.4 | 93.1 |
| Curitiba                       | Brazil        | 2000-2019 | 1821  | 73.0 | 91.3 |
| Caratinga                      | Brazil        | 2000-2019 | 105   | 78.1 | 95.2 |
| Fortaleza                      | Brazil        | 2000-2019 | 2993  | 77.3 | 91.8 |
| Juiz de Fora                   | Brazil        | 2000-2019 | 518   | 66.6 | 93.4 |
| Londrina                       | Brazil        | 2000-2019 | 607   | 78.3 | 89.5 |
| Maceio                         | Brazil        | 2000-2019 | 685   | 75.5 | 92.8 |
| Palmas                         | Brazil        | 2000-2019 | 259   | 74.5 | 94.6 |
| Porto Alegre                   | Brazil        | 2000-2019 | 2161  | 76.6 | 87.6 |
| Rio Branco                     | Brazil        | 2000-2019 | 412   | 77.4 | 94.4 |
| Sao Luis                       | Brazil        | 2000-2019 | 749   | 78.8 | 93.1 |
| Salvador                       | Brazil        | 2000-2019 | 1039  | 71.6 | 88.6 |
| Sao Paulo                      | Brazil        | 2000-2019 | 9166  | 76.0 | 90.6 |
| Vitoria                        | Brazil        | 2000-2019 | 417   | 67.6 | 90.2 |
| Santiago                       | Chile         | 2008-2014 | 4876  | 78.3 | 90.3 |
| Guayaquil                      | Ecuador       | 2013-2019 | 778   | 81.5 | 88.3 |

|                           |              |           |      |      |       |
|---------------------------|--------------|-----------|------|------|-------|
| Quito                     | Ecuador      | 2013-2019 | 1160 | 76.3 | 92.7  |
| Asuncion                  | Paraguay     | 2004-2019 | 549  | NA   | NA    |
| Adelaide                  | Australia    | 2009-2018 | 36   | 72.2 | 88.9  |
| Brisbane                  | Australia    | 2009-2018 | 1311 | 74.6 | 88.7  |
| Melbourne                 | Australia    | 2009-2018 | 68   | 70.6 | 91.2  |
| Perth                     | Australia    | 2009-2018 | 53   | 69.8 | 75.5  |
| Sydney                    | Australia    | 2009-2018 | 343  | 68.5 | 83.1  |
| Alfred Nzo                | South Africa | 1997-2013 | 101  | 80.2 | 93.1  |
| Amajuba                   | South Africa | 1997-2013 | 41   | 65.9 | 97.6  |
| Amathole                  | South Africa | 1997-2013 | 241  | 81.3 | 95.0  |
| Buffalo City              | South Africa | 1997-2013 | 42   | 61.9 | 100.0 |
| Bojanala                  | South Africa | 1997-2013 | 108  | 79.6 | 96.3  |
| Cacadu                    | South Africa | 1997-2013 | 26   | 65.4 | 96.2  |
| Chris Hani                | South Africa | 1997-2013 | 64   | 65.6 | 85.9  |
| Central Karoo             | South Africa | 1997-2013 | 27   | 77.8 | 96.3  |
| City of Cape Town         | South Africa | 1997-2013 | 453  | 81.7 | 93.6  |
| Capricorn                 | South Africa | 1997-2013 | 33   | 57.6 | 90.9  |
| Cape Winelands            | South Africa | 1997-2013 | 93   | 76.3 | 96.8  |
| City of Johannesburg      | South Africa | 1997-2013 | 79   | 59.5 | 88.6  |
| City of Tshwane           | South Africa | 1997-2013 | 131  | 81.7 | 94.7  |
| Dr Kenneth Kaunda         | South Africa | 1997-2013 | 64   | 75.0 | 89.1  |
| Dr Ruth Segomotsi Mompati | South Africa | 1997-2013 | 42   | 73.8 | 95.2  |
| Eden                      | South Africa | 1997-2013 | 180  | 76.7 | 92.2  |
| Ehlanzeni                 | South Africa | 1997-2013 | 286  | 80.4 | 90.2  |
| Ekurhuleni                | South Africa | 1997-2013 | 60   | 71.7 | 91.7  |
| eThekweni                 | South Africa | 1997-2013 | 109  | 68.8 | 95.4  |
| Frances Baard             | South Africa | 1997-2013 | 171  | 73.7 | 96.5  |
| Fezile Dabi               | South Africa | 1997-2013 | 19   | 52.6 | 100.0 |
| Gert Sibande              | South Africa | 1997-2013 | 209  | 83.7 | 95.2  |
| Greater Sekhukhune        | South Africa | 1997-2013 | 33   | 72.7 | 90.9  |
| iLembe                    | South Africa | 1997-2013 | 26   | 69.2 | 100.0 |
| Joe Gqabi                 | South Africa | 1997-2013 | 47   | 74.5 | 89.4  |
| John Taolo Gaetsewe       | South Africa | 1997-2013 | 42   | 83.3 | 97.6  |
| Lejweleputswa             | South Africa | 1997-2013 | 162  | 80.2 | 91.4  |
| Mangaung                  | South Africa | 1997-2013 | 119  | 83.2 | 96.6  |
| Mopani                    | South Africa | 1997-2013 | 315  | 77.5 | 85.4  |
| Ngaka Modiri Molema       | South Africa | 1997-2013 | 260  | 86.2 | 93.1  |
| Nkangala                  | South Africa | 1997-2013 | 81   | 81.5 | 91.4  |
| Nelson Mandela Bay        | South Africa | 1997-2013 | 192  | 77.6 | 95.8  |

|                    |              |           |        |      |       |
|--------------------|--------------|-----------|--------|------|-------|
| Namakwa            | South Africa | 1997-2013 | 47     | 91.5 | 100.0 |
| O.R.Tambo          | South Africa | 1997-2013 | 64     | 60.9 | 89.1  |
| Overberg           | South Africa | 1997-2013 | 76     | 86.8 | 97.4  |
| Pixley ka Seme     | South Africa | 1997-2013 | 77     | 80.5 | 96.1  |
| Sedibeng           | South Africa | 1997-2013 | 30     | 56.7 | 96.7  |
| Sisonke            | South Africa | 1997-2013 | 355    | 80.3 | 94.9  |
| Siyanda            | South Africa | 1997-2013 | 320    | 72.5 | 96.3  |
| Thabo Mofutsanyane | South Africa | 1997-2013 | 52     | 80.8 | 92.3  |
| Ugu                | South Africa | 1997-2013 | 116    | 67.2 | 96.6  |
| uMgungundlovu      | South Africa | 1997-2013 | 196    | 82.7 | 96.9  |
| uMkhanyakude       | South Africa | 1997-2013 | 96     | 68.8 | 91.7  |
| uMzinyathi         | South Africa | 1997-2013 | 222    | 76.1 | 95.5  |
| uThukela           | South Africa | 1997-2013 | 59     | 74.6 | 89.8  |
| uThungulu          | South Africa | 1997-2013 | 287    | 76.3 | 94.1  |
| Vhembe             | South Africa | 1997-2013 | 88     | 71.6 | 84.1  |
| West Coast         | South Africa | 1997-2013 | 38     | 81.6 | 97.4  |
| West Rand          | South Africa | 1997-2013 | 37     | 67.6 | 100.0 |
| Waterberg          | South Africa | 1997-2013 | 25     | 68.0 | 92.0  |
| Xhariep            | South Africa | 1997-2013 | 28     | 92.9 | 96.4  |
| Zululand           | South Africa | 1997-2013 | 35     | 71.4 | 91.4  |
| Suzhou             | China        | 2015-2019 | 1247   | 60.4 | 66.2  |
| Hokkaido           | Japan        | 1973-2019 | 54250  | 68.4 | 74.7  |
| Aomori             | Japan        | 1973-2019 | 16687  | 71.2 | 71.7  |
| Iwate              | Japan        | 1973-2019 | 18066  | 66.8 | 65.7  |
| Miyagi             | Japan        | 1973-2019 | 20206  | 68.3 | 75.3  |
| Akita              | Japan        | 1973-2019 | 16705  | 65.9 | 64.2  |
| Yamagata           | Japan        | 1973-2019 | 13216  | 66.1 | 65.6  |
| Fukushima          | Japan        | 1973-2019 | 20190  | 67.7 | 70.4  |
| Ibaraki            | Japan        | 1973-2019 | 25336  | 68.1 | 74.5  |
| Tochigi            | Japan        | 1973-2019 | 19113  | 66.4 | 71.2  |
| Gunma              | Japan        | 1973-2019 | 20007  | 65.3 | 69.0  |
| Saitama            | Japan        | 1973-2019 | 53992  | 66.6 | 75.8  |
| Chiba              | Japan        | 1973-2019 | 45227  | 68.2 | 76.1  |
| Tokyo              | Japan        | 1973-2019 | 102322 | 65.9 | 78.4  |
| Kanagawa           | Japan        | 1973-2019 | 62695  | 68.1 | 78.0  |
| Niigata            | Japan        | 1973-2019 | 30406  | 64.0 | 62.5  |
| Toyama             | Japan        | 1973-2019 | 11748  | 65.3 | 67.3  |
| Ishikawa           | Japan        | 1973-2019 | 9996   | 68.2 | 72.9  |
| Fukui              | Japan        | 1973-2019 | 7160   | 67.5 | 66.4  |

|           |               |           |       |      |      |
|-----------|---------------|-----------|-------|------|------|
| Yamanashi | Japan         | 1973-2019 | 8222  | 68.5 | 72.6 |
| Nagano    | Japan         | 1973-2019 | 20321 | 64.8 | 68.4 |
| Gifu      | Japan         | 1973-2019 | 19044 | 64.0 | 67.1 |
| Shizuoka  | Japan         | 1973-2019 | 30062 | 69.6 | 73.0 |
| Aichi     | Japan         | 1973-2019 | 54903 | 65.5 | 73.4 |
| Mie       | Japan         | 1973-2019 | 15103 | 65.5 | 70.0 |
| Shiga     | Japan         | 1973-2019 | 10620 | 65.6 | 70.8 |
| Kyoto     | Japan         | 1973-2019 | 22119 | 64.7 | 73.2 |
| Osaka     | Japan         | 1973-2019 | 79081 | 67.0 | 76.6 |
| Hyogo     | Japan         | 1973-2019 | 49010 | 65.8 | 73.8 |
| Nara      | Japan         | 1973-2019 | 10563 | 64.5 | 71.8 |
| Wakayama  | Japan         | 1973-2019 | 11277 | 65.3 | 67.9 |
| Tottori   | Japan         | 1973-2019 | 5817  | 68.9 | 70.4 |
| Shimane   | Japan         | 1973-2019 | 9207  | 68.3 | 65.0 |
| Okayama   | Japan         | 1973-2019 | 15917 | 67.8 | 72.4 |
| Hiroshima | Japan         | 1973-2019 | 25130 | 67.3 | 72.2 |
| Yamaguchi | Japan         | 1973-2019 | 15655 | 67.6 | 69.5 |
| Tokushima | Japan         | 1973-2019 | 7220  | 64.9 | 69.8 |
| Kagawa    | Japan         | 1973-2019 | 8892  | 66.2 | 72.0 |
| Ehime     | Japan         | 1973-2019 | 14630 | 67.2 | 72.3 |
| Kochi     | Japan         | 1973-2019 | 8940  | 69.3 | 69.3 |
| Fukuoka   | Japan         | 1973-2019 | 45985 | 70.3 | 76.3 |
| Saga      | Japan         | 1973-2019 | 7902  | 71.1 | 74.3 |
| Nagasaki  | Japan         | 1973-2019 | 14248 | 71.0 | 73.9 |
| Kumamoto  | Japan         | 1973-2019 | 17302 | 68.3 | 71.5 |
| Oita      | Japan         | 1973-2019 | 11592 | 67.9 | 71.1 |
| Miyazaki  | Japan         | 1973-2019 | 13413 | 68.9 | 68.6 |
| Kagoshima | Japan         | 1973-2019 | 18817 | 68.8 | 69.6 |
| Okinawa   | Japan         | 1973-2019 | 11905 | 76.9 | 84.1 |
| Seoul     | Korea (South) | 1997-2019 | 45389 | 67.1 | 77.3 |
| Busan     | Korea (South) | 1997-2019 | 20301 | 69.8 | 76.9 |
| Daegu     | Korea (South) | 1997-2019 | 12724 | 67.4 | 78.4 |
| Incheon   | Korea (South) | 1997-2019 | 15096 | 69.3 | 76.0 |
| Gwangju   | Korea (South) | 1997-2019 | 6554  | 67.8 | 80.7 |
| Daejeon   | Korea (South) | 1997-2019 | 7654  | 66.2 | 76.3 |
| Ulsan     | Korea (South) | 1997-2019 | 5333  | 70.1 | 81.5 |
| Suwon     | Korea (South) | 1997-2019 | 5096  | 65.1 | 78.0 |
| Icheon    | Korea (South) | 1997-2019 | 1245  | 67.2 | 68.8 |
| Gangneung | Korea (South) | 1997-2019 | 1571  | 69.3 | 69.1 |



|             |                |           |       |      |      |
|-------------|----------------|-----------|-------|------|------|
| Donghae     | Korea (South)  | 1997-2019 | 687   | 66.7 | 67.2 |
| Sokcho      | Korea (South)  | 1997-2019 | 648   | 70.2 | 72.2 |
| Wonju       | Korea (South)  | 1997-2019 | 2086  | 70.9 | 71.6 |
| Chuncheon   | Korea (South)  | 1997-2019 | 1659  | 69.6 | 66.8 |
| Taebaek     | Korea (South)  | 1997-2019 | 373   | 75.9 | 80.7 |
| Jecheon     | Korea (South)  | 1997-2019 | 1086  | 70.6 | 68.6 |
| Chungju     | Korea (South)  | 1997-2019 | 1562  | 70.0 | 67.4 |
| Boryeong    | Korea (South)  | 1997-2019 | 1019  | 71.9 | 62.2 |
| Seosan      | Korea (South)  | 1997-2019 | 1369  | 67.7 | 65.4 |
| Cheonan     | Korea (South)  | 1997-2019 | 3207  | 68.1 | 77.1 |
| Namwon      | Korea (South)  | 1997-2019 | 608   | 71.7 | 63.8 |
| Jeongeup    | Korea (South)  | 1997-2019 | 828   | 72.7 | 67.6 |
| Mokpo       | Korea (South)  | 1997-2019 | 1291  | 67.9 | 79.6 |
| Yeosu       | Korea (South)  | 1997-2019 | 1422  | 72.8 | 76.2 |
| Gumi        | Korea (South)  | 1997-2019 | 1972  | 68.2 | 81.9 |
| Mungyeong   | Korea (South)  | 1997-2019 | 554   | 67.9 | 62.3 |
| Andong      | Korea (South)  | 1997-2019 | 1228  | 68.2 | 66.9 |
| Yeongju     | Korea (South)  | 1997-2019 | 826   | 68.4 | 66.0 |
| Yoengcheon  | Korea (South)  | 1997-2019 | 774   | 69.5 | 63.2 |
| Pohang      | Korea (South)  | 1997-2019 | 2592  | 67.8 | 78.2 |
| Geojae      | Korea (South)  | 1997-2019 | 1171  | 71.2 | 83.1 |
| Milyang     | Korea (South)  | 1997-2019 | 798   | 71.1 | 66.4 |
| Jinju       | Korea (South)  | 1997-2019 | 1843  | 69.1 | 71.8 |
| Tongyeong   | Korea (South)  | 1997-2019 | 901   | 70.6 | 76.5 |
| Seogyupo    | Korea (South)  | 1997-2019 | 887   | 72.5 | 75.4 |
| Jeju        | Korea (South)  | 1997-2019 | 2111  | 70.3 | 80.4 |
| Caloocan    | Philippines    | 2006-2019 | 382   | 76.2 | 96.9 |
| Las Pinas   | Philippines    | 2006-2019 | 194   | 84.5 | 95.9 |
| Makati      | Philippines    | 2006-2019 | 181   | 32.0 | 97.8 |
| Manila      | Philippines    | 2006-2019 | 1040  | 72.5 | 96.8 |
| Muntinlupa  | Philippines    | 2006-2019 | 196   | 77.6 | 98.0 |
| Pasig       | Philippines    | 2006-2019 | 306   | 42.5 | 97.7 |
| Taguig      | Philippines    | 2006-2019 | 159   | 78.6 | 97.5 |
| Valenzuela  | Philippines    | 2006-2019 | 214   | 46.5 | 98.6 |
| Taipei      | Taiwan         | 1994-2014 | 11724 | 65.6 | 78.5 |
| Taichung    | Taiwan         | 1994-2014 | 4682  | 66.3 | 81.5 |
| Kaohsiung   | Taiwan         | 1994-2014 | 6999  | 67.2 | 78.2 |
| Ho Chi Minh | Vietnam        | 2010-2013 | 460   | 73.0 | 93.9 |
| Brno        | Czech Republic | 2003-2019 | 779   | 80.5 | 68.0 |

|                   |                |           |      |       |      |
|-------------------|----------------|-----------|------|-------|------|
| Ostrava           | Czech Republic | 2003-2019 | 780  | 84.0  | 74.2 |
| Prague            | Czech Republic | 2003-2019 | 2758 | 75.5  | 65.3 |
| Kohtla-Jarve linn | Estonia        | 2005-2015 | 84   | 75.0  | 84.5 |
| Narva linn        | Estonia        | 2005-2015 | 141  | 77.3  | 71.6 |
| Parnu linn        | Estonia        | 2005-2015 | 89   | 76.4  | 68.5 |
| Tallinn           | Estonia        | 2005-2015 | 606  | 72.8  | 70.6 |
| Tartu linn        | Estonia        | 2005-2015 | 176  | 71.6  | 74.4 |
| Alajärvi          | Finland        | 1971-2018 | 63   | 81.0  | 88.9 |
| Alavieska         | Finland        | 1971-2018 | 32   | 87.5  | 78.1 |
| Alavus            | Finland        | 1971-2018 | 134  | 84.3  | 85.1 |
| Asikkala          | Finland        | 1971-2018 | 114  | 85.1  | 79.8 |
| Askola            | Finland        | 1971-2018 | 49   | 81.6  | 83.7 |
| Aura              | Finland        | 1971-2018 | 23   | 87.0  | 73.9 |
| Akaa              | Finland        | 1971-2018 | 151  | 83.4  | 76.8 |
| Brändö            | Finland        | 1971-2018 | 4    | 75.0  | 75.0 |
| Eckerö            | Finland        | 1971-2018 | 9    | 66.7  | 66.7 |
| Enonkoski         | Finland        | 1971-2018 | 22   | 81.8  | 86.4 |
| Enontekiö         | Finland        | 1971-2018 | 23   | 100.0 | 91.3 |
| Espoo             | Finland        | 1971-2018 | 1409 | 69.6  | 89.3 |
| Eura              | Finland        | 1971-2018 | 126  | 83.3  | 76.2 |
| Eurajoki          | Finland        | 1971-2018 | 94   | 80.9  | 77.7 |
| Evijärvi          | Finland        | 1971-2018 | 26   | 84.6  | 84.6 |
| Finström          | Finland        | 1971-2018 | 16   | 93.8  | 56.3 |
| Forssa            | Finland        | 1971-2018 | 227  | 80.2  | 81.5 |
| Föglö             | Finland        | 1971-2018 | 6    | 83.3  | 50.0 |
| Geta              | Finland        | 1971-2018 | 6    | 100.0 | 50.0 |
| Haapajärvi        | Finland        | 1971-2018 | 93   | 82.8  | 91.4 |
| Haapavesi         | Finland        | 1971-2018 | 100  | 82.0  | 89.0 |
| Hailuoto          | Finland        | 1971-2018 | 16   | 93.8  | 93.8 |
| Halsua            | Finland        | 1971-2018 | 11   | 90.9  | 81.8 |
| Hamina            | Finland        | 1971-2018 | 260  | 80.8  | 83.1 |
| Hammarland        | Finland        | 1971-2018 | 17   | 70.6  | 64.7 |
| Hankasalmi        | Finland        | 1971-2018 | 97   | 82.5  | 83.5 |
| Hanko             | Finland        | 1971-2018 | 99   | 80.8  | 80.8 |
| Harjavalta        | Finland        | 1971-2018 | 92   | 77.2  | 79.3 |
| Hartola           | Finland        | 1971-2018 | 73   | 87.7  | 82.2 |
| Hattula           | Finland        | 1971-2018 | 81   | 84.0  | 84.0 |
| Hausjärvi         | Finland        | 1971-2018 | 89   | 80.9  | 76.4 |

|             |         |           |      |      |      |
|-------------|---------|-----------|------|------|------|
| Heinävesi   | Finland | 1971-2018 | 68   | 86.8 | 86.8 |
| Helsinki    | Finland | 1971-2018 | 6352 | 69.0 | 85.9 |
| Vantaa      | Finland | 1971-2018 | 1446 | 71.7 | 90.7 |
| Hirvensalmi | Finland | 1971-2018 | 50   | 84.0 | 74.0 |
| Hollola     | Finland | 1971-2018 | 207  | 82.6 | 80.2 |
| Honkajoki   | Finland | 1971-2018 | 18   | 66.7 | 77.8 |
| Huittinen   | Finland | 1971-2018 | 112  | 88.4 | 82.1 |
| Humppila    | Finland | 1971-2018 | 29   | 93.1 | 82.8 |
| Hyrnsalmi   | Finland | 1971-2018 | 47   | 83.0 | 83.0 |
| Hyvinkää    | Finland | 1971-2018 | 467  | 77.7 | 87.4 |
| Hämeenkyrö  | Finland | 1971-2018 | 97   | 78.4 | 68.0 |
| Hämeenlinna | Finland | 1971-2018 | 703  | 76.7 | 82.5 |
| Heinola     | Finland | 1971-2018 | 290  | 80.0 | 79.7 |
| Ii          | Finland | 1971-2018 | 104  | 80.8 | 86.5 |
| Iisalmi     | Finland | 1971-2018 | 310  | 78.4 | 88.7 |
| Iitti       | Finland | 1971-2018 | 95   | 84.2 | 85.3 |
| Ikaalinen   | Finland | 1971-2018 | 68   | 82.4 | 83.8 |
| Ilmajoki    | Finland | 1971-2018 | 96   | 81.3 | 79.2 |
| Iloantsi    | Finland | 1971-2018 | 111  | 91.0 | 84.7 |
| Inari       | Finland | 1971-2018 | 98   | 86.7 | 92.9 |
| Inkoo       | Finland | 1971-2018 | 28   | 85.7 | 85.7 |
| Isojoki     | Finland | 1971-2018 | 40   | 87.5 | 82.5 |
| Isokyrö     | Finland | 1971-2018 | 43   | 81.4 | 76.7 |
| Imatra      | Finland | 1971-2018 | 434  | 79.3 | 84.6 |
| Janakkala   | Finland | 1971-2018 | 159  | 86.8 | 76.7 |
| Joensuu     | Finland | 1971-2018 | 757  | 79.3 | 90.1 |
| Jokioinen   | Finland | 1971-2018 | 48   | 91.7 | 83.3 |
| Jomala      | Finland | 1971-2018 | 19   | 63.2 | 68.4 |
| Joroinen    | Finland | 1971-2018 | 83   | 86.7 | 83.1 |
| Joutsa      | Finland | 1971-2018 | 110  | 85.5 | 80.0 |
| Juuka       | Finland | 1971-2018 | 133  | 85.0 | 89.5 |
| Juupajoki   | Finland | 1971-2018 | 31   | 83.9 | 83.9 |
| Juva        | Finland | 1971-2018 | 120  | 88.3 | 82.5 |
| Jyväskylä   | Finland | 1971-2018 | 1109 | 72.6 | 86.7 |
| Jämijärvi   | Finland | 1971-2018 | 28   | 89.3 | 92.9 |
| Jämsä       | Finland | 1971-2018 | 321  | 84.7 | 79.8 |
| Järvenpää   | Finland | 1971-2018 | 347  | 73.8 | 92.8 |

|             |         |           |     |      |      |
|-------------|---------|-----------|-----|------|------|
| Kaarina     | Finland | 1971-2018 | 171 | 71.3 | 81.3 |
| Kaavi       | Finland | 1971-2018 | 80  | 82.5 | 86.3 |
| Kajaani     | Finland | 1971-2018 | 526 | 82.1 | 90.3 |
| Kalajoki    | Finland | 1971-2018 | 75  | 81.3 | 78.7 |
| Kangasala   | Finland | 1971-2018 | 242 | 78.1 | 81.0 |
| Kangasniemi | Finland | 1971-2018 | 120 | 78.3 | 82.5 |
| Kankaanpää  | Finland | 1971-2018 | 127 | 81.9 | 85.0 |
| Kannonkoski | Finland | 1971-2018 | 23  | 82.6 | 91.3 |
| Kannus      | Finland | 1971-2018 | 46  | 87.0 | 89.1 |
| Karjajoki   | Finland | 1971-2018 | 15  | 93.3 | 66.7 |
| Karkkila    | Finland | 1971-2018 | 139 | 82.7 | 79.1 |
| Karstula    | Finland | 1971-2018 | 46  | 87.0 | 82.6 |
| Karvia      | Finland | 1971-2018 | 40  | 87.5 | 90.0 |
| Kaskinen    | Finland | 1971-2018 | 17  | 88.2 | 76.5 |
| Kauhajoki   | Finland | 1971-2018 | 164 | 79.9 | 82.9 |
| Kauhava     | Finland | 1971-2018 | 154 | 89.0 | 84.4 |
| Kauniainen  | Finland | 1971-2018 | 59  | 52.5 | 88.1 |
| Kaustinen   | Finland | 1971-2018 | 28  | 78.6 | 96.4 |
| Keitele     | Finland | 1971-2018 | 51  | 84.3 | 86.3 |
| Kemi        | Finland | 1971-2018 | 371 | 80.3 | 87.9 |
| Keminmaa    | Finland | 1971-2018 | 107 | 85.0 | 82.2 |
| Kerava      | Finland | 1971-2018 | 78  | 82.1 | 94.9 |
| Kerava      | Finland | 1971-2018 | 280 | 72.9 | 90.7 |
| Keuruu      | Finland | 1971-2018 | 135 | 75.6 | 77.8 |
| Kihniö      | Finland | 1971-2018 | 18  | 88.9 | 83.3 |
| Kinnula     | Finland | 1971-2018 | 25  | 84.0 | 92.0 |
| Kirkkonummi | Finland | 1971-2018 | 191 | 72.3 | 86.9 |
| Kitee       | Finland | 1971-2018 | 136 | 80.1 | 80.1 |
| Kittilä     | Finland | 1971-2018 | 119 | 89.1 | 89.1 |
| Kiuruvesi   | Finland | 1971-2018 | 148 | 79.1 | 83.8 |
| Kivijärvi   | Finland | 1971-2018 | 12  | 75.0 | 66.7 |
| Kokemäki    | Finland | 1971-2018 | 115 | 87.0 | 80.0 |
| Kokkola     | Finland | 1971-2018 | 323 | 74.6 | 84.5 |
| Kolari      | Finland | 1971-2018 | 77  | 85.7 | 93.5 |
| Konnevesi   | Finland | 1971-2018 | 32  | 78.1 | 81.3 |
| Kontiolahti | Finland | 1971-2018 | 67  | 85.1 | 95.5 |
| Korsnäs     | Finland | 1971-2018 | 17  | 88.2 | 64.7 |

|                    |         |           |      |       |       |
|--------------------|---------|-----------|------|-------|-------|
| Koski Tl           | Finland | 1971-2018 | 43   | 83.7  | 76.7  |
| Kotka              | Finland | 1971-2018 | 737  | 77.1  | 86.2  |
| Kouvola            | Finland | 1971-2018 | 1140 | 80.9  | 84.4  |
| Kristiinankaupunki | Finland | 1971-2018 | 60   | 83.3  | 76.7  |
| Kruunupyö          | Finland | 1971-2018 | 19   | 73.7  | 68.4  |
| Kuhmo              | Finland | 1971-2018 | 174  | 87.4  | 83.9  |
| Kuhmoinen          | Finland | 1971-2018 | 48   | 91.7  | 72.9  |
| Kumlinge           | Finland | 1971-2018 | 3    | 100.0 | 66.7  |
| Kuopio             | Finland | 1971-2018 | 1274 | 76.2  | 89.4  |
| Kuortane           | Finland | 1971-2018 | 41   | 82.9  | 73.2  |
| Kurikka            | Finland | 1971-2018 | 279  | 82.4  | 80.6  |
| Kustavi            | Finland | 1971-2018 | 13   | 84.6  | 69.2  |
| Kuusamo            | Finland | 1971-2018 | 220  | 81.4  | 89.1  |
| Outokumpu          | Finland | 1971-2018 | 118  | 76.3  | 87.3  |
| Kyyjärvi           | Finland | 1971-2018 | 13   | 76.9  | 76.9  |
| Kärkölä            | Finland | 1971-2018 | 83   | 86.7  | 80.7  |
| Kärsämäki          | Finland | 1971-2018 | 47   | 85.1  | 87.2  |
| Kökar              | Finland | 1971-2018 | 1    | 100.0 | 100.0 |
| Kemijärvi          | Finland | 1971-2018 | 175  | 84.6  | 80.6  |
| kemiönsaari        | Finland | 1971-2018 | 91   | 74.7  | 76.9  |
| Lahti              | Finland | 1971-2018 | 1379 | 74.3  | 86.2  |
| Laihia             | Finland | 1971-2018 | 78   | 83.3  | 76.9  |
| Laitila            | Finland | 1971-2018 | 92   | 85.9  | 80.4  |
| Lapinlahti         | Finland | 1971-2018 | 178  | 84.3  | 87.6  |
| Lappajärvi         | Finland | 1971-2018 | 26   | 100.0 | 96.2  |
| Lappeenranta       | Finland | 1971-2018 | 781  | 80.7  | 85.9  |
| Lapinjärvi         | Finland | 1971-2018 | 52   | 88.5  | 73.1  |
| Lapua              | Finland | 1971-2018 | 133  | 83.5  | 83.5  |
| Laukaa             | Finland | 1971-2018 | 176  | 81.8  | 86.9  |
| Lemi               | Finland | 1971-2018 | 25   | 76.0  | 84.0  |
| Lemland            | Finland | 1971-2018 | 9    | 88.9  | 77.8  |
| Lempäälä           | Finland | 1971-2018 | 134  | 79.1  | 83.6  |
| Leppävirta         | Finland | 1971-2018 | 152  | 90.1  | 89.5  |
| Lestijärvi         | Finland | 1971-2018 | 9    | 88.9  | 88.9  |
| Lieksa             | Finland | 1971-2018 | 267  | 82.8  | 85.4  |
| Lieto              | Finland | 1971-2018 | 102  | 75.5  | 81.4  |
| Liminka            | Finland | 1971-2018 | 67   | 89.6  | 80.6  |

|                           |         |           |     |       |      |
|---------------------------|---------|-----------|-----|-------|------|
| Liperi                    | Finland | 1971-2018 | 105 | 85.7  | 86.7 |
| Loimaa                    | Finland | 1971-2018 | 173 | 83.8  | 75.1 |
| Loppi                     | Finland | 1971-2018 | 81  | 84.0  | 85.2 |
| Loviisa                   | Finland | 1971-2018 | 189 | 80.4  | 76.2 |
| Luhanka                   | Finland | 1971-2018 | 16  | 87.5  | 62.5 |
| Lumijoki                  | Finland | 1971-2018 | 10  | 90.0  | 90.0 |
| Lumparland                | Finland | 1971-2018 | 2   | 100.0 | 50.0 |
| Luoto                     | Finland | 1971-2018 | 11  | 81.8  | 81.8 |
| Luumäki                   | Finland | 1971-2018 | 50  | 90.0  | 80.0 |
| Lohja                     | Finland | 1971-2018 | 408 | 79.7  | 83.8 |
| Parainen                  | Finland | 1971-2018 | 141 | 86.5  | 78.0 |
| Maalahti                  | Finland | 1971-2018 | 33  | 81.8  | 66.7 |
| Maarianhamina - Mariehamn | Finland | 1971-2018 | 97  | 78.4  | 77.3 |
| Marttila                  | Finland | 1971-2018 | 33  | 78.8  | 81.8 |
| Masku                     | Finland | 1971-2018 | 43  | 81.4  | 93.0 |
| Merijärvi                 | Finland | 1971-2018 | 15  | 80.0  | 73.3 |
| Merikarvia                | Finland | 1971-2018 | 48  | 85.4  | 75.0 |
| Miehikkälä                | Finland | 1971-2018 | 39  | 87.2  | 76.9 |
| Mikkeli                   | Finland | 1971-2018 | 655 | 78.6  | 83.2 |
| Muhos                     | Finland | 1971-2018 | 90  | 82.2  | 90.0 |
| Multia                    | Finland | 1971-2018 | 38  | 97.4  | 63.2 |
| Muonio                    | Finland | 1971-2018 | 32  | 96.9  | 93.8 |
| Mustasaari                | Finland | 1971-2018 | 62  | 82.3  | 75.8 |
| Muurame                   | Finland | 1971-2018 | 58  | 82.8  | 91.4 |
| Mynämäki                  | Finland | 1971-2018 | 48  | 79.2  | 85.4 |
| Myrskylä                  | Finland | 1971-2018 | 34  | 79.4  | 73.5 |
| Mäntsälä                  | Finland | 1971-2018 | 151 | 80.8  | 79.5 |
| Mäntyharju                | Finland | 1971-2018 | 110 | 82.7  | 80.9 |
| Mänttä-Vilppula           | Finland | 1971-2018 | 195 | 84.6  | 84.6 |
| Naantali                  | Finland | 1971-2018 | 99  | 71.7  | 87.9 |
| Nakkila                   | Finland | 1971-2018 | 60  | 85.0  | 91.7 |
| Nivala                    | Finland | 1971-2018 | 88  | 89.8  | 92.0 |
| Nokia                     | Finland | 1971-2018 | 267 | 71.9  | 82.4 |
| Nousiainen                | Finland | 1971-2018 | 31  | 80.6  | 80.6 |
| Nurmes                    | Finland | 1971-2018 | 204 | 84.8  | 85.8 |
| Nurmijärvi                | Finland | 1971-2018 | 273 | 76.6  | 83.5 |
| Närpes                    | Finland | 1971-2018 | 60  | 83.3  | 80.0 |

|               |         |           |      |      |      |
|---------------|---------|-----------|------|------|------|
| Orimattila    | Finland | 1971-2018 | 173  | 80.3 | 82.7 |
| Oripää        | Finland | 1971-2018 | 14   | 71.4 | 78.6 |
| Orivesi       | Finland | 1971-2018 | 95   | 80.0 | 76.8 |
| Oulainen      | Finland | 1971-2018 | 76   | 76.3 | 92.1 |
| Oulu          | Finland | 1971-2018 | 1615 | 75.7 | 91.0 |
| Padasjoki     | Finland | 1971-2018 | 47   | 78.7 | 78.7 |
| Paimio        | Finland | 1971-2018 | 83   | 80.7 | 81.9 |
| Paltamo       | Finland | 1971-2018 | 74   | 85.1 | 86.5 |
| Parikkala     | Finland | 1971-2018 | 114  | 91.2 | 86.0 |
| Parkano       | Finland | 1971-2018 | 108  | 84.3 | 79.6 |
| Pelkosenniemi | Finland | 1971-2018 | 28   | 96.4 | 78.6 |
| Perho         | Finland | 1971-2018 | 25   | 84.0 | 80.0 |
| Pertunmaa     | Finland | 1971-2018 | 39   | 84.6 | 74.4 |
| Petäjävesi    | Finland | 1971-2018 | 62   | 87.1 | 77.4 |
| Pieksämäki    | Finland | 1971-2018 | 295  | 76.9 | 85.4 |
| Pielavesi     | Finland | 1971-2018 | 125  | 87.2 | 80.0 |
| Pietarsaari   | Finland | 1971-2018 | 130  | 74.6 | 85.4 |
| Pedersöre     | Finland | 1971-2018 | 41   | 85.4 | 85.4 |
| Pihtipudas    | Finland | 1971-2018 | 114  | 88.6 | 85.1 |
| Pirkkala      | Finland | 1971-2018 | 78   | 80.8 | 83.3 |
| Pomarkku      | Finland | 1971-2018 | 79   | 91.1 | 86.1 |
| Pomarkku      | Finland | 1971-2018 | 26   | 69.2 | 76.9 |
| Pori          | Finland | 1971-2018 | 823  | 73.8 | 82.1 |
| Pornainen     | Finland | 1971-2018 | 22   | 86.4 | 77.3 |
| Posio         | Finland | 1971-2018 | 65   | 90.8 | 90.8 |
| Pudasjärvi    | Finland | 1971-2018 | 178  | 84.8 | 88.8 |
| Pukkila       | Finland | 1971-2018 | 21   | 76.2 | 76.2 |
| Punkalaidun   | Finland | 1971-2018 | 44   | 77.3 | 75.0 |
| Puolanka      | Finland | 1971-2018 | 80   | 87.5 | 90.0 |
| Puumala       | Finland | 1971-2018 | 42   | 85.7 | 73.8 |
| Pyhtää        | Finland | 1971-2018 | 61   | 88.5 | 80.3 |
| Pyhäjoki      | Finland | 1971-2018 | 35   | 94.3 | 85.7 |
| Pyhäjärvi     | Finland | 1971-2018 | 144  | 84.7 | 91.0 |
| Pyhäntä       | Finland | 1971-2018 | 20   | 90.0 | 75.0 |
| Pyhäranta     | Finland | 1971-2018 | 24   | 83.3 | 75.0 |
| Pälkäne       | Finland | 1971-2018 | 78   | 80.8 | 79.5 |
| Pöytyä        | Finland | 1971-2018 | 57   | 77.2 | 82.5 |

|             |         |           |     |      |      |
|-------------|---------|-----------|-----|------|------|
| Porvoo      | Finland | 1971-2018 | 410 | 74.9 | 81.2 |
| Raahe       | Finland | 1971-2018 | 295 | 84.7 | 89.2 |
| Raisio      | Finland | 1971-2018 | 196 | 78.6 | 87.2 |
| Rantasalmi  | Finland | 1971-2018 | 65  | 86.2 | 83.1 |
| Ranua       | Finland | 1971-2018 | 62  | 83.9 | 85.5 |
| Rauma       | Finland | 1971-2018 | 391 | 75.2 | 81.6 |
| Rautalampi  | Finland | 1971-2018 | 64  | 79.7 | 78.1 |
| Rautavaara  | Finland | 1971-2018 | 67  | 73.1 | 86.6 |
| Rautjärvi   | Finland | 1971-2018 | 61  | 78.7 | 70.5 |
| Reisjärvi   | Finland | 1971-2018 | 39  | 94.9 | 82.1 |
| Riihimäki   | Finland | 1971-2018 | 281 | 79.0 | 83.6 |
| Ristijärvi  | Finland | 1971-2018 | 32  | 87.5 | 84.4 |
| Rovaniemi   | Finland | 1971-2018 | 616 | 80.7 | 89.0 |
| Ruokolahti  | Finland | 1971-2018 | 69  | 76.8 | 87.0 |
| Ruovesi     | Finland | 1971-2018 | 68  | 77.9 | 76.5 |
| Rusko       | Finland | 1971-2018 | 27  | 81.5 | 81.5 |
| Rääkkylä    | Finland | 1971-2018 | 44  | 88.6 | 93.2 |
| Raasepori   | Finland | 1971-2018 | 265 | 81.5 | 72.5 |
| Saarijärvi  | Finland | 1971-2018 | 107 | 86.0 | 78.5 |
| Salla       | Finland | 1971-2018 | 86  | 90.7 | 88.4 |
| Salo        | Finland | 1971-2018 | 522 | 78.5 | 77.8 |
| Saltvik     | Finland | 1971-2018 | 11  | 72.7 | 90.9 |
| Sauvo       | Finland | 1971-2018 | 30  | 80.0 | 93.3 |
| Savitaipale | Finland | 1971-2018 | 62  | 87.1 | 77.4 |
| Savonlinna  | Finland | 1971-2018 | 480 | 85.2 | 84.6 |
| Savukoski   | Finland | 1971-2018 | 39  | 87.2 | 89.7 |
| Seinäjoki   | Finland | 1971-2018 | 430 | 80.9 | 87.7 |
| Sievi       | Finland | 1971-2018 | 36  | 83.3 | 88.9 |
| Siikainen   | Finland | 1971-2018 | 31  | 83.9 | 90.3 |
| Siikajoki   | Finland | 1971-2018 | 78  | 79.5 | 85.9 |
| Siilinjärvi | Finland | 1971-2018 | 183 | 75.4 | 89.6 |
| Simo        | Finland | 1971-2018 | 49  | 89.8 | 89.8 |
| Sipoo       | Finland | 1971-2018 | 106 | 72.6 | 85.8 |
| Siuntio     | Finland | 1971-2018 | 38  | 76.3 | 89.5 |
| Sodankylä   | Finland | 1971-2018 | 154 | 82.5 | 85.1 |
| Soini       | Finland | 1971-2018 | 28  | 85.7 | 89.3 |
| Somero      | Finland | 1971-2018 | 159 | 82.4 | 74.8 |



|               |         |           |      |      |      |
|---------------|---------|-----------|------|------|------|
| Sodankylä     | Finland | 1971-2018 | 90   | 86.7 | 80.0 |
| Sotkamo       | Finland | 1971-2018 | 158  | 81.6 | 82.3 |
| Sottunga      | Finland | 1971-2018 | 0    | NA   | NA   |
| Sulkava       | Finland | 1971-2018 | 60   | 80.0 | 80.0 |
| Sund          | Finland | 1971-2018 | 15   | 93.3 | 66.7 |
| Suomussalmi   | Finland | 1971-2018 | 191  | 86.4 | 92.1 |
| Suonenjoki    | Finland | 1971-2018 | 110  | 82.7 | 85.5 |
| Sysmä         | Finland | 1971-2018 | 82   | 90.2 | 81.7 |
| Säkylä        | Finland | 1971-2018 | 99   | 81.8 | 78.8 |
| Vaala         | Finland | 1971-2018 | 69   | 92.8 | 89.9 |
| Sastamala     | Finland | 1971-2018 | 247  | 80.6 | 81.4 |
| Siikalatva    | Finland | 1971-2018 | 89   | 92.1 | 85.4 |
| Taipalsaari   | Finland | 1971-2018 | 29   | 79.3 | 79.3 |
| Taivalkoski   | Finland | 1971-2018 | 106  | 85.8 | 87.7 |
| Taivassalo    | Finland | 1971-2018 | 11   | 72.7 | 63.6 |
| Tammela       | Finland | 1971-2018 | 71   | 77.5 | 74.6 |
| Tampere       | Finland | 1971-2018 | 2048 | 71.3 | 84.5 |
| Tervo         | Finland | 1971-2018 | 31   | 90.3 | 77.4 |
| Tervola       | Finland | 1971-2018 | 63   | 84.1 | 88.9 |
| Teuva         | Finland | 1971-2018 | 69   | 79.7 | 81.2 |
| Tohmajärvi    | Finland | 1971-2018 | 80   | 81.3 | 85.0 |
| Toholampi     | Finland | 1971-2018 | 30   | 80.0 | 90.0 |
| Toivakka      | Finland | 1971-2018 | 30   | 86.7 | 56.7 |
| Tornio        | Finland | 1971-2018 | 189  | 80.4 | 86.8 |
| Turku         | Finland | 1971-2018 | 1888 | 70.3 | 82.4 |
| Pello         | Finland | 1971-2018 | 57   | 86.0 | 78.9 |
| Tuusniemi     | Finland | 1971-2018 | 62   | 85.5 | 85.5 |
| Tuusula       | Finland | 1971-2018 | 253  | 73.9 | 88.5 |
| Tyrnävä       | Finland | 1971-2018 | 45   | 73.3 | 82.2 |
| Ulvila        | Finland | 1971-2018 | 97   | 78.4 | 75.3 |
| Urkala        | Finland | 1971-2018 | 74   | 86.5 | 85.1 |
| Utajärvi      | Finland | 1971-2018 | 60   | 86.7 | 85.0 |
| Utsjoki       | Finland | 1971-2018 | 20   | 90.0 | 80.0 |
| Uurainen      | Finland | 1971-2018 | 43   | 81.4 | 69.8 |
| Uusikaarlepyy | Finland | 1971-2018 | 39   | 84.6 | 84.6 |
| Uusikaupunki  | Finland | 1971-2018 | 185  | 78.4 | 83.2 |
| Vaasa         | Finland | 1971-2018 | 467  | 77.5 | 85.7 |

|             |         |           |      |       |       |
|-------------|---------|-----------|------|-------|-------|
| Valkeakoski | Finland | 1971-2018 | 216  | 76.4  | 83.3  |
| Varkaus     | Finland | 1971-2018 | 285  | 76.8  | 84.6  |
| Vehmaa      | Finland | 1971-2018 | 24   | 70.8  | 83.3  |
| Vesanto     | Finland | 1971-2018 | 62   | 91.9  | 83.9  |
| Vesilahti   | Finland | 1971-2018 | 40   | 82.5  | 87.5  |
| Veteli      | Finland | 1971-2018 | 23   | 78.3  | 82.6  |
| Vieremä     | Finland | 1971-2018 | 69   | 84.1  | 82.6  |
| Vihti       | Finland | 1971-2018 | 207  | 75.4  | 83.6  |
| Viitasaari  | Finland | 1971-2018 | 129  | 87.6  | 81.4  |
| Vimpeli     | Finland | 1971-2018 | 24   | 70.8  | 91.7  |
| Virolahti   | Finland | 1971-2018 | 43   | 76.7  | 76.7  |
| Virrat      | Finland | 1971-2018 | 113  | 82.3  | 75.2  |
| Vårdö       | Finland | 1971-2018 | 1    | 100.0 | 100.0 |
| Vörå        | Finland | 1971-2018 | 51   | 82.4  | 78.4  |
| Ylitornio   | Finland | 1971-2018 | 80   | 78.8  | 66.3  |
| Ylivieska   | Finland | 1971-2018 | 114  | 82.5  | 91.2  |
| Ylöjärvi    | Finland | 1971-2018 | 245  | 82.4  | 85.3  |
| Ypäjä       | Finland | 1971-2018 | 31   | 90.3  | 83.9  |
| Ähtäri      | Finland | 1971-2018 | 87   | 74.7  | 81.6  |
| Äänekoski   | Finland | 1971-2018 | 309  | 79.3  | 88.3  |
| Munich      | Germany | 1990-2006 | 3972 | 66.2  | 69.6  |
| Rome        | Italy   | 2006-2015 | 1606 | 71.5  | 66.9  |
| Brasov      | Romania | 1999-2016 | 534  | 81.6  | 79.6  |
| Bucuresti   | Romania | 1999-2016 | 1841 | 81.2  | 76.3  |
| Cluj-Napoca | Romania | 1999-2016 | 485  | 77.5  | 79.0  |
| Constanta   | Romania | 1999-2016 | 573  | 77.3  | 78.0  |
| Craiova     | Romania | 1999-2016 | 374  | 74.1  | 79.7  |
| Galati      | Romania | 1999-2016 | 541  | 82.3  | 84.7  |
| Iasi        | Romania | 1999-2016 | 556  | 80.0  | 88.1  |
| Timisoara   | Romania | 1999-2016 | 476  | 76.7  | 75.0  |
| Almeria     | Spain   | 1990-2013 | 321  | 76.9  | 73.2  |
| Cadiz       | Spain   | 1990-2013 | 242  | 69.4  | 75.6  |
| Cordoba     | Spain   | 1990-2013 | 489  | 74.8  | 75.7  |
| Granada     | Spain   | 1990-2013 | 520  | 70.0  | 74.0  |
| Huelva      | Spain   | 1990-2013 | 186  | 68.3  | 76.3  |
| Jaen        | Spain   | 1990-2013 | 233  | 74.7  | 69.5  |
| Malaga      | Spain   | 1990-2013 | 1113 | 71.9  | 71.3  |
| Sevilla     | Spain   | 1990-2013 | 1173 | 71.8  | 72.2  |

|              |       |           |      |      |      |
|--------------|-------|-----------|------|------|------|
| Huesca       | Spain | 1990-2013 | 103  | 74.8 | 55.3 |
| Teruel       | Spain | 1990-2013 | 67   | 79.1 | 50.7 |
| Zaragoza     | Spain | 1990-2013 | 1076 | 68.6 | 65.3 |
| Oviedo       | Spain | 1990-2013 | 517  | 66.2 | 58.2 |
| Mallorca     | Spain | 1990-2013 | 553  | 80.1 | 75.9 |
| LasPalmas    | Spain | 1990-2013 | 671  | 77.2 | 80.5 |
| Tenerife     | Spain | 1990-2013 | 337  | 76.9 | 78.0 |
| Santander    | Spain | 1990-2013 | 207  | 76.8 | 73.4 |
| Albacete     | Spain | 1990-2013 | 227  | 72.7 | 74.0 |
| CiudadReal   | Spain | 1990-2013 | 88   | 76.1 | 69.3 |
| Cuenca       | Spain | 1990-2013 | 87   | 78.2 | 69.0 |
| Guadalajara  | Spain | 1990-2013 | 94   | 68.1 | 69.1 |
| Toledo       | Spain | 1990-2013 | 82   | 68.3 | 69.5 |
| Avila        | Spain | 1990-2013 | 63   | 84.1 | 71.4 |
| Burgos       | Spain | 1990-2013 | 308  | 73.7 | 72.7 |
| Leon         | Spain | 1990-2013 | 223  | 69.1 | 67.7 |
| Salamanca    | Spain | 1990-2013 | 242  | 67.8 | 73.1 |
| Segovia      | Spain | 1990-2013 | 78   | 78.2 | 53.8 |
| Soria        | Spain | 1990-2013 | 105  | 74.3 | 51.4 |
| Valladolid   | Spain | 1990-2013 | 605  | 71.7 | 67.3 |
| Zamora       | Spain | 1990-2013 | 110  | 71.8 | 55.5 |
| Barcelona    | Spain | 1990-2013 | 2578 | 68.8 | 68.4 |
| Girona       | Spain | 1990-2013 | 117  | 76.1 | 68.4 |
| Lleida       | Spain | 1990-2013 | 238  | 72.3 | 67.2 |
| Tarragona    | Spain | 1990-2013 | 226  | 74.3 | 75.2 |
| Melilla      | Spain | 1990-2013 | 66   | 83.3 | 78.8 |
| Badajoz      | Spain | 1990-2013 | 141  | 73.0 | 83.0 |
| Caceres      | Spain | 1990-2013 | 99   | 78.8 | 70.7 |
| ACoruna      | Spain | 1990-2013 | 532  | 67.9 | 69.2 |
| Lugo         | Spain | 1990-2013 | 228  | 71.5 | 64.5 |
| Ourense      | Spain | 1990-2013 | 233  | 63.5 | 66.1 |
| Pontevedra   | Spain | 1990-2013 | 133  | 75.2 | 69.9 |
| Logrono      | Spain | 1990-2013 | 296  | 46.3 | 40.2 |
| Madrid       | Spain | 1990-2013 | 2180 | 73.8 | 71.8 |
| Murcia       | Spain | 1990-2013 | 585  | 75.7 | 75.9 |
| Pamplona     | Spain | 1990-2013 | 413  | 69.5 | 74.8 |
| Bilbao       | Spain | 1990-2013 | 662  | 69.0 | 69.6 |
| SanSebastian | Spain | 1990-2013 | 344  | 66.3 | 65.7 |
| Vitoria      | Spain | 1990-2013 | 447  | 75.8 | 69.6 |

|                    |                |           |       |      |      |
|--------------------|----------------|-----------|-------|------|------|
| Alicante           | Spain          | 1990-2013 | 585   | 71.1 | 69.9 |
| Castellon          | Spain          | 1990-2013 | 317   | 68.1 | 59.3 |
| Valencia           | Spain          | 1990-2013 | 1458  | 65.9 | 72.6 |
| Zurich             | Switzerland    | 1978-2016 | 11135 | 64.2 | 62.5 |
| Berne              | Switzerland    | 1978-2016 | 8159  | 70.8 | 66.6 |
| Lucerne            | Switzerland    | 1978-2016 | 2372  | 70.7 | 75.1 |
| Basel-Stadt        | Switzerland    | 1978-2016 | 1916  | 60.6 | 64.9 |
| St. Gallen         | Switzerland    | 1978-2016 | 3510  | 71.2 | 72.4 |
| Ticino             | Switzerland    | 1978-2016 | 1554  | 68.1 | 68.0 |
| Vaud               | Switzerland    | 1978-2016 | 5315  | 66.8 | 65.4 |
| Geneva             | Switzerland    | 1978-2016 | 3352  | 59.0 | 67.4 |
| East               | United Kingdom | 2001-2014 | 4841  | 77.3 | 81.9 |
| East Midlands      | United Kingdom | 2001-2014 | 3731  | 79.1 | 84.1 |
| London             | United Kingdom | 2001-2014 | 5358  | 74.3 | 85.9 |
| North East         | United Kingdom | 2001-2014 | 2475  | 80.1 | 86.9 |
| North West         | United Kingdom | 2001-2014 | 6945  | 79.1 | 86   |
| South East         | United Kingdom | 2001-2014 | 7528  | 75.6 | 81.9 |
| South West         | United Kingdom | 2001-2014 | 5192  | 75.6 | 81.4 |
| Wales              | United Kingdom | 2001-2014 | 3415  | 80.1 | 84.5 |
| West Midlands      | United Kingdom | 2001-2014 | 4892  | 79.3 | 83.9 |
| Yorkshire & Humber | United Kingdom | 2001-2014 | 4938  | 79.2 | 85.2 |

**Table S2.** Summary statistics of holidays (median and range of yearly counts) and holiday names including New Year's Day and Christmas in 26 countries.

| Country       | The annual number of holidays | Public holidays                                                                                                                                                                                                                                                                                            | Local holidays |
|---------------|-------------------------------|------------------------------------------------------------------------------------------------------------------------------------------------------------------------------------------------------------------------------------------------------------------------------------------------------------|----------------|
| Canada        | 9 (8-11)                      | Canada Day, Christmas, Good Friday, Labour Day, New Year's Day, Remembrance Day, Thanksgiving Day, Victoria Day                                                                                                                                                                                            |                |
| United States | 10.5 (10-13)                  | Christmas Day, Christmas Eve (2018), Columbus Day, Independence Day, Labor Day, Martin Luther King Jr. Day, Memorial Day, New Year's Day, Presidents' Day, Thanksgiving Day, Veterans Day                                                                                                                  |                |
| Costa Rica    | 12 (11-13)                    | All Souls' Day, Annexation of Guanacaste, Battle of Rivas, Christmas Day, Day of the Cultures, Good Friday, Independence Day, Labor Day / May Day, Maundy Thursday, Mother's Day, New Year's Day, Our Lady of Los Angeles, Tropical Storm Otto (2016)                                                      |                |
| Guatemala     | 14 (14-15)                    | All Saints' Day, Army Day Holiday, Bank Employee Day, Boxing Day, Christmas Day, Christmas Eve, Dia de la raza, Easter Saturday, Good Friday, Independence Day, Labor Day, Maundy Thursday, New Year's Day, New Year's Eve, Revolution of 1944                                                             |                |
| Mexico        | 7 (7-9)                       | Benito Ju rez's Birthday Memorial, Christmas Day, Constitution Day, Inauguration day, Independence Day, Labor Day / May Day, Mexican general election, New Year's Day, Revolution Day Memorial                                                                                                             |                |
| Brazil        | 16 (15-16)                    | All Souls' Day, Carnival Tuesday, Christmas Day, Corpus Christi, Easter Sunday, Good Friday, Independence Day, Labor Day / May Day, New Year's Day, Our Lady Aparecida/Children's Day, Republic Proclamation Day, Tiradentes Day                                                                           |                |
| Chile         | 15 (15-16)                    | All Saints' Day, Army Day, Assumption of Mary, Chilean coup (1997), Christmas Day, Columbus Day, Corpus Christi, Good Friday, Holy Saturday, Immaculate Conception Day, Labor Day / May Day, National Day, Navy Day, New Year's Day, Our Lady of Mount Carmel, Reformation Day, Saint Peter and Saint Paul |                |
| Ecuador       | 12 (11-14)                    | All Souls' Day, Carnival, Christmas Day, Good Friday, Independence Day, Independence of Cuenca, Independence of Guayaquil, Labor Day / May Day, New Year's Day, New Year's Eve, The Battle of Pichincha                                                                                                    |                |
| Paraguay      | 12 (11-15)                    | Boqueron Battle Victory Day, Chaco Armistice, Christmas Day, Founding of Asuncion, Good Friday, Heroes' Day, Independence Day, Labor Day / May Day, Maundy Thursday, National Holiday, New Year's Day, Papal Visit (2015), Public Sector Half Day (2015), Virgin of Caacup Day                             |                |
| Australia     | 8 (7-8)                       | ANZAC Day, Australia Day, Boxing Day, Christmas Day, Easter Monday, Good Friday, Holy Saturday, New Year's Day                                                                                                                                                                                             |                |
| South Africa  | 13 (13-15)                    | Christmas Day, Day of Goodwill, Day of Reconciliation, Election Day (2011, 2016), Family Day, Freedom Day, Good Friday, Heritage Day, Human Rights Day, Municipal Elections (2016), National Women's Day, New Year's Day, Workers' Day, Youth Day                                                          |                |

|                       |                   |                                                                                                                                                                                                                                                                                                                                                                                                                                                                                                 |
|-----------------------|-------------------|-------------------------------------------------------------------------------------------------------------------------------------------------------------------------------------------------------------------------------------------------------------------------------------------------------------------------------------------------------------------------------------------------------------------------------------------------------------------------------------------------|
| <b>China</b>          | <b>30 (24-32)</b> | Army Day, Children's Day, Chinese New Year, Dragon Boat Festival, International Women's Day, Labour Day, Mid-Autumn Festival, National Day, New Year's Day, Qing Ming Jie, Spring Festival, Victory Day, Youth Day                                                                                                                                                                                                                                                                              |
| <b>Japan</b>          | <b>16 (13-21)</b> | Autumn Equinox, Between Day, Children's Day, Christmas, Coming of Age Day, Constitution Memorial Day, Culture Day, Emperor's Birthday, Greenery Day, Labor Thanksgiving Day, Mountain Day, National Foundation Day, New Year's Day, Respect for the Aged Day, Sea Day, Shōwa Day, Sports Day, Spring Equinox                                                                                                                                                                                    |
| <b>Korea</b>          | <b>15 (13-18)</b> | Arbor Day, Buddha's Birthday, Children's Day, Christmas Day, Christmas Eve (2002), Chuseok, Constitution Day, December Solstice (2002), Hangeul Proclamation Day, Independence Movement Day, Liberation Day, Local Election Day(2018), Memorial Day, National Assembly Election Day (2016), National Foundation Day, New Year's Day, New Year's Eve (2002), Presidential Election (2017), Seollal, Teacher's Day (2003)                                                                         |
| <b>Philippines</b>    | <b>18 (16-22)</b> | 150th Birthday of Dr. Jose P. Rizal (2011), APEC Summit Extra Holiday (2015), All Saints' Day, Barangay Elections (2013), Bonifacio Day, Chinese Lunar New Year's Day, Christmas Day, Christmas Eve, Eid al-Adha (Feast of the Sacrifice), Eidul-Fitar, Good Friday, Holy Saturday, Independence Day, Labor Day, Maundy Thursday, National Elections (2010, 2016), National Heroes Day, New Year's Day, New Year's Eve, Ninoy Aquino Day, People Power Anniversary, Rizal Day, The Day of Valor |
| <b>Taiwan</b>         | <b>14 (13-15)</b> | Armed Forces Day, Children's Day, Chinese New Year Holiday, Chinese New Year's Day, Chinese New Year's Eve, Dragon Boat Festival, Labor Day, Mid-Autumn Festival, National Day, Peace Memorial Day, Republic Day/New Year's Day, Tomb Sweeping Day, Victory Day                                                                                                                                                                                                                                 |
| <b>Vietnam</b>        | <b>13 (12-13)</b> | Independence Day, International Labor Day, International New Year's Day, Liberation Day/Reunification Day, Tet holiday, Vietnamese Kings' Commemoration Day, Vietnamese New Year, Vietnamese New Year's Eve                                                                                                                                                                                                                                                                                     |
| <b>Czech Republic</b> | <b>12 (12-13)</b> | Christmas Day, Christmas Eve, Easter Monday, Independent Czechoslovak State Day, Jan Hus Day, Labor Day / May Day, New Year's Day, Restoration of the Czech Independence Day, Saints Cyril and Methodius, St. Stephen's Day, St. Wenceslas Day, Struggle for Freedom and Democracy Day, Victory in Europe Day                                                                                                                                                                                   |
| <b>Estonia</b>        | <b>12 (12-12)</b> | Boxing Day, Christmas Day, Christmas Eve, Easter Sunday, Good Friday, Independence Day, Independence Restoration Day, Labor Day, Midsummer Day, New Year's Day, Pentecost, Victory Day                                                                                                                                                                                                                                                                                                          |
| <b>Finland</b>        | <b>13 (10-14)</b> | All Saints' Day, Ascension Day, Boxing Day, Christmas Day, Christmas Eve, Easter Monday, Epiphany, Good Friday, Independence Day, May Day, Midsummer, Midsummer Eve, New Year's Day                                                                                                                                                                                                                                                                                                             |

|                       |                     |                                                                                                                                                                                                                                                                                                                                                                |                                                                                                                                                                                                                                                    |
|-----------------------|---------------------|----------------------------------------------------------------------------------------------------------------------------------------------------------------------------------------------------------------------------------------------------------------------------------------------------------------------------------------------------------------|----------------------------------------------------------------------------------------------------------------------------------------------------------------------------------------------------------------------------------------------------|
| <b>Germany</b>        | <b>9 (9-11)</b>     | Ascension Day, Boxing Day, Christmas Day, Day of German Unity, Easter Monday, Good Friday, May Day, New Year's Day, Repentance Day, Whit Monday                                                                                                                                                                                                                |                                                                                                                                                                                                                                                    |
| <b>Italy</b>          | <b>11 (11-11)</b>   | 150th Anniversary of National Unity (2011), All Saints' Day, Assumption of Mary, Christmas Day, Easter Monday, Epiphany, Feast of the Immaculate Conception, Labor Day / May Day, Liberation Day, New Year's Day, Republic Day, St. Stephen's Day                                                                                                              |                                                                                                                                                                                                                                                    |
| <b>Romania</b>        | <b>11 (10-15)</b>   | Children's Day, Christmas Day, Christmas Eve (2016), Day after New Year's Day, Labor Day / May Day, National holiday, New Year's Day, New Year's Eve (2016), Orthodox Easter Day, Orthodox Easter Monday, Orthodox Good Friday (2018), Orthodox Pentecost, Orthodox Pentecost Monday, Second day of Christmas, St Andrew's Day, St Mary's Day, Unification Day |                                                                                                                                                                                                                                                    |
| <b>Spain</b>          | <b>13.5 (12-15)</b> | All Saints' Day, Ash Wednesday (1996, 1997), Assumption of Mary, Christmas Day, Constitution Day, Epiphany, Good Friday, Hispanic Day, Immaculate Conception, Labor Day / May Day, New Year's Day                                                                                                                                                              | Easter Monday, Feast of Saint James the Apostle, Maundy Thursday, San Jose                                                                                                                                                                         |
| <b>Switzerland</b>    | <b>17 (16-17)</b>   | Swiss National Day                                                                                                                                                                                                                                                                                                                                             | Ascension Day, Assumption of Mary, Berchtold Day, Christmas Day, Corpus Christi, Easter Monday, Epiphany, Good Friday, Immaculate Conception, May Day, New Year's Day, Pentecost Monday, Saint Joseph's Day, St. Stephen's Day, Swiss Federal Fast |
| <b>United Kingdom</b> | <b>7 (6-9)</b>      | Boxing Day, Christmas Day, Early May Bank Holiday, Golden Jubilee Bank Holiday (2002), Good Friday, New Year's Day, New Year's Eve (1999), Royal Wedding Bank Holiday (2011), Spring Bank Holiday, The Queen's Diamond Jubilee (2012)                                                                                                                          |                                                                                                                                                                                                                                                    |

The holidays (year) indicate a national holiday exceptionally taken in the specific year.

**Table S3.** Country-specific distributions of other national holidays (national holidays except for New Year’s Day and Christmas day) by day of the week. Numbers: the number of days over the study period (%)

|                       | <b>Period</b> | <b>Mon</b> | <b>Tue</b> | <b>Wed</b> | <b>Thu</b> | <b>Fri</b> | <b>Sat</b> | <b>Sun</b> |
|-----------------------|---------------|------------|------------|------------|------------|------------|------------|------------|
| <b>Canada</b>         | 1986-2015     | 118 (57.8) | 10 (4.9)   | 10 (4.9)   | 8 (3.9)    | 42 (20.6)  | 8 (3.9)    | 8 (3.9)    |
| <b>United States</b>  | 2001-2006     | 34 (66.7)  | 2 (3.9)    | 1 (2.0)    | 8 (15.7)   | 3 (5.9)    | 1 (2.0)    | 2 (3.9)    |
| <b>Costa Rica</b>     | 2000-2017     | 20 (11.5)  | 20 (11.5)  | 20 (11.5)  | 39 (22.4)  | 40 (23.0)  | 17 (9.8)   | 18 (10.3)  |
| <b>Guatemala</b>      | 2009-2018     | 14 (11.6)  | 13 (10.7)  | 11 (9.1)   | 25 (20.7)  | 21 (17.4)  | 25 (20.7)  | 12 (9.9)   |
| <b>Mexico</b>         | 1998-2014     | 32 (35.2)  | 10 (11.0)  | 7 (7.7)    | 10 (11.0)  | 9 (9.9)    | 11 (12.1)  | 12 (13.2)  |
| <b>Brazil</b>         | 2000-2019     | 31 (11.1)  | 44 (15.8)  | 45 (16.1)  | 45 (16.1)  | 46 (16.5)  | 27 (9.7)   | 41 (14.7)  |
| <b>Chile</b>          | 2008-2014     | 17 (18.3)  | 6 (6.5)    | 9 (9.7)    | 11 (11.8)  | 20 (21.5)  | 19 (20.4)  | 11 (11.8)  |
| <b>Ecuador</b>        | 2013-2019     | 17 (23.6)  | 10 (13.9)  | 3 (4.2)    | 4 (5.6)    | 26 (36.1)  | 5 (6.9)    | 7 (9.7)    |
| <b>Paraguay</b>       | 2004-2019     | 26 (16.6)  | 18 (11.5)  | 15 (9.6)   | 32 (20.4)  | 30 (19.1)  | 18 (11.5)  | 18 (11.5)  |
| <b>Australia</b>      | 2009-2018     | 15 (28.8)  | 6 (11.5)   | 5 (9.6)    | 4 (7.7)    | 13 (25.0)  | 6 (11.5)   | 3 (5.8)    |
| <b>South Africa</b>   | 1997-2013     | 56 (29.2)  | 20 (10.4)  | 21 (10.9)  | 19 (9.9)   | 37 (19.3)  | 19 (9.9)   | 20 (10.4)  |
| <b>China</b>          | 2015-2019     | 23 (16.4)  | 16 (11.4)  | 15 (10.7)  | 19 (13.6)  | 21 (15.0)  | 23 (16.4)  | 23 (16.4)  |
| <b>Japan</b>          | 1973-2019     | 221 (31.3) | 79 (11.2)  | 82 (11.6)  | 80 (11.3)  | 79 (11.2)  | 84 (11.9)  | 81 (11.5)  |
| <b>Korea (South)</b>  | 1997-2019     | 51 (16.9)  | 44 (14.6)  | 46 (15.2)  | 41 (13.6)  | 43 (14.2)  | 41 (13.6)  | 36 (11.9)  |
| <b>Philippines</b>    | 2006-2019     | 63 (26.7)  | 25 (10.6)  | 21 (8.9)   | 31 (13.1)  | 44 (18.6)  | 25 (10.6)  | 27 (11.4)  |
| <b>Taiwan</b>         | 1994-2014     | 41 (15.1)  | 39 (14.4)  | 39 (14.4)  | 39 (14.4)  | 38 (14)    | 39 (14.4)  | 36 (13.3)  |
| <b>Vietnam</b>        | 2010-2013     | 10 (22.2)  | 6 (13.3)   | 5 (11.1)   | 5 (11.1)   | 7 (15.6)   | 6 (13.3)   | 6 (13.3)   |
| <b>Czech Republic</b> | 2003-2019     | 38 (21.8)  | 22 (12.6)  | 22 (12.6)  | 22 (12.6)  | 26 (14.9)  | 21 (12.1)  | 23 (13.2)  |
| <b>Estonia</b>        | 2005-2015     | 11 (10.0)  | 11 (10.0)  | 11 (10)    | 12 (10.9)  | 22 (20.0)  | 11 (10.0)  | 32 (29.1)  |
| <b>Finland</b>        | 1971-2018     | 83 (15.2)  | 32 (5.9)   | 33 (6.0)   | 60 (11.0)  | 125 (22.9) | 183 (33.5) | 30 (5.5)   |
| <b>Germany</b>        | 1990-2006     | 41 (32.8)  | 8 (6.4)    | 12 (9.6)   | 25 (20.0)  | 23 (18.4)  | 7 (5.6)    | 9 (7.2)    |
| <b>Italy</b>          | 2006-2015     | 19 (21.1)  | 12 (13.3)  | 11 (12.2)  | 11 (12.2)  | 13 (14.4)  | 14 (15.6)  | 10 (11.1)  |
| <b>Romania</b>        | 1999-2016     | 49 (28.7)  | 11 (6.4)   | 15 (8.8)   | 13 (7.6)   | 16 (9.4)   | 17 (9.9)   | 50 (29.2)  |
| <b>Spain</b>          | 1990-2013     | 53 (19.0)  | 29 (10.4)  | 32 (11.5)  | 54 (19.4)  | 54 (19.4)  | 29 (10.4)  | 28 (10.0)  |
| <b>Switzerland</b>    | 1978-2016     | 129 (22.1) | 49 (8.4)   | 51 (8.7)   | 126 (21.6) | 90 (15.4)  | 52 (8.9)   | 87 (14.9)  |
| <b>United Kingdom</b> | 2001-2014     | 33 (50.0)  | 7 (10.6)   | 3 (4.5)    | 2 (3.0)    | 18 (27.3)  | 1 (1.5)    | 2 (3.0)    |



**Table S4.** Country-specific average suicide counts by day-of-the week. Numbers: average suicide count and standard deviation over the study period.

| Country               | Mean (SD)   |             |             |             |             |             |             |
|-----------------------|-------------|-------------|-------------|-------------|-------------|-------------|-------------|
|                       | Mon         | Tue         | Wed         | Thu         | Fri         | Sat         | Sun         |
| <b>Canada</b>         | 5.2 (2.5)   | 4.9 (2.5)   | 4.7 (2.5)   | 4.7 (2.4)   | 4.6 (2.4)   | 4.5 (2.4)   | 4.6 (2.4)   |
| <b>United States</b>  | 43.3 (7.4)  | 40.9 (6.9)  | 39.6 (6.9)  | 38.1 (6.1)  | 37.7 (6.7)  | 34.9 (6.1)  | 36.1 (6.4)  |
| <b>Costa Rica</b>     | 0.7 (0.7)   | 0.6 (0.8)   | 0.7 (0.8)   | 0.7 (0.7)   | 0.6 (0.7)   | 0.7 (0.8)   | 0.7 (0.8)   |
| <b>Guatemala</b>      | 0.0 (0.2)   | 0.1 (0.3)   | 0.0 (0.2)   | 0.0 (0.2)   | 0.0 (0.2)   | 0.0 (0.2)   | 0.0 (0.2)   |
| <b>Mexico</b>         | 4.5 (2.4)   | 3.8 (2.1)   | 3.9 (2.2)   | 4.0 (2.2)   | 3.7 (2.0)   | 4.2 (2.2)   | 5.5 (2.6)   |
| <b>Brazil</b>         | 3.8 (2.0)   | 3.4 (1.8)   | 3.4 (1.9)   | 3.5 (1.9)   | 3.5 (1.9)   | 3.6 (1.9)   | 3.8 (2.0)   |
| <b>Chile</b>          | 2.0 (1.5)   | 1.8 (1.3)   | 1.7 (1.4)   | 1.6 (1.3)   | 1.7 (1.3)   | 2.2 (1.5)   | 2.4 (1.5)   |
| <b>Ecuador</b>        | 0.8 (0.9)   | 0.7 (0.9)   | 0.7 (0.9)   | 0.7 (0.9)   | 0.7 (0.9)   | 0.8 (1.0)   | 0.9 (1.0)   |
| <b>Paraguay</b>       | 0.1 (0.3)   | 0.1 (0.3)   | 0.1 (0.3)   | 0.1 (0.3)   | 0.1 (0.3)   | 0.1 (0.3)   | 0.1 (0.3)   |
| <b>Australia</b>      | 0.5 (0.7)   | 0.5 (0.7)   | 0.5 (0.7)   | 0.5 (0.7)   | 0.5 (0.7)   | 0.4 (0.6)   | 0.5 (0.7)   |
| <b>South Africa</b>   | 1.0 (1.1)   | 1.0 (1.1)   | 0.9 (1.1)   | 0.9 (1.0)   | 0.9 (1.0)   | 1.1 (1.1)   | 1.1 (1.1)   |
| <b>China</b>          | 0.7 (0.9)   | 0.7 (0.8)   | 0.7 (0.8)   | 0.7 (0.8)   | 0.7 (0.8)   | 0.6 (0.8)   | 0.6 (0.9)   |
| <b>Japan</b>          | 73.2 (19.9) | 68.4 (17.9) | 67.0 (17.3) | 66.1 (16.9) | 65.4 (16.5) | 58.6 (13.5) | 60.7 (15.1) |
| <b>Korea (South)</b>  | 20.5 (7.8)  | 19.7 (7.3)  | 19.1 (7.2)  | 18.8 (7.0)  | 18.3 (6.8)  | 16.6 (6.1)  | 17.1 (6.4)  |
| <b>Philippines</b>    | 0.6 (0.8)   | 0.5 (0.7)   | 0.5 (0.7)   | 0.5 (0.8)   | 0.5 (0.7)   | 0.5 (0.8)   | 0.6 (0.8)   |
| <b>Taiwan</b>         | 3.4 (2.4)   | 3.2 (2.3)   | 3.1 (2.2)   | 3.1 (2.3)   | 3.1 (2.2)   | 2.8 (2.0)   | 2.7 (1.9)   |
| <b>Vietnam</b>        | 0.3 (0.6)   | 0.3 (0.6)   | 0.3 (0.6)   | 0.3 (0.6)   | 0.3 (0.6)   | 0.3 (0.6)   | 0.3 (0.6)   |
| <b>Czech Republic</b> | 0.8 (0.9)   | 0.7 (0.8)   | 0.7 (0.8)   | 0.7 (0.8)   | 0.7 (0.8)   | 0.6 (0.8)   | 0.6 (0.8)   |
| <b>Estonia</b>        | 0.3 (0.5)   | 0.3 (0.5)   | 0.3 (0.6)   | 0.3 (0.5)   | 0.3 (0.5)   | 0.3 (0.5)   | 0.3 (0.6)   |
| <b>Finland</b>        | 3.2 (1.9)   | 3.1 (1.9)   | 3.0 (1.8)   | 3.0 (1.8)   | 3.0 (1.9)   | 3.3 (2.0)   | 3.3 (2.0)   |
| <b>Germany</b>        | 0.8 (0.9)   | 0.7 (0.9)   | 0.7 (0.8)   | 0.6 (0.8)   | 0.6 (0.8)   | 0.5 (0.7)   | 0.6 (0.8)   |
| <b>Italy</b>          | 0.5 (0.7)   | 0.4 (0.7)   | 0.5 (0.7)   | 0.5 (0.7)   | 0.4 (0.6)   | 0.4 (0.6)   | 0.4 (0.6)   |
| <b>Romania</b>        | 0.9 (1.0)   | 0.8 (0.9)   | 0.8 (0.9)   | 0.9 (1.0)   | 0.8 (0.8)   | 0.7 (0.8)   | 0.8 (0.9)   |
| <b>Spain</b>          | 2.8 (1.7)   | 2.6 (1.7)   | 2.5 (1.7)   | 2.5 (1.6)   | 2.5 (1.6)   | 2.3 (1.6)   | 2.4 (1.6)   |
| <b>Switzerland</b>    | 3.0 (1.8)   | 2.8 (1.7)   | 2.8 (1.7)   | 2.7 (1.7)   | 2.6 (1.7)   | 2.2 (1.5)   | 2.2 (1.5)   |
| <b>UK</b>             | 11.0 (3.6)  | 9.9 (3.2)   | 9.9 (3.3)   | 9.6 (3.3)   | 9.4 (3.2)   | 8.8 (3.0)   | 8.9 (3.0)   |

**Table S5.** Risks of suicide by the day-of-the week (a reference day: Wednesdays) for 26 countries with the corresponding 95% confidence intervals (CI).

| Region          | Country    | Subgroup         | RR (95% CI)      |                  |                  |                  |                  |                  |                  |
|-----------------|------------|------------------|------------------|------------------|------------------|------------------|------------------|------------------|------------------|
|                 |            |                  | Mon              | Tue              | Wed (Ref)        | Thu              | Fri              | Sat              | Sun              |
| North America   | Canada     | Total            | 1.10 (1.04-1.16) | 1.04 (1.01-1.06) | 1.00 (1.00-1.00) | 0.98 (0.96-1.00) | 0.98 (0.95-1.02) | 0.95 (0.83-1.10) | 0.97 (0.82-1.14) |
| North America   | Canada     | Male             | 1.10 (1.05-1.15) | 1.04 (1.00-1.07) | 1.00 (1.00-1.00) | 0.99 (0.96-1.03) | 0.97 (0.94-1.01) | 0.93 (0.81-1.08) | 0.95 (0.84-1.08) |
| North America   | Canada     | Female           | 1.09 (1.02-1.17) | 1.05 (0.98-1.12) | 1.00 (1.00-1.00) | 0.97 (0.92-1.03) | 1.00 (0.93-1.06) | 0.99 (0.82-1.20) | 1.05 (0.84-1.31) |
| North America   | Canada     | Aged 0-64        | 1.09 (1.05-1.14) | 1.03 (1.01-1.06) | 1.00 (1.00-1.00) | 0.98 (0.95-1.02) | 0.98 (0.94-1.03) | 0.95 (0.81-1.13) | 0.97 (0.83-1.14) |
| North America   | Canada     | Aged 65 or older | 1.16 (1.02-1.32) | 1.07 (0.99-1.16) | 1.00 (1.00-1.00) | 0.99 (0.92-1.08) | 0.98 (0.91-1.05) | 0.95 (0.82-1.10) | 0.97 (0.79-1.21) |
| North America   | USA        | Total            | 1.11 (1.06-1.17) | 1.04 (1.01-1.06) | 1.00 (1.00-1.00) | 0.98 (0.96-1.00) | 0.96 (0.93-1.00) | 0.89 (0.77-1.03) | 0.93 (0.79-1.09) |
| North America   | USA        | Male             | 1.12 (1.07-1.17) | 1.04 (1.01-1.07) | 1.00 (1.00-1.00) | 0.98 (0.95-1.01) | 0.96 (0.93-0.99) | 0.89 (0.77-1.02) | 0.92 (0.81-1.04) |
| North America   | USA        | Female           | 1.11 (1.04-1.19) | 1.04 (0.98-1.11) | 1.00 (1.00-1.00) | 0.96 (0.91-1.01) | 0.97 (0.91-1.03) | 0.92 (0.76-1.12) | 0.95 (0.76-1.18) |
| North America   | USA        | Aged 0-64        | 1.10 (1.06-1.15) | 1.03 (1.01-1.06) | 1.00 (1.00-1.00) | 0.97 (0.94-1.00) | 0.96 (0.92-1.00) | 0.88 (0.75-1.04) | 0.91 (0.78-1.07) |
| North America   | USA        | Aged 65 or older | 1.17 (1.04-1.33) | 1.06 (0.98-1.14) | 1.00 (1.00-1.00) | 0.99 (0.92-1.07) | 0.98 (0.92-1.05) | 0.95 (0.82-1.10) | 0.98 (0.80-1.21) |
| Central America | Costa Rica | Total            | 1.02 (0.95-1.10) | 1.00 (0.96-1.05) | 1.00 (1.00-1.00) | 1.02 (0.98-1.07) | 0.98 (0.92-1.03) | 0.99 (0.85-1.16) | 1.08 (0.91-1.29) |
| Central America | Guatemala  | Total            | 1.06 (0.97-1.16) | 1.00 (0.95-1.04) | 1.00 (1.00-1.00) | 1.01 (0.97-1.06) | 0.96 (0.90-1.02) | 0.95 (0.76-1.19) | 1.09 (0.85-1.41) |
| Central America | Mexico     | Total            | 1.14 (1.06-1.21) | 0.98 (0.94-1.03) | 1.00 (1.00-1.00) | 1.01 (0.97-1.06) | 0.95 (0.90-1.00) | 1.09 (0.95-1.26) | 1.41 (1.20-1.66) |
| Central America | Mexico     | Male             | 1.14 (1.06-1.23) | 0.97 (0.91-1.03) | 1.00 (1.00-1.00) | 1.00 (0.94-1.06) | 0.94 (0.88-1.00) | 1.07 (0.87-1.32) | 1.43 (1.20-1.71) |
| Central America | Mexico     | Female           | 1.16 (1.02-1.31) | 1.07 (0.95-1.21) | 1.00 (1.00-1.00) | 1.12 (1.00-1.26) | 1.03 (0.91-1.17) | 1.18 (0.90-1.55) | 1.42 (1.04-1.92) |
| Central America | Mexico     | Aged 0-64        | 1.16 (1.08-1.24) | 0.99 (0.94-1.04) | 1.00 (1.00-1.00) | 1.02 (0.97-1.09) | 0.95 (0.88-1.02) | 1.10 (0.87-1.40) | 1.46 (1.17-1.82) |
| Central America | Mexico     | Aged 65 or older | 0.98 (0.76-1.26) | 0.95 (0.78-1.16) | 1.00 (1.00-1.00) | 1.00 (0.82-1.22) | 0.99 (0.82-1.20) | 0.97 (0.73-1.27) | 1.01 (0.71-1.43) |
| South America   | Brazil     | Total            | 1.12 (1.06-1.19) | 1.02 (0.98-1.07) | 1.00 (1.00-1.00) | 1.02 (0.98-1.07) | 1.02 (0.97-1.08) | 1.07 (0.95-1.21) | 1.13 (0.99-1.30) |
| South America   | Brazil     | Male             | 1.16 (1.09-1.23) | 1.05 (1.00-1.11) | 1.00 (1.00-1.00) | 1.06 (1.01-1.12) | 1.06 (1.00-1.12) | 1.11 (0.97-1.26) | 1.16 (1.03-1.30) |
| South America   | Brazil     | Female           | 1.06 (0.97-1.17) | 0.96 (0.87-1.05) | 1.00 (1.00-1.00) | 0.95 (0.87-1.04) | 0.93 (0.85-1.02) | 0.99 (0.82-1.19) | 1.13 (0.92-1.39) |
| South America   | Brazil     | Aged 0-64        | 1.14 (1.07-1.20) | 1.03 (0.98-1.08) | 1.00 (1.00-1.00) | 1.04 (0.99-1.09) | 1.04 (0.98-1.10) | 1.09 (0.94-1.27) | 1.17 (1.02-1.34) |
| South America   | Brazil     | Aged 65 or older | 1.06 (0.87-1.28) | 0.99 (0.85-1.15) | 1.00 (1.00-1.00) | 1.01 (0.86-1.17) | 0.94 (0.81-1.08) | 0.88 (0.72-1.08) | 0.95 (0.73-1.23) |
| South America   | Chile      | Total            | 1.17 (1.09-1.25) | 1.01 (0.97-1.06) | 1.00 (1.00-1.00) | 1.02 (0.98-1.06) | 1.02 (0.96-1.07) | 1.25 (1.10-1.43) | 1.43 (1.24-1.66) |

|                  |              |                  |                  |                  |                  |                  |                  |                  |                  |
|------------------|--------------|------------------|------------------|------------------|------------------|------------------|------------------|------------------|------------------|
| South America    | Chile        | Male             | 1.15 (1.08-1.23) | 1.02 (0.97-1.08) | 1.00 (1.00-1.00) | 1.03 (0.97-1.09) | 1.06 (1.00-1.12) | 1.30 (1.13-1.50) | 1.35 (1.19-1.53) |
| South America    | Chile        | Female           | 1.09 (0.98-1.21) | 0.94 (0.85-1.05) | 1.00 (1.00-1.00) | 0.96 (0.87-1.05) | 0.96 (0.87-1.06) | 1.15 (0.92-1.43) | 1.44 (1.13-1.83) |
| South America    | Chile        | Aged 0-64        | 1.17 (1.10-1.25) | 1.02 (0.98-1.07) | 1.00 (1.00-1.00) | 1.00 (0.95-1.06) | 1.02 (0.96-1.09) | 1.34 (1.14-1.56) | 1.47 (1.27-1.70) |
| South America    | Chile        | Aged 65 or older | 1.02 (0.83-1.26) | 0.97 (0.83-1.13) | 1.00 (1.00-1.00) | 0.99 (0.84-1.15) | 0.92 (0.79-1.07) | 0.84 (0.67-1.05) | 0.86 (0.64-1.17) |
| South America    | Ecuador      | Total            | 1.14 (1.06-1.23) | 1.02 (0.98-1.06) | 1.00 (1.00-1.00) | 1.02 (0.98-1.07) | 1.02 (0.97-1.08) | 1.17 (1.01-1.35) | 1.28 (1.08-1.51) |
| South America    | Ecuador      | Male             | 1.14 (1.07-1.23) | 1.03 (0.98-1.09) | 1.00 (1.00-1.00) | 1.04 (0.98-1.11) | 1.06 (1.00-1.12) | 1.25 (1.06-1.46) | 1.29 (1.13-1.48) |
| South America    | Ecuador      | Female           | 1.07 (0.96-1.18) | 0.95 (0.86-1.05) | 1.00 (1.00-1.00) | 0.95 (0.87-1.04) | 0.93 (0.84-1.03) | 0.99 (0.78-1.26) | 1.17 (0.89-1.53) |
| South America    | Ecuador      | Aged 0-64        | 1.16 (1.08-1.23) | 1.03 (0.98-1.07) | 1.00 (1.00-1.00) | 1.02 (0.96-1.07) | 1.02 (0.96-1.10) | 1.22 (1.02-1.45) | 1.32 (1.12-1.56) |
| South America    | Ecuador      | Aged 65 or older | 1.02 (0.82-1.26) | 0.97 (0.83-1.14) | 1.00 (1.00-1.00) | 0.99 (0.84-1.15) | 0.92 (0.79-1.07) | 0.84 (0.66-1.08) | 0.86 (0.62-1.20) |
| South America    | Paraguay     | Total            | 1.15 (1.06-1.25) | 1.02 (0.97-1.07) | 1.00 (1.00-1.00) | 1.02 (0.98-1.06) | 1.01 (0.96-1.07) | 1.08 (0.90-1.29) | 1.18 (0.97-1.45) |
| Africa & Oceania | Australia    | Total            | 1.09 (0.98-1.21) | 1.05 (0.97-1.15) | 1.00 (1.00-1.00) | 0.96 (0.88-1.04) | 0.96 (0.87-1.05) | 0.85 (0.70-1.03) | 0.89 (0.72-1.10) |
| Africa & Oceania | Australia    | Male             | 1.13 (1.02-1.26) | 1.05 (0.95-1.16) | 1.00 (1.00-1.00) | 0.97 (0.87-1.07) | 0.98 (0.89-1.08) | 0.85 (0.70-1.04) | 0.93 (0.78-1.11) |
| Africa & Oceania | Australia    | Female           | 1.08 (0.90-1.30) | 1.10 (0.92-1.32) | 1.00 (1.00-1.00) | 0.99 (0.82-1.18) | 0.89 (0.74-1.07) | 0.93 (0.70-1.25) | 0.98 (0.71-1.35) |
| Africa & Oceania | Australia    | Aged 0-64        | 1.10 (1.00-1.21) | 1.04 (0.95-1.13) | 1.00 (1.00-1.00) | 0.98 (0.89-1.07) | 0.97 (0.88-1.07) | 0.85 (0.69-1.05) | 0.95 (0.78-1.16) |
| Africa & Oceania | Australia    | Aged 65 or older | 1.05 (0.75-1.47) | 1.10 (0.81-1.49) | 1.00 (1.00-1.00) | 0.91 (0.67-1.25) | 0.82 (0.60-1.13) | 1.04 (0.73-1.48) | 0.70 (0.45-1.08) |
| Africa & Oceania | South Africa | Total            | 1.10 (0.99-1.22) | 1.05 (0.96-1.14) | 1.00 (1.00-1.00) | 0.96 (0.88-1.05) | 0.98 (0.90-1.08) | 1.13 (0.95-1.35) | 1.23 (1.01-1.49) |
| Africa & Oceania | South Africa | Male             | 1.08 (0.97-1.20) | 1.02 (0.93-1.13) | 1.00 (1.00-1.00) | 0.95 (0.86-1.05) | 1.00 (0.90-1.10) | 1.10 (0.92-1.33) | 1.17 (0.99-1.37) |
| Africa & Oceania | South Africa | Female           | 1.11 (0.93-1.33) | 1.10 (0.92-1.32) | 1.00 (1.00-1.00) | 1.00 (0.84-1.20) | 0.93 (0.77-1.12) | 1.18 (0.90-1.55) | 1.34 (1.00-1.80) |
| Africa & Oceania | South Africa | Aged 0-64        | 1.10 (1.00-1.21) | 1.04 (0.95-1.13) | 1.00 (1.00-1.00) | 0.96 (0.88-1.06) | 0.99 (0.90-1.10) | 1.11 (0.91-1.36) | 1.23 (1.02-1.48) |
| Africa & Oceania | South Africa | Aged 65 or older | 1.05 (0.75-1.46) | 1.11 (0.82-1.50) | 1.00 (1.00-1.00) | 0.91 (0.67-1.25) | 0.83 (0.60-1.14) | 1.28 (0.90-1.82) | 0.92 (0.60-1.41) |
| Asia             | China        | Total            | 1.07 (1.00-1.14) | 1.02 (1.01-1.04) | 1.00 (1.00-1.00) | 0.99 (0.98-1.00) | 0.98 (0.94-1.02) | 0.93 (0.81-1.07) | 0.94 (0.80-1.11) |
| Asia             | China        | Male             | 1.08 (1.03-1.14) | 1.03 (1.00-1.06) | 1.00 (1.00-1.00) | 0.99 (0.96-1.03) | 0.96 (0.93-1.00) | 0.88 (0.76-1.04) | 0.91 (0.80-1.04) |
| Asia             | China        | Female           | 1.06 (1.00-1.13) | 1.03 (0.98-1.09) | 1.00 (1.00-1.00) | 0.99 (0.96-1.02) | 1.01 (0.97-1.06) | 1.01 (0.83-1.23) | 1.00 (0.80-1.26) |
| Asia             | China        | Aged 0-64        | 1.08 (1.03-1.13) | 1.02 (1.01-1.04) | 1.00 (1.00-1.00) | 0.98 (0.95-1.01) | 0.97 (0.93-1.02) | 0.94 (0.80-1.12) | 0.96 (0.82-1.12) |
| Asia             | China        | Aged 65 or older | 1.05 (0.90-1.21) | 1.01 (0.94-1.09) | 1.00 (1.00-1.00) | 0.99 (0.92-1.06) | 0.98 (0.92-1.03) | 0.89 (0.75-1.05) | 0.91 (0.71-1.17) |
| Asia             | Japan        | Total            | 1.10 (1.06-1.14) | 1.02 (1.01-1.03) | 1.00 (1.00-1.00) | 0.99 (0.98-1.00) | 0.98 (0.95-1.00) | 0.88 (0.80-0.96) | 0.91 (0.82-1.01) |

|        |             |                  |                  |                  |                  |                  |                  |                  |                  |
|--------|-------------|------------------|------------------|------------------|------------------|------------------|------------------|------------------|------------------|
| Asia   | Japan       | Male             | 1.12 (1.08-1.15) | 1.02 (1.01-1.04) | 1.00 (1.00-1.00) | 0.98 (0.96-1.00) | 0.96 (0.94-0.98) | 0.85 (0.78-0.93) | 0.89 (0.82-0.96) |
| Asia   | Japan       | Female           | 1.07 (1.03-1.10) | 1.01 (0.98-1.04) | 1.00 (1.00-1.00) | 0.99 (0.97-1.01) | 1.00 (0.97-1.03) | 0.93 (0.82-1.06) | 0.94 (0.81-1.10) |
| Asia   | Japan       | Aged 0-64        | 1.11 (1.08-1.14) | 1.02 (1.01-1.03) | 1.00 (1.00-1.00) | 0.98 (0.97-1.00) | 0.97 (0.94-1.00) | 0.86 (0.78-0.95) | 0.89 (0.81-0.98) |
| Asia   | Japan       | Aged 65 or older | 1.07 (0.99-1.17) | 1.01 (0.97-1.06) | 1.00 (1.00-1.00) | 0.99 (0.95-1.03) | 0.99 (0.96-1.02) | 0.92 (0.83-1.02) | 0.96 (0.83-1.11) |
| Asia   | Korea       | Total            | 1.07 (1.03-1.11) | 1.03 (1.02-1.04) | 1.00 (1.00-1.00) | 0.98 (0.97-0.99) | 0.96 (0.94-0.98) | 0.87 (0.80-0.96) | 0.89 (0.81-0.99) |
| Asia   | Korea       | Male             | 1.08 (1.05-1.11) | 1.04 (1.02-1.06) | 1.00 (1.00-1.00) | 0.99 (0.97-1.01) | 0.95 (0.93-0.97) | 0.86 (0.78-0.94) | 0.89 (0.82-0.96) |
| Asia   | Korea       | Female           | 1.05 (1.01-1.10) | 1.01 (0.97-1.05) | 1.00 (1.00-1.00) | 0.98 (0.96-1.01) | 0.99 (0.96-1.03) | 0.90 (0.78-1.05) | 0.91 (0.77-1.08) |
| Asia   | Korea       | Aged 0-64        | 1.07 (1.04-1.10) | 1.03 (1.02-1.04) | 1.00 (1.00-1.00) | 0.98 (0.96-1.00) | 0.95 (0.92-0.98) | 0.86 (0.77-0.95) | 0.87 (0.79-0.96) |
| Asia   | Korea       | Aged 65 or older | 1.08 (0.99-1.17) | 1.04 (0.99-1.09) | 1.00 (1.00-1.00) | 1.01 (0.96-1.05) | 0.99 (0.96-1.02) | 0.92 (0.83-1.02) | 0.98 (0.84-1.14) |
| Asia   | Philippines | Total            | 1.10 (1.04-1.17) | 1.02 (1.00-1.03) | 1.00 (1.00-1.00) | 0.99 (0.97-1.00) | 0.98 (0.95-1.01) | 1.03 (0.91-1.16) | 1.10 (0.96-1.26) |
| Asia   | Philippines | Male             | 1.07 (1.02-1.12) | 1.01 (0.99-1.04) | 1.00 (1.00-1.00) | 0.98 (0.95-1.01) | 0.97 (0.94-1.00) | 1.00 (0.87-1.14) | 1.01 (0.90-1.14) |
| Asia   | Philippines | Female           | 1.12 (1.02-1.22) | 1.03 (0.94-1.13) | 1.00 (1.00-1.00) | 0.98 (0.91-1.06) | 1.02 (0.94-1.11) | 1.10 (0.88-1.36) | 1.10 (0.86-1.41) |
| Asia   | Philippines | Aged 0-64        | 1.09 (1.04-1.14) | 1.02 (1.01-1.03) | 1.00 (1.00-1.00) | 0.97 (0.94-1.00) | 0.98 (0.94-1.03) | 1.05 (0.91-1.20) | 1.06 (0.94-1.21) |
| Asia   | Philippines | Aged 65 or older | 1.07 (0.92-1.25) | 1.03 (0.95-1.11) | 1.00 (1.00-1.00) | 1.00 (0.92-1.08) | 0.99 (0.93-1.05) | 0.95 (0.79-1.15) | 1.01 (0.76-1.34) |
| Asia   | Taiwan      | Total            | 1.06 (1.02-1.11) | 1.03 (1.01-1.04) | 1.00 (1.00-1.00) | 0.99 (0.98-1.00) | 0.98 (0.95-1.01) | 0.89 (0.81-0.98) | 0.89 (0.79-0.99) |
| Asia   | Taiwan      | Male             | 1.07 (1.04-1.11) | 1.03 (1.01-1.05) | 1.00 (1.00-1.00) | 1.00 (0.97-1.03) | 0.97 (0.94-1.00) | 0.89 (0.81-0.98) | 0.91 (0.84-0.99) |
| Asia   | Taiwan      | Female           | 1.08 (1.01-1.15) | 1.02 (0.96-1.08) | 1.00 (1.00-1.00) | 0.98 (0.93-1.03) | 0.98 (0.93-1.04) | 0.89 (0.77-1.03) | 0.87 (0.74-1.03) |
| Asia   | Taiwan      | Aged 0-64        | 1.07 (1.04-1.11) | 1.03 (1.01-1.04) | 1.00 (1.00-1.00) | 0.99 (0.97-1.01) | 0.98 (0.94-1.02) | 0.88 (0.79-0.98) | 0.89 (0.80-0.98) |
| Asia   | Taiwan      | Aged 65 or older | 1.06 (0.95-1.19) | 1.03 (0.97-1.09) | 1.00 (1.00-1.00) | 1.00 (0.94-1.06) | 0.98 (0.94-1.02) | 0.91 (0.81-1.01) | 0.95 (0.80-1.12) |
| Asia   | Vietnam     | Total            | 1.08 (1.00-1.15) | 1.02 (1.01-1.04) | 1.00 (1.00-1.00) | 0.99 (0.97-1.00) | 0.98 (0.94-1.02) | 0.94 (0.79-1.12) | 0.96 (0.79-1.17) |
| Asia   | Vietnam     | Male             | 1.08 (1.03-1.14) | 1.02 (1.00-1.05) | 1.00 (1.00-1.00) | 0.99 (0.95-1.02) | 0.97 (0.93-1.00) | 0.91 (0.76-1.09) | 0.94 (0.81-1.09) |
| Asia   | Vietnam     | Female           | 1.09 (0.99-1.20) | 1.04 (0.95-1.15) | 1.00 (1.00-1.00) | 0.98 (0.91-1.06) | 1.01 (0.92-1.11) | 1.04 (0.79-1.37) | 1.01 (0.74-1.38) |
| Asia   | Vietnam     | Aged 0-64        | 1.08 (1.03-1.13) | 1.02 (1.01-1.04) | 1.00 (1.00-1.00) | 0.98 (0.95-1.01) | 0.98 (0.93-1.03) | 0.97 (0.80-1.17) | 0.98 (0.82-1.17) |
| Asia   | Vietnam     | Aged 65 or older | 1.07 (0.91-1.25) | 1.02 (0.95-1.11) | 1.00 (1.00-1.00) | 1.00 (0.92-1.08) | 0.98 (0.93-1.04) | 0.89 (0.73-1.10) | 0.93 (0.69-1.26) |
| Europe | Czech       | Total            | 1.11 (1.06-1.17) | 1.01 (0.99-1.03) | 1.00 (1.00-1.00) | 0.98 (0.96-1.00) | 0.96 (0.93-0.99) | 0.88 (0.80-0.97) | 0.90 (0.81-1.01) |
| Europe | Czech       | Male             | 1.12 (1.07-1.17) | 1.03 (1.00-1.06) | 1.00 (1.00-1.00) | 0.98 (0.95-1.01) | 0.95 (0.92-0.99) | 0.86 (0.77-0.95) | 0.87 (0.80-0.95) |

|        |         |                  |                  |                  |                  |                  |                  |                  |                  |
|--------|---------|------------------|------------------|------------------|------------------|------------------|------------------|------------------|------------------|
| Europe | Czech   | Female           | 1.10 (1.03-1.17) | 0.99 (0.93-1.05) | 1.00 (1.00-1.00) | 0.99 (0.95-1.04) | 0.99 (0.94-1.04) | 0.95 (0.81-1.12) | 1.00 (0.84-1.21) |
| Europe | Czech   | Aged 0-64        | 1.10 (1.05-1.16) | 1.01 (0.99-1.04) | 1.00 (1.00-1.00) | 0.98 (0.95-1.01) | 0.95 (0.90-1.00) | 0.90 (0.70-1.15) | 0.91 (0.72-1.15) |
| Europe | Czech   | Aged 65 or older | 1.12 (0.99-1.27) | 1.04 (0.97-1.11) | 1.00 (1.00-1.00) | 0.99 (0.93-1.06) | 0.99 (0.93-1.04) | 0.83 (0.74-0.94) | 0.88 (0.74-1.06) |
| Europe | Estonia | Total            | 1.11 (1.04-1.18) | 1.01 (0.99-1.04) | 1.00 (1.00-1.00) | 0.98 (0.96-1.00) | 0.96 (0.93-1.00) | 0.96 (0.84-1.10) | 0.99 (0.85-1.15) |
| Europe | Estonia | Male             | 1.09 (1.04-1.14) | 1.02 (0.99-1.05) | 1.00 (1.00-1.00) | 0.97 (0.94-1.01) | 0.96 (0.93-1.00) | 0.96 (0.84-1.11) | 0.96 (0.85-1.09) |
| Europe | Estonia | Female           | 1.10 (1.02-1.18) | 0.97 (0.91-1.05) | 1.00 (1.00-1.00) | 0.99 (0.94-1.04) | 0.98 (0.92-1.05) | 0.89 (0.72-1.11) | 0.96 (0.75-1.24) |
| Europe | Estonia | Aged 0-64        | 1.10 (1.05-1.15) | 1.01 (0.99-1.04) | 1.00 (1.00-1.00) | 0.97 (0.94-1.01) | 0.96 (0.92-1.01) | 1.01 (0.87-1.19) | 1.02 (0.88-1.18) |
| Europe | Estonia | Aged 65 or older | 1.12 (0.97-1.30) | 1.04 (0.97-1.12) | 1.00 (1.00-1.00) | 0.99 (0.92-1.08) | 0.99 (0.93-1.05) | 0.84 (0.72-0.99) | 0.90 (0.71-1.14) |
| Europe | Finland | Total            | 1.06 (1.02-1.09) | 1.02 (1.00-1.04) | 1.00 (1.00-1.00) | 0.98 (0.97-1.00) | 0.99 (0.96-1.01) | 1.09 (1.01-1.17) | 1.07 (0.98-1.16) |
| Europe | Finland | Male             | 1.05 (1.02-1.09) | 1.02 (0.99-1.04) | 1.00 (1.00-1.00) | 0.98 (0.95-1.01) | 0.98 (0.95-1.00) | 1.08 (1.00-1.17) | 1.05 (0.99-1.13) |
| Europe | Finland | Female           | 1.09 (1.04-1.15) | 1.04 (0.99-1.10) | 1.00 (1.00-1.00) | 1.01 (0.96-1.05) | 1.02 (0.97-1.07) | 1.11 (0.99-1.26) | 1.11 (0.96-1.27) |
| Europe | Finland | Aged 0-64        | 1.07 (1.03-1.10) | 1.02 (1.00-1.04) | 1.00 (1.00-1.00) | 0.99 (0.96-1.01) | 0.99 (0.96-1.03) | 1.12 (1.02-1.22) | 1.08 (1.00-1.18) |
| Europe | Finland | Aged 65 or older | 1.02 (0.93-1.12) | 1.01 (0.95-1.07) | 1.00 (1.00-1.00) | 0.95 (0.90-1.01) | 0.96 (0.92-1.01) | 0.93 (0.85-1.01) | 0.96 (0.84-1.09) |
| Europe | Germany | Total            | 1.13 (1.07-1.19) | 1.01 (0.99-1.03) | 1.00 (1.00-1.00) | 0.97 (0.95-0.99) | 0.94 (0.91-0.97) | 0.78 (0.70-0.87) | 0.82 (0.73-0.92) |
| Europe | Germany | Male             | 1.14 (1.09-1.19) | 1.04 (1.01-1.07) | 1.00 (1.00-1.00) | 0.98 (0.95-1.02) | 0.94 (0.91-0.98) | 0.77 (0.69-0.86) | 0.80 (0.73-0.88) |
| Europe | Germany | Female           | 1.10 (1.03-1.16) | 0.97 (0.91-1.03) | 1.00 (1.00-1.00) | 0.98 (0.94-1.02) | 0.96 (0.91-1.01) | 0.82 (0.70-0.96) | 0.87 (0.73-1.03) |
| Europe | Germany | Aged 0-64        | 1.12 (1.07-1.17) | 1.01 (0.99-1.03) | 1.00 (1.00-1.00) | 0.98 (0.95-1.01) | 0.93 (0.89-0.97) | 0.75 (0.67-0.85) | 0.78 (0.69-0.87) |
| Europe | Germany | Aged 65 or older | 1.19 (1.05-1.35) | 1.07 (1.00-1.15) | 1.00 (1.00-1.00) | 1.02 (0.95-1.10) | 1.01 (0.95-1.07) | 0.87 (0.76-0.98) | 0.96 (0.80-1.16) |
| Europe | Italy   | Total            | 1.10 (1.03-1.17) | 1.02 (0.99-1.04) | 1.00 (1.00-1.00) | 0.98 (0.96-1.00) | 0.96 (0.93-1.00) | 0.89 (0.79-1.01) | 0.90 (0.78-1.03) |
| Europe | Italy   | Male             | 1.10 (1.05-1.15) | 1.04 (1.01-1.07) | 1.00 (1.00-1.00) | 0.99 (0.95-1.02) | 0.96 (0.93-0.99) | 0.87 (0.76-0.99) | 0.88 (0.78-0.98) |
| Europe | Italy   | Female           | 1.13 (1.06-1.20) | 0.99 (0.93-1.05) | 1.00 (1.00-1.00) | 0.98 (0.94-1.03) | 0.98 (0.93-1.04) | 0.96 (0.79-1.16) | 1.01 (0.81-1.26) |
| Europe | Italy   | Aged 0-64        | 1.10 (1.05-1.15) | 1.01 (0.99-1.04) | 1.00 (1.00-1.00) | 0.98 (0.95-1.01) | 0.95 (0.90-1.00) | 0.86 (0.74-1.00) | 0.87 (0.76-1.01) |
| Europe | Italy   | Aged 65 or older | 1.12 (0.98-1.29) | 1.04 (0.97-1.12) | 1.00 (1.00-1.00) | 0.99 (0.92-1.07) | 0.99 (0.93-1.05) | 0.89 (0.77-1.03) | 0.96 (0.77-1.20) |
| Europe | Romania | Total            | 1.13 (1.08-1.19) | 1.01 (0.99-1.03) | 1.00 (1.00-1.00) | 0.97 (0.96-0.99) | 0.94 (0.91-0.98) | 0.84 (0.77-0.93) | 0.89 (0.80-0.99) |
| Europe | Romania | Male             | 1.11 (1.07-1.16) | 1.03 (1.01-1.06) | 1.00 (1.00-1.00) | 0.98 (0.95-1.02) | 0.96 (0.93-0.99) | 0.86 (0.78-0.94) | 0.87 (0.80-0.95) |
| Europe | Romania | Female           | 1.10 (1.04-1.17) | 0.97 (0.92-1.03) | 1.00 (1.00-1.00) | 0.98 (0.94-1.02) | 0.96 (0.92-1.01) | 0.84 (0.72-0.99) | 0.89 (0.74-1.06) |

|        |             |                  |                  |                  |                  |                  |                  |                  |                  |
|--------|-------------|------------------|------------------|------------------|------------------|------------------|------------------|------------------|------------------|
| Europe | Romania     | Aged 0-64        | 1.12 (1.07-1.17) | 1.01 (0.99-1.03) | 1.00 (1.00-1.00) | 0.98 (0.95-1.01) | 0.94 (0.90-0.98) | 0.85 (0.76-0.95) | 0.87 (0.78-0.97) |
| Europe | Romania     | Aged 65 or older | 1.13 (1.00-1.29) | 1.05 (0.97-1.12) | 1.00 (1.00-1.00) | 1.00 (0.93-1.07) | 0.99 (0.94-1.05) | 0.85 (0.74-0.96) | 0.90 (0.75-1.09) |
| Europe | Spain       | Total            | 1.10 (1.06-1.15) | 1.01 (0.99-1.03) | 1.00 (1.00-1.00) | 0.98 (0.96-1.00) | 0.97 (0.94-1.00) | 0.92 (0.85-1.00) | 0.94 (0.86-1.02) |
| Europe | Spain       | Male             | 1.09 (1.05-1.13) | 1.03 (1.00-1.06) | 1.00 (1.00-1.00) | 0.99 (0.96-1.02) | 0.97 (0.94-1.00) | 0.92 (0.85-1.00) | 0.92 (0.86-0.99) |
| Europe | Spain       | Female           | 1.14 (1.08-1.20) | 0.97 (0.92-1.02) | 1.00 (1.00-1.00) | 0.98 (0.93-1.02) | 0.97 (0.92-1.02) | 0.90 (0.79-1.03) | 0.98 (0.84-1.13) |
| Europe | Spain       | Aged 0-64        | 1.11 (1.07-1.15) | 1.01 (0.99-1.03) | 1.00 (1.00-1.00) | 0.98 (0.96-1.01) | 0.96 (0.93-1.00) | 0.92 (0.84-1.02) | 0.93 (0.85-1.02) |
| Europe | Spain       | Aged 65 or older | 1.07 (0.97-1.17) | 1.01 (0.96-1.08) | 1.00 (1.00-1.00) | 0.96 (0.91-1.02) | 0.97 (0.93-1.02) | 0.89 (0.81-0.97) | 0.93 (0.81-1.06) |
| Europe | Switzerland | Total            | 1.10 (1.06-1.14) | 1.02 (1.00-1.04) | 1.00 (1.00-1.00) | 0.97 (0.96-0.99) | 0.95 (0.92-0.97) | 0.78 (0.72-0.84) | 0.78 (0.72-0.85) |
| Europe | Switzerland | Male             | 1.13 (1.09-1.17) | 1.04 (1.01-1.06) | 1.00 (1.00-1.00) | 0.98 (0.95-1.01) | 0.95 (0.92-0.98) | 0.81 (0.75-0.87) | 0.83 (0.78-0.89) |
| Europe | Switzerland | Female           | 1.04 (0.99-1.09) | 0.99 (0.94-1.04) | 1.00 (1.00-1.00) | 0.98 (0.94-1.02) | 0.94 (0.90-0.99) | 0.73 (0.65-0.82) | 0.71 (0.62-0.80) |
| Europe | Switzerland | Aged 0-64        | 1.12 (1.08-1.16) | 1.01 (0.99-1.03) | 1.00 (1.00-1.00) | 0.97 (0.95-1.00) | 0.94 (0.90-0.97) | 0.84 (0.77-0.92) | 0.86 (0.79-0.94) |
| Europe | Switzerland | Aged 65 or older | 1.03 (0.95-1.12) | 0.99 (0.93-1.04) | 1.00 (1.00-1.00) | 0.95 (0.90-1.00) | 0.95 (0.90-0.99) | 0.66 (0.61-0.72) | 0.62 (0.55-0.70) |
| Europe | UK          | Total            | 1.12 (1.08-1.16) | 1.01 (0.99-1.03) | 1.00 (1.00-1.00) | 0.98 (0.96-1.00) | 0.96 (0.93-0.98) | 0.89 (0.82-0.96) | 0.92 (0.84-1.00) |
| Europe | UK          | Male             | 1.12 (1.08-1.16) | 1.02 (1.00-1.04) | 1.00 (1.00-1.00) | 0.97 (0.94-0.99) | 0.95 (0.93-0.98) | 0.90 (0.84-0.98) | 0.92 (0.86-0.98) |
| Europe | UK          | Female           | 1.11 (1.06-1.16) | 0.96 (0.92-1.01) | 1.00 (1.00-1.00) | 0.98 (0.94-1.02) | 0.96 (0.92-1.00) | 0.83 (0.74-0.93) | 0.89 (0.79-1.01) |
| Europe | UK          | Aged 0-64        | 1.11 (1.07-1.15) | 1.01 (0.99-1.03) | 1.00 (1.00-1.00) | 0.97 (0.95-1.00) | 0.95 (0.91-0.98) | 0.90 (0.82-0.99) | 0.92 (0.84-1.00) |
| Europe | UK          | Aged 65 or older | 1.26 (1.15-1.38) | 1.09 (1.03-1.15) | 1.00 (1.00-1.00) | 1.05 (0.99-1.11) | 1.03 (0.98-1.08) | 0.85 (0.78-0.93) | 0.97 (0.86-1.11) |

**Table S6.** Risks of suicide during Christmas season (reference days: non-holidays which are not included in New Year’s Day, Christmas, and other national holidays that this study addressed) for 26 countries with the corresponding 95% confidence intervals (vertical lines)

| Region          | Country       | Subgroup  | RR (95% CI)      |                  |                  |                  |                  |
|-----------------|---------------|-----------|------------------|------------------|------------------|------------------|------------------|
|                 |               |           | Day -2           | Day -1           | Day 0            | Day +1           | Day +2           |
| North America   | Canada        | Total     | 0.94 (0.80-1.09) | 0.95 (0.77-1.17) | 0.79 (0.52-1.22) | 0.78 (0.61-0.98) | 0.87 (0.70-1.08) |
| North America   | Canada        | Male      | 0.94 (0.81-1.08) | 0.97 (0.81-1.16) | 0.74 (0.51-1.05) | 0.74 (0.57-0.95) | 0.82 (0.65-1.04) |
| North America   | Canada        | Female    | 0.82 (0.60-1.11) | 0.80 (0.56-1.13) | 1.01 (0.56-1.82) | 0.94 (0.61-1.45) | 0.93 (0.62-1.37) |
| North America   | Canada        | Aged 0-64 | 0.93 (0.78-1.12) | 0.93 (0.76-1.15) | 0.76 (0.51-1.12) | 0.78 (0.62-0.97) | 0.89 (0.74-1.06) |
| North America   | United States | Total     | 0.84 (0.73-0.98) | 0.93 (0.76-1.14) | 0.75 (0.49-1.13) | 0.95 (0.76-1.18) | 0.97 (0.78-1.19) |
| North America   | United States | Male      | 0.86 (0.75-0.99) | 0.92 (0.78-1.10) | 0.70 (0.50-0.99) | 0.97 (0.76-1.23) | 0.99 (0.80-1.23) |
| North America   | United States | Female    | 0.86 (0.65-1.15) | 1.04 (0.76-1.43) | 0.88 (0.50-1.56) | 0.86 (0.58-1.29) | 0.92 (0.63-1.34) |
| North America   | United States | Aged 0-64 | 0.84 (0.70-1.00) | 0.98 (0.81-1.20) | 0.80 (0.55-1.16) | 0.92 (0.75-1.13) | 0.95 (0.80-1.13) |
| Central America | Costa Rica    | Total     | 0.84 (0.64-1.10) | 0.98 (0.72-1.34) | 1.24 (0.69-2.20) | 1.21 (0.87-1.68) | 1.19 (0.87-1.64) |
| Central America | Guatemala     | Total     | 0.85 (0.64-1.12) | 1.02 (0.73-1.44) | 1.41 (0.71-2.81) | 1.20 (0.85-1.71) | 1.17 (0.84-1.64) |
| Central America | Mexico        | Total     | 0.87 (0.67-1.13) | 1.06 (0.80-1.41) | 1.61 (0.99-2.60) | 1.20 (0.88-1.62) | 1.16 (0.86-1.55) |
| Central America | Mexico        | Male      | 0.97 (0.73-1.29) | 1.03 (0.76-1.41) | 1.91 (1.21-3.03) | 1.20 (0.82-1.74) | 1.19 (0.84-1.69) |
| Central America | Mexico        | Female    | 0.58 (0.29-1.19) | 0.68 (0.34-1.38) | 0.68 (0.26-1.76) | 1.12 (0.58-2.17) | 1.18 (0.63-2.20) |
| Central America | Mexico        | Aged 0-64 | 0.91 (0.67-1.24) | 0.99 (0.71-1.38) | 1.69 (1.01-2.82) | 1.16 (0.84-1.60) | 1.25 (0.94-1.65) |
| South America   | Brazil        | Total     | 0.89 (0.69-1.15) | 0.92 (0.70-1.23) | 1.19 (0.77-1.84) | 0.94 (0.68-1.29) | 1.16 (0.87-1.54) |
| South America   | Brazil        | Male      | 0.79 (0.59-1.06) | 1.05 (0.79-1.38) | 1.35 (0.92-1.97) | 0.92 (0.63-1.32) | 1.26 (0.94-1.70) |
| South America   | Brazil        | Female    | 1.10 (0.70-1.74) | 0.63 (0.35-1.13) | 0.94 (0.46-1.92) | 0.99 (0.58-1.70) | 0.87 (0.50-1.51) |

|                             |                     |                  |                  |                  |                  |                  |                  |
|-----------------------------|---------------------|------------------|------------------|------------------|------------------|------------------|------------------|
| <b>South America</b>        | <b>Brazil</b>       | <b>Aged 0-64</b> | 0.95 (0.72-1.26) | 0.94 (0.71-1.27) | 1.26 (0.84-1.89) | 0.89 (0.65-1.22) | 1.23 (0.96-1.57) |
| <b>South America</b>        | <b>Chile</b>        | <b>Total</b>     | 0.97 (0.75-1.27) | 1.03 (0.76-1.39) | 1.81 (1.11-2.95) | 0.85 (0.60-1.22) | 1.05 (0.77-1.43) |
| <b>South America</b>        | <b>Chile</b>        | <b>Male</b>      | 0.83 (0.62-1.11) | 1.13 (0.85-1.50) | 1.74 (1.13-2.67) | 0.82 (0.55-1.21) | 1.12 (0.81-1.55) |
| <b>South America</b>        | <b>Chile</b>        | <b>Female</b>    | 1.06 (0.65-1.71) | 0.55 (0.30-1.02) | 1.32 (0.60-2.94) | 1.22 (0.67-2.20) | 1.00 (0.55-1.83) |
| <b>South America</b>        | <b>Chile</b>        | <b>Aged 0-64</b> | 1.02 (0.76-1.36) | 1.06 (0.78-1.44) | 1.88 (1.19-2.97) | 0.87 (0.63-1.21) | 1.23 (0.95-1.58) |
| <b>South America</b>        | <b>Ecuador</b>      | <b>Total</b>     | 0.94 (0.72-1.23) | 0.88 (0.64-1.21) | 1.18 (0.66-2.11) | 0.83 (0.57-1.18) | 1.03 (0.75-1.42) |
| <b>South America</b>        | <b>Ecuador</b>      | <b>Male</b>      | 0.82 (0.61-1.10) | 1.05 (0.79-1.41) | 1.40 (0.87-2.24) | 0.82 (0.55-1.22) | 1.14 (0.82-1.58) |
| <b>South America</b>        | <b>Ecuador</b>      | <b>Female</b>    | 1.08 (0.68-1.71) | 0.61 (0.34-1.10) | 1.13 (0.48-2.64) | 1.11 (0.61-2.01) | 0.95 (0.51-1.74) |
| <b>South America</b>        | <b>Ecuador</b>      | <b>Aged 0-64</b> | 1.00 (0.74-1.35) | 0.93 (0.67-1.28) | 1.31 (0.78-2.22) | 0.85 (0.61-1.19) | 1.18 (0.91-1.54) |
| <b>South America</b>        | <b>Paraguay</b>     | <b>Total</b>     | 0.94 (0.71-1.23) | 0.92 (0.66-1.28) | 1.28 (0.68-2.42) | 0.85 (0.59-1.23) | 1.06 (0.77-1.47) |
| <b>Africa &amp; Oceania</b> | <b>Australia</b>    | <b>Total</b>     | 1.73 (1.24-2.41) | 1.19 (0.75-1.89) | 1.37 (0.67-2.79) | 1.40 (0.89-2.21) | 1.31 (0.81-2.10) |
| <b>Africa &amp; Oceania</b> | <b>Australia</b>    | <b>Male</b>      | 1.71 (1.19-2.47) | 1.56 (0.98-2.46) | 1.80 (0.97-3.32) | 1.29 (0.77-2.17) | 1.42 (0.86-2.36) |
| <b>Africa &amp; Oceania</b> | <b>Australia</b>    | <b>Female</b>    | 1.91 (1.02-3.56) | 0.72 (0.27-1.88) | 1.16 (0.38-3.49) | 2.04 (0.91-4.57) | 1.10 (0.39-3.05) |
| <b>Africa &amp; Oceania</b> | <b>Australia</b>    | <b>Aged 0-64</b> | 1.64 (1.13-2.37) | 1.36 (0.86-2.14) | 1.69 (0.88-3.22) | 1.45 (0.93-2.24) | 1.31 (0.85-2.04) |
| <b>Africa &amp; Oceania</b> | <b>South Africa</b> | <b>Total</b>     | 1.81 (1.31-2.52) | 1.33 (0.85-2.08) | 1.89 (1.01-3.56) | 1.38 (0.89-2.15) | 1.28 (0.81-2.04) |
| <b>Africa &amp; Oceania</b> | <b>South Africa</b> | <b>Male</b>      | 1.75 (1.21-2.52) | 1.66 (1.05-2.61) | 2.17 (1.21-3.86) | 1.25 (0.75-2.07) | 1.37 (0.83-2.25) |
| <b>Africa &amp; Oceania</b> | <b>South Africa</b> | <b>Female</b>    | 1.87 (1.01-3.47) | 0.61 (0.24-1.60) | 1.13 (0.39-3.23) | 2.03 (0.93-4.42) | 1.05 (0.38-2.87) |
| <b>Africa &amp; Oceania</b> | <b>South Africa</b> | <b>Aged 0-64</b> | 1.69 (1.18-2.44) | 1.44 (0.92-2.24) | 2.09 (1.16-3.77) | 1.43 (0.93-2.20) | 1.31 (0.85-2.03) |
| <b>Asia</b>                 | <b>China</b>        | <b>Total</b>     | 0.97 (0.85-1.11) | 1.07 (0.86-1.33) | 1.34 (0.80-2.23) | 1.01 (0.78-1.30) | 1.01 (0.79-1.28) |
| <b>Asia</b>                 | <b>China</b>        | <b>Male</b>      | 0.96 (0.87-1.06) | 0.92 (0.79-1.09) | 1.05 (0.69-1.59) | 0.99 (0.75-1.30) | 0.98 (0.77-1.25) |



|      |               |           |                  |                  |                  |                  |                  |
|------|---------------|-----------|------------------|------------------|------------------|------------------|------------------|
| Asia | China         | Female    | 0.94 (0.81-1.08) | 1.13 (0.90-1.43) | 1.21 (0.66-2.23) | 1.04 (0.72-1.51) | 1.09 (0.78-1.54) |
| Asia | China         | Aged 0-64 | 0.93 (0.78-1.10) | 0.99 (0.80-1.22) | 1.11 (0.69-1.78) | 0.98 (0.79-1.22) | 0.99 (0.84-1.17) |
| Asia | Japan         | Total     | 0.97 (0.90-1.06) | 0.89 (0.78-1.01) | 0.93 (0.71-1.24) | 0.90 (0.78-1.04) | 0.89 (0.77-1.02) |
| Asia | Japan         | Male      | 0.98 (0.91-1.05) | 0.88 (0.79-0.97) | 0.94 (0.74-1.18) | 0.88 (0.75-1.04) | 0.88 (0.76-1.02) |
| Asia | Japan         | Female    | 0.97 (0.88-1.07) | 0.92 (0.79-1.07) | 0.93 (0.65-1.34) | 0.93 (0.75-1.17) | 0.91 (0.74-1.12) |
| Asia | Japan         | Aged 0-64 | 0.98 (0.88-1.08) | 0.88 (0.77-0.99) | 0.95 (0.74-1.23) | 0.93 (0.82-1.07) | 0.91 (0.82-1.01) |
| Asia | Korea (South) | Total     | 0.94 (0.86-1.03) | 0.92 (0.80-1.06) | 0.86 (0.64-1.16) | 0.96 (0.82-1.14) | 1.01 (0.86-1.18) |
| Asia | Korea (South) | Male      | 0.95 (0.88-1.03) | 0.89 (0.79-1.00) | 0.86 (0.66-1.11) | 1.00 (0.84-1.20) | 1.04 (0.88-1.22) |
| Asia | Korea (South) | Female    | 0.93 (0.82-1.05) | 0.92 (0.76-1.12) | 0.90 (0.59-1.38) | 0.89 (0.68-1.16) | 0.91 (0.71-1.15) |
| Asia | Korea (South) | Aged 0-64 | 0.91 (0.80-1.02) | 0.95 (0.82-1.09) | 0.91 (0.69-1.20) | 0.97 (0.83-1.13) | 1.00 (0.89-1.13) |
| Asia | Philippines   | Total     | 0.99 (0.87-1.12) | 1.02 (0.83-1.26) | 1.25 (0.77-2.02) | 0.95 (0.74-1.23) | 0.96 (0.76-1.22) |
| Asia | Philippines   | Male      | 0.97 (0.88-1.06) | 0.93 (0.79-1.09) | 1.07 (0.72-1.61) | 0.96 (0.73-1.26) | 0.96 (0.76-1.22) |
| Asia | Philippines   | Female    | 1.00 (0.66-1.52) | 1.60 (1.02-2.51) | 1.18 (0.54-2.57) | 1.01 (0.56-1.82) | 1.16 (0.68-1.98) |
| Asia | Philippines   | Aged 0-64 | 0.95 (0.81-1.13) | 0.99 (0.81-1.21) | 1.19 (0.77-1.83) | 0.96 (0.78-1.19) | 0.97 (0.83-1.14) |
| Asia | Taiwan        | Total     | 0.94 (0.84-1.04) | 1.01 (0.86-1.19) | 1.01 (0.71-1.44) | 1.02 (0.83-1.26) | 1.09 (0.90-1.32) |
| Asia | Taiwan        | Male      | 0.94 (0.86-1.03) | 0.89 (0.78-1.03) | 0.92 (0.66-1.28) | 1.04 (0.83-1.30) | 1.04 (0.86-1.28) |
| Asia | Taiwan        | Female    | 0.94 (0.70-1.26) | 1.45 (1.06-1.99) | 1.10 (0.64-1.89) | 0.95 (0.63-1.42) | 1.11 (0.77-1.60) |
| Asia | Taiwan        | Aged 0-64 | 0.88 (0.76-1.02) | 0.99 (0.83-1.17) | 0.96 (0.68-1.36) | 1.01 (0.83-1.21) | 1.03 (0.90-1.19) |
| Asia | Vietnam       | Total     | 0.96 (0.83-1.10) | 0.98 (0.77-1.24) | 1.05 (0.59-1.88) | 0.98 (0.75-1.27) | 1.00 (0.78-1.27) |
| Asia | Vietnam       | Male      | 0.95 (0.86-1.05) | 0.90 (0.76-1.07) | 0.97 (0.63-1.50) | 0.99 (0.75-1.31) | 1.00 (0.78-1.27) |
| Asia | Vietnam       | Female    | 0.99 (0.65-1.52) | 1.64 (1.04-2.60) | 1.19 (0.51-2.80) | 1.01 (0.55-1.89) | 1.18 (0.67-2.08) |

|               |                       |                  |                  |                  |                  |                  |                  |
|---------------|-----------------------|------------------|------------------|------------------|------------------|------------------|------------------|
| <b>Asia</b>   | <b>Vietnam</b>        | <b>Aged 0-64</b> | 0.92 (0.78-1.09) | 0.96 (0.77-1.19) | 1.01 (0.62-1.67) | 0.98 (0.79-1.21) | 0.98 (0.83-1.16) |
| <b>Europe</b> | <b>Czech Republic</b> | <b>Total</b>     | 0.89 (0.77-1.04) | 0.85 (0.68-1.08) | 0.74 (0.44-1.24) | 0.96 (0.75-1.22) | 1.08 (0.86-1.36) |
| <b>Europe</b> | <b>Czech Republic</b> | <b>Male</b>      | 0.90 (0.79-1.04) | 0.92 (0.77-1.11) | 0.77 (0.51-1.15) | 0.97 (0.74-1.26) | 1.11 (0.88-1.40) |
| <b>Europe</b> | <b>Czech Republic</b> | <b>Female</b>    | 0.89 (0.70-1.13) | 0.63 (0.45-0.87) | 0.69 (0.36-1.35) | 0.92 (0.60-1.42) | 0.97 (0.65-1.44) |
| <b>Europe</b> | <b>Czech Republic</b> | <b>Aged 0-64</b> | 0.90 (0.74-1.08) | 0.95 (0.75-1.20) | 0.84 (0.51-1.39) | 0.96 (0.76-1.21) | 1.12 (0.93-1.34) |
| <b>Europe</b> | <b>Estonia</b>        | <b>Total</b>     | 0.90 (0.77-1.05) | 0.91 (0.71-1.15) | 0.85 (0.50-1.46) | 0.97 (0.75-1.26) | 1.10 (0.87-1.40) |
| <b>Europe</b> | <b>Estonia</b>        | <b>Male</b>      | 0.91 (0.79-1.04) | 0.94 (0.77-1.13) | 0.79 (0.52-1.20) | 0.95 (0.72-1.26) | 1.10 (0.86-1.40) |
| <b>Europe</b> | <b>Estonia</b>        | <b>Female</b>    | 0.87 (0.65-1.17) | 0.58 (0.40-0.85) | 0.85 (0.41-1.77) | 1.04 (0.63-1.71) | 1.05 (0.67-1.66) |
| <b>Europe</b> | <b>Estonia</b>        | <b>Aged 0-64</b> | 0.88 (0.73-1.06) | 0.97 (0.77-1.23) | 0.86 (0.53-1.40) | 0.98 (0.78-1.23) | 1.14 (0.95-1.37) |
| <b>Europe</b> | <b>Finland</b>        | <b>Total</b>     | 0.91 (0.80-1.03) | 0.88 (0.75-1.04) | 0.76 (0.56-1.03) | 0.93 (0.77-1.12) | 1.10 (0.93-1.31) |
| <b>Europe</b> | <b>Finland</b>        | <b>Male</b>      | 0.91 (0.80-1.03) | 0.93 (0.79-1.09) | 0.76 (0.58-1.01) | 0.95 (0.78-1.17) | 1.11 (0.93-1.33) |
| <b>Europe</b> | <b>Finland</b>        | <b>Female</b>    | 0.93 (0.73-1.18) | 0.79 (0.58-1.07) | 0.76 (0.47-1.22) | 0.97 (0.69-1.35) | 1.06 (0.78-1.44) |
| <b>Europe</b> | <b>Finland</b>        | <b>Aged 0-64</b> | 0.92 (0.79-1.07) | 0.90 (0.76-1.08) | 0.76 (0.56-1.03) | 0.91 (0.76-1.10) | 1.09 (0.94-1.27) |
| <b>Europe</b> | <b>Germany</b>        | <b>Total</b>     | 0.92 (0.79-1.07) | 0.90 (0.72-1.12) | 0.89 (0.55-1.42) | 0.94 (0.73-1.20) | 1.05 (0.83-1.32) |
| <b>Europe</b> | <b>Germany</b>        | <b>Male</b>      | 0.92 (0.81-1.06) | 0.97 (0.81-1.17) | 0.90 (0.61-1.33) | 0.92 (0.70-1.21) | 1.05 (0.83-1.34) |
| <b>Europe</b> | <b>Germany</b>        | <b>Female</b>    | 0.89 (0.70-1.13) | 0.63 (0.46-0.87) | 0.71 (0.37-1.37) | 0.94 (0.62-1.43) | 0.98 (0.67-1.45) |
| <b>Europe</b> | <b>Germany</b>        | <b>Aged 0-64</b> | 0.91 (0.76-1.10) | 0.97 (0.77-1.21) | 0.91 (0.59-1.42) | 0.95 (0.76-1.19) | 1.11 (0.93-1.33) |
| <b>Europe</b> | <b>Italy</b>          | <b>Total</b>     | 0.91 (0.78-1.06) | 0.90 (0.71-1.15) | 0.86 (0.50-1.47) | 0.95 (0.73-1.24) | 1.08 (0.85-1.38) |
| <b>Europe</b> | <b>Italy</b>          | <b>Male</b>      | 0.92 (0.80-1.05) | 0.95 (0.79-1.15) | 0.82 (0.54-1.25) | 0.94 (0.71-1.24) | 1.08 (0.85-1.38) |
| <b>Europe</b> | <b>Italy</b>          | <b>Female</b>    | 0.91 (0.72-1.15) | 0.82 (0.59-1.13) | 0.88 (0.44-1.73) | 1.04 (0.67-1.61) | 1.15 (0.77-1.72) |
| <b>Europe</b> | <b>Italy</b>          | <b>Aged 0-64</b> | 0.89 (0.74-1.07) | 0.97 (0.77-1.23) | 0.87 (0.54-1.42) | 0.97 (0.77-1.22) | 1.14 (0.95-1.36) |

|               |                    |                  |                  |                  |                  |                  |                  |
|---------------|--------------------|------------------|------------------|------------------|------------------|------------------|------------------|
| <b>Europe</b> | <b>Romania</b>     | <b>Total</b>     | 0.93 (0.80-1.08) | 0.91 (0.74-1.13) | 0.90 (0.57-1.42) | 0.93 (0.72-1.18) | 1.06 (0.84-1.33) |
| <b>Europe</b> | <b>Romania</b>     | <b>Male</b>      | 0.92 (0.81-1.06) | 0.96 (0.80-1.15) | 0.83 (0.57-1.23) | 0.91 (0.70-1.19) | 1.06 (0.84-1.34) |
| <b>Europe</b> | <b>Romania</b>     | <b>Female</b>    | 0.89 (0.71-1.11) | 0.69 (0.50-0.94) | 0.88 (0.48-1.63) | 1.06 (0.71-1.57) | 1.11 (0.77-1.60) |
| <b>Europe</b> | <b>Romania</b>     | <b>Aged 0-64</b> | 0.92 (0.77-1.11) | 0.93 (0.74-1.15) | 0.84 (0.54-1.29) | 0.92 (0.74-1.15) | 1.09 (0.91-1.30) |
| <b>Europe</b> | <b>Spain</b>       | <b>Total</b>     | 0.88 (0.77-1.01) | 1.05 (0.88-1.25) | 1.23 (0.89-1.69) | 1.13 (0.92-1.38) | 1.21 (1.01-1.47) |
| <b>Europe</b> | <b>Spain</b>       | <b>Male</b>      | 0.91 (0.80-1.03) | 1.01 (0.86-1.19) | 1.02 (0.75-1.38) | 0.99 (0.79-1.25) | 1.12 (0.91-1.37) |
| <b>Europe</b> | <b>Spain</b>       | <b>Female</b>    | 0.91 (0.72-1.15) | 0.91 (0.67-1.23) | 1.45 (0.91-2.31) | 1.40 (1.00-1.94) | 1.50 (1.11-2.04) |
| <b>Europe</b> | <b>Spain</b>       | <b>Aged 0-64</b> | 0.87 (0.73-1.03) | 1.08 (0.89-1.31) | 1.15 (0.83-1.59) | 1.04 (0.85-1.27) | 1.19 (1.01-1.40) |
| <b>Europe</b> | <b>Switzerland</b> | <b>Total</b>     | 0.85 (0.75-0.97) | 0.76 (0.64-0.90) | 0.54 (0.39-0.76) | 0.97 (0.80-1.18) | 1.09 (0.91-1.30) |
| <b>Europe</b> | <b>Switzerland</b> | <b>Male</b>      | 0.90 (0.79-1.02) | 0.86 (0.72-1.01) | 0.61 (0.44-0.84) | 0.96 (0.77-1.20) | 1.12 (0.92-1.36) |
| <b>Europe</b> | <b>Switzerland</b> | <b>Female</b>    | 0.90 (0.71-1.13) | 0.62 (0.46-0.84) | 0.70 (0.44-1.12) | 0.93 (0.67-1.31) | 0.97 (0.72-1.32) |
| <b>Europe</b> | <b>Switzerland</b> | <b>Aged 0-64</b> | 0.86 (0.73-1.01) | 0.85 (0.70-1.03) | 0.62 (0.44-0.88) | 0.99 (0.82-1.21) | 1.10 (0.94-1.29) |
| <b>Europe</b> | <b>UK</b>          | <b>Total</b>     | 0.94 (0.82-1.07) | 0.83 (0.70-0.99) | 0.78 (0.57-1.07) | 0.87 (0.71-1.06) | 0.97 (0.81-1.17) |
| <b>Europe</b> | <b>UK</b>          | <b>Male</b>      | 0.93 (0.81-1.05) | 0.93 (0.79-1.09) | 0.80 (0.60-1.07) | 0.89 (0.71-1.11) | 1.02 (0.84-1.25) |
| <b>Europe</b> | <b>UK</b>          | <b>Female</b>    | 0.89 (0.71-1.11) | 0.64 (0.48-0.86) | 0.62 (0.38-1.01) | 0.85 (0.61-1.20) | 0.92 (0.68-1.26) |
| <b>Europe</b> | <b>UK</b>          | <b>Aged 0-64</b> | 0.94 (0.80-1.10) | 0.92 (0.77-1.10) | 0.83 (0.61-1.13) | 0.91 (0.75-1.10) | 1.08 (0.92-1.26) |

**Table S7.** Risks of suicide during New Year’s Day season (reference days: non-holidays which are not included in New Year’s Day, Christmas, and other national holidays that this study addressed) for 26 countries with the corresponding 95%.

| Region          | Country       | Subgroup  | RR (95% CI)      |                  |                  |                  |                  |
|-----------------|---------------|-----------|------------------|------------------|------------------|------------------|------------------|
|                 |               |           | Day -2           | Day -1           | Day 0            | Day +1           | Day +2           |
| North America   | Canada        | Total     | 0.96 (0.77-1.19) | 0.86 (0.71-1.04) | 1.30 (0.96-1.77) | 1.05 (0.87-1.27) | 1.12 (0.99-1.28) |
| North America   | Canada        | Male      | 0.99 (0.78-1.25) | 0.89 (0.71-1.12) | 1.27 (0.86-1.87) | 1.03 (0.81-1.33) | 1.10 (0.92-1.32) |
| North America   | Canada        | Female    | 0.94 (0.61-1.44) | 0.67 (0.47-0.97) | 1.49 (1.06-2.11) | 0.94 (0.70-1.26) | 1.14 (0.85-1.54) |
| North America   | Canada        | Aged 0-64 | 0.92 (0.73-1.16) | 0.83 (0.65-1.06) | 1.37 (0.98-1.89) | 1.00 (0.81-1.25) | 1.11 (0.95-1.30) |
| North America   | United States | Total     | 0.98 (0.80-1.20) | 0.86 (0.72-1.04) | 1.19 (0.89-1.59) | 1.00 (0.83-1.19) | 1.08 (0.95-1.23) |
| North America   | United States | Male      | 0.98 (0.79-1.23) | 0.89 (0.71-1.11) | 1.17 (0.80-1.70) | 1.05 (0.83-1.32) | 1.07 (0.90-1.28) |
| North America   | United States | Female    | 0.87 (0.59-1.29) | 0.86 (0.64-1.16) | 1.13 (0.81-1.57) | 0.93 (0.72-1.22) | 1.10 (0.84-1.44) |
| North America   | United States | Aged 0-64 | 0.99 (0.80-1.24) | 0.89 (0.70-1.12) | 1.19 (0.87-1.63) | 1.00 (0.81-1.22) | 1.07 (0.92-1.24) |
| Central America | Costa Rica    | Total     | 1.04 (0.75-1.44) | 0.86 (0.62-1.19) | 1.69 (1.11-2.58) | 0.86 (0.62-1.18) | 0.94 (0.72-1.22) |
| Central America | Guatemala     | Total     | 1.05 (0.75-1.48) | 0.89 (0.64-1.25) | 1.83 (1.13-2.97) | 0.86 (0.62-1.19) | 0.96 (0.73-1.25) |
| Central America | Mexico        | Total     | 1.01 (0.74-1.37) | 0.88 (0.65-1.19) | 1.78 (1.24-2.56) | 0.81 (0.60-1.11) | 0.94 (0.73-1.21) |
| Central America | Mexico        | Male      | 0.96 (0.65-1.41) | 0.97 (0.66-1.43) | 1.90 (1.10-3.29) | 0.79 (0.52-1.22) | 0.85 (0.59-1.23) |
| Central America | Mexico        | Female    | 1.04 (0.53-2.04) | 0.82 (0.42-1.57) | 1.20 (0.66-2.18) | 0.49 (0.22-1.11) | 1.41 (0.84-2.37) |
| Central America | Mexico        | Aged 0-64 | 0.97 (0.67-1.42) | 0.91 (0.61-1.34) | 1.82 (1.14-2.90) | 0.69 (0.46-1.02) | 0.95 (0.69-1.29) |
| South America   | Brazil        | Total     | 0.66 (0.47-0.93) | 1.02 (0.78-1.34) | 1.27 (0.90-1.80) | 1.35 (1.04-1.75) | 1.11 (0.89-1.39) |
| South America   | Brazil        | Male      | 0.70 (0.48-1.02) | 1.17 (0.85-1.61) | 1.30 (0.85-2.00) | 1.43 (1.03-1.98) | 0.98 (0.74-1.31) |
| South America   | Brazil        | Female    | 0.60 (0.30-1.22) | 0.80 (0.47-1.37) | 1.04 (0.62-1.74) | 1.20 (0.79-1.81) | 1.52 (1.03-2.26) |

|                             |                     |                  |                  |                  |                  |                  |                  |
|-----------------------------|---------------------|------------------|------------------|------------------|------------------|------------------|------------------|
| <b>South America</b>        | <b>Brazil</b>       | <b>Aged 0-64</b> | 0.64 (0.44-0.92) | 1.05 (0.76-1.44) | 1.28 (0.88-1.86) | 1.33 (1.00-1.78) | 1.15 (0.90-1.46) |
| <b>South America</b>        | <b>Chile</b>        | <b>Total</b>     | 0.78 (0.55-1.11) | 1.27 (0.96-1.68) | 1.93 (1.31-2.85) | 1.43 (1.09-1.88) | 1.25 (0.99-1.56) |
| <b>South America</b>        | <b>Chile</b>        | <b>Male</b>      | 0.80 (0.54-1.17) | 1.28 (0.91-1.79) | 2.08 (1.29-3.38) | 1.52 (1.06-2.17) | 1.17 (0.87-1.57) |
| <b>South America</b>        | <b>Chile</b>        | <b>Female</b>    | 0.67 (0.32-1.37) | 0.72 (0.41-1.24) | 1.11 (0.64-1.92) | 1.17 (0.75-1.82) | 1.66 (1.09-2.53) |
| <b>South America</b>        | <b>Chile</b>        | <b>Aged 0-64</b> | 0.77 (0.53-1.13) | 1.36 (0.97-1.91) | 1.93 (1.26-2.95) | 1.43 (1.05-1.95) | 1.31 (1.02-1.68) |
| <b>South America</b>        | <b>Ecuador</b>      | <b>Total</b>     | 0.68 (0.47-0.98) | 1.10 (0.82-1.48) | 1.48 (0.96-2.29) | 1.34 (1.02-1.77) | 1.15 (0.91-1.45) |
| <b>South America</b>        | <b>Ecuador</b>      | <b>Male</b>      | 0.70 (0.47-1.04) | 1.12 (0.78-1.59) | 1.50 (0.86-2.59) | 1.33 (0.92-1.94) | 1.03 (0.75-1.40) |
| <b>South America</b>        | <b>Ecuador</b>      | <b>Female</b>    | 0.64 (0.32-1.31) | 0.77 (0.45-1.31) | 1.04 (0.61-1.76) | 1.18 (0.78-1.80) | 1.60 (1.07-2.39) |
| <b>South America</b>        | <b>Ecuador</b>      | <b>Aged 0-64</b> | 0.65 (0.44-0.97) | 1.12 (0.78-1.61) | 1.44 (0.90-2.31) | 1.32 (0.96-1.81) | 1.18 (0.91-1.53) |
| <b>South America</b>        | <b>Paraguay</b>     | <b>Total</b>     | 0.72 (0.50-1.04) | 1.20 (0.89-1.62) | 1.77 (1.13-2.75) | 1.38 (1.04-1.82) | 1.21 (0.96-1.53) |
| <b>Africa &amp; Oceania</b> | <b>Australia</b>    | <b>Total</b>     | 1.32 (0.86-2.03) | 1.09 (0.71-1.66) | 1.48 (0.84-2.59) | 1.11 (0.73-1.69) | 1.40 (0.98-2.01) |
| <b>Africa &amp; Oceania</b> | <b>Australia</b>    | <b>Male</b>      | 1.20 (0.73-1.97) | 1.08 (0.65-1.77) | 1.43 (0.69-2.96) | 1.07 (0.63-1.81) | 1.27 (0.80-2.00) |
| <b>Africa &amp; Oceania</b> | <b>Australia</b>    | <b>Female</b>    | 1.63 (0.75-3.56) | 1.90 (0.91-3.96) | 1.59 (0.77-3.27) | 1.21 (0.56-2.63) | 1.89 (0.97-3.67) |
| <b>Africa &amp; Oceania</b> | <b>Australia</b>    | <b>Aged 0-64</b> | 1.38 (0.87-2.19) | 1.14 (0.71-1.84) | 1.66 (0.92-2.99) | 1.07 (0.67-1.69) | 1.51 (1.03-2.21) |
| <b>Africa &amp; Oceania</b> | <b>South Africa</b> | <b>Total</b>     | 1.35 (0.89-2.05) | 1.16 (0.77-1.74) | 1.69 (1.02-2.81) | 1.11 (0.74-1.68) | 1.45 (1.02-2.06) |
| <b>Africa &amp; Oceania</b> | <b>South Africa</b> | <b>Male</b>      | 1.24 (0.76-2.00) | 1.07 (0.66-1.74) | 1.75 (0.93-3.32) | 1.04 (0.63-1.73) | 1.36 (0.88-2.10) |
| <b>Africa &amp; Oceania</b> | <b>South Africa</b> | <b>Female</b>    | 1.60 (0.74-3.44) | 1.76 (0.85-3.61) | 1.79 (0.88-3.64) | 1.18 (0.55-2.56) | 1.91 (0.99-3.70) |
| <b>Africa &amp; Oceania</b> | <b>South Africa</b> | <b>Aged 0-64</b> | 1.35 (0.87-2.10) | 1.18 (0.75-1.85) | 1.81 (1.07-3.07) | 1.03 (0.65-1.62) | 1.52 (1.05-2.21) |
| <b>Asia</b>                 | <b>China</b>        | <b>Total</b>     | 0.90 (0.71-1.14) | 0.99 (0.81-1.21) | 1.29 (0.88-1.89) | 0.94 (0.77-1.14) | 1.05 (0.94-1.18) |
| <b>Asia</b>                 | <b>China</b>        | <b>Male</b>      | 0.94 (0.73-1.21) | 0.96 (0.75-1.24) | 1.65 (1.01-2.68) | 0.88 (0.66-1.19) | 1.15 (0.95-1.39) |

|      |               |           |                  |                  |                  |                  |                  |
|------|---------------|-----------|------------------|------------------|------------------|------------------|------------------|
| Asia | China         | Female    | 0.87 (0.61-1.26) | 0.84 (0.69-1.01) | 0.87 (0.65-1.16) | 1.00 (0.87-1.15) | 1.06 (0.87-1.28) |
| Asia | China         | Aged 0-64 | 0.99 (0.76-1.29) | 1.06 (0.81-1.40) | 1.48 (0.98-2.23) | 0.95 (0.75-1.20) | 1.07 (0.92-1.25) |
| Asia | Japan         | Total     | 0.77 (0.67-0.89) | 0.84 (0.75-0.95) | 0.93 (0.75-1.14) | 0.85 (0.75-0.96) | 0.95 (0.88-1.02) |
| Asia | Japan         | Male      | 0.78 (0.67-0.92) | 0.85 (0.73-0.99) | 0.91 (0.69-1.19) | 0.80 (0.68-0.95) | 0.92 (0.82-1.03) |
| Asia | Japan         | Female    | 0.75 (0.61-0.94) | 0.83 (0.73-0.94) | 0.97 (0.81-1.16) | 0.96 (0.87-1.05) | 1.01 (0.90-1.14) |
| Asia | Japan         | Aged 0-64 | 0.80 (0.69-0.94) | 0.88 (0.75-1.02) | 0.96 (0.77-1.20) | 0.80 (0.70-0.93) | 0.91 (0.83-1.00) |
| Asia | Korea (South) | Total     | 0.99 (0.84-1.16) | 0.92 (0.81-1.05) | 1.00 (0.79-1.26) | 1.02 (0.89-1.18) | 1.01 (0.93-1.09) |
| Asia | Korea (South) | Male      | 0.99 (0.83-1.19) | 1.03 (0.87-1.22) | 1.00 (0.75-1.34) | 1.04 (0.87-1.26) | 0.96 (0.85-1.08) |
| Asia | Korea (South) | Female    | 0.96 (0.73-1.27) | 0.74 (0.63-0.87) | 0.95 (0.76-1.19) | 1.01 (0.90-1.13) | 1.11 (0.96-1.29) |
| Asia | Korea (South) | Aged 0-64 | 1.05 (0.88-1.24) | 0.98 (0.82-1.17) | 1.07 (0.84-1.37) | 1.03 (0.88-1.21) | 1.02 (0.92-1.12) |
| Asia | Philippines   | Total     | 0.85 (0.67-1.08) | 0.89 (0.73-1.09) | 1.01 (0.69-1.49) | 0.91 (0.75-1.11) | 0.99 (0.88-1.11) |
| Asia | Philippines   | Male      | 0.87 (0.68-1.12) | 0.91 (0.71-1.17) | 1.11 (0.67-1.85) | 0.86 (0.65-1.15) | 0.99 (0.81-1.21) |
| Asia | Philippines   | Female    | 0.82 (0.47-1.45) | 1.05 (0.66-1.66) | 0.67 (0.41-1.12) | 1.04 (0.69-1.55) | 0.98 (0.65-1.47) |
| Asia | Philippines   | Aged 0-64 | 0.89 (0.69-1.15) | 0.91 (0.70-1.19) | 1.07 (0.71-1.62) | 0.90 (0.72-1.13) | 0.97 (0.84-1.13) |
| Asia | Taiwan        | Total     | 0.85 (0.70-1.04) | 0.91 (0.78-1.07) | 1.07 (0.81-1.42) | 0.91 (0.76-1.08) | 1.00 (0.91-1.10) |
| Asia | Taiwan        | Male      | 0.85 (0.68-1.07) | 0.82 (0.66-1.02) | 1.33 (0.93-1.88) | 0.75 (0.59-0.97) | 1.04 (0.90-1.20) |
| Asia | Taiwan        | Female    | 0.89 (0.58-1.35) | 0.97 (0.70-1.33) | 0.70 (0.48-1.02) | 1.02 (0.77-1.34) | 1.05 (0.78-1.40) |
| Asia | Taiwan        | Aged 0-64 | 0.88 (0.71-1.09) | 0.92 (0.74-1.14) | 1.15 (0.85-1.56) | 0.90 (0.74-1.11) | 0.99 (0.88-1.12) |
| Asia | Vietnam       | Total     | 0.92 (0.73-1.17) | 0.95 (0.77-1.17) | 1.16 (0.78-1.72) | 0.97 (0.80-1.17) | 1.03 (0.92-1.16) |
| Asia | Vietnam       | Male      | 0.96 (0.74-1.23) | 1.03 (0.80-1.31) | 1.31 (0.78-2.18) | 0.98 (0.74-1.31) | 1.06 (0.87-1.30) |
| Asia | Vietnam       | Female    | 0.84 (0.47-1.49) | 1.06 (0.66-1.68) | 0.65 (0.39-1.09) | 1.03 (0.69-1.56) | 0.99 (0.65-1.51) |

|               |                       |                  |                  |                  |                  |                  |                  |
|---------------|-----------------------|------------------|------------------|------------------|------------------|------------------|------------------|
| <b>Asia</b>   | <b>Vietnam</b>        | <b>Aged 0-64</b> | 1.02 (0.78-1.32) | 1.03 (0.78-1.35) | 1.29 (0.84-1.97) | 0.99 (0.79-1.25) | 1.05 (0.90-1.23) |
| <b>Europe</b> | <b>Czech Republic</b> | <b>Total</b>     | 0.87 (0.70-1.10) | 0.96 (0.79-1.16) | 1.24 (0.88-1.74) | 1.08 (0.90-1.31) | 1.10 (0.97-1.26) |
| <b>Europe</b> | <b>Czech Republic</b> | <b>Male</b>      | 0.86 (0.67-1.10) | 0.99 (0.78-1.26) | 1.32 (0.87-2.00) | 1.03 (0.79-1.35) | 1.16 (0.97-1.40) |
| <b>Europe</b> | <b>Czech Republic</b> | <b>Female</b>    | 0.96 (0.66-1.41) | 0.86 (0.66-1.11) | 1.22 (0.89-1.68) | 1.15 (0.93-1.44) | 1.05 (0.82-1.36) |
| <b>Europe</b> | <b>Czech Republic</b> | <b>Aged 0-64</b> | 0.85 (0.64-1.12) | 0.97 (0.73-1.29) | 1.23 (0.79-1.90) | 1.07 (0.84-1.36) | 1.16 (0.98-1.39) |
| <b>Europe</b> | <b>Estonia</b>        | <b>Total</b>     | 0.84 (0.66-1.07) | 0.95 (0.77-1.17) | 1.24 (0.85-1.80) | 1.06 (0.87-1.29) | 1.10 (0.96-1.26) |
| <b>Europe</b> | <b>Estonia</b>        | <b>Male</b>      | 0.84 (0.65-1.09) | 0.96 (0.75-1.24) | 1.25 (0.77-2.03) | 1.00 (0.75-1.33) | 1.14 (0.92-1.40) |
| <b>Europe</b> | <b>Estonia</b>        | <b>Female</b>    | 0.94 (0.61-1.45) | 0.80 (0.58-1.10) | 1.38 (0.96-1.99) | 1.14 (0.87-1.51) | 1.05 (0.78-1.41) |
| <b>Europe</b> | <b>Estonia</b>        | <b>Aged 0-64</b> | 0.86 (0.66-1.13) | 1.00 (0.76-1.32) | 1.35 (0.90-2.03) | 1.08 (0.85-1.36) | 1.20 (1.01-1.42) |
| <b>Europe</b> | <b>Finland</b>        | <b>Total</b>     | 0.86 (0.71-1.03) | 1.03 (0.89-1.19) | 1.50 (1.21-1.86) | 1.06 (0.90-1.24) | 1.15 (1.04-1.28) |
| <b>Europe</b> | <b>Finland</b>        | <b>Male</b>      | 0.84 (0.68-1.03) | 1.04 (0.87-1.25) | 1.53 (1.18-1.99) | 1.05 (0.86-1.27) | 1.24 (1.08-1.43) |
| <b>Europe</b> | <b>Finland</b>        | <b>Female</b>    | 0.84 (0.59-1.20) | 0.95 (0.73-1.24) | 1.20 (0.90-1.61) | 1.21 (0.97-1.50) | 0.92 (0.71-1.19) |
| <b>Europe</b> | <b>Finland</b>        | <b>Aged 0-64</b> | 0.89 (0.73-1.08) | 1.08 (0.89-1.31) | 1.51 (1.19-1.91) | 1.08 (0.90-1.29) | 1.23 (1.08-1.39) |
| <b>Europe</b> | <b>Germany</b>        | <b>Total</b>     | 0.85 (0.68-1.07) | 0.94 (0.77-1.14) | 1.21 (0.85-1.70) | 1.08 (0.89-1.31) | 1.10 (0.96-1.25) |
| <b>Europe</b> | <b>Germany</b>        | <b>Male</b>      | 0.86 (0.67-1.10) | 0.98 (0.77-1.25) | 1.25 (0.80-1.93) | 1.03 (0.78-1.35) | 1.13 (0.94-1.37) |
| <b>Europe</b> | <b>Germany</b>        | <b>Female</b>    | 0.98 (0.67-1.43) | 0.87 (0.68-1.13) | 1.19 (0.87-1.62) | 1.15 (0.93-1.43) | 1.06 (0.83-1.36) |
| <b>Europe</b> | <b>Germany</b>        | <b>Aged 0-64</b> | 0.82 (0.63-1.06) | 0.92 (0.70-1.20) | 1.09 (0.73-1.63) | 1.05 (0.84-1.33) | 1.12 (0.95-1.33) |
| <b>Europe</b> | <b>Italy</b>          | <b>Total</b>     | 0.83 (0.65-1.05) | 0.91 (0.73-1.12) | 1.12 (0.76-1.65) | 1.05 (0.86-1.28) | 1.07 (0.93-1.23) |
| <b>Europe</b> | <b>Italy</b>          | <b>Male</b>      | 0.84 (0.64-1.08) | 0.95 (0.74-1.23) | 1.20 (0.73-1.96) | 0.99 (0.75-1.33) | 1.12 (0.91-1.38) |
| <b>Europe</b> | <b>Italy</b>          | <b>Female</b>    | 0.93 (0.62-1.38) | 0.98 (0.75-1.28) | 1.05 (0.76-1.46) | 1.18 (0.95-1.47) | 1.00 (0.77-1.31) |
| <b>Europe</b> | <b>Italy</b>          | <b>Aged 0-64</b> | 0.84 (0.64-1.10) | 0.95 (0.72-1.26) | 1.19 (0.78-1.80) | 1.06 (0.84-1.35) | 1.15 (0.97-1.37) |

|               |                    |                  |                  |                  |                  |                  |                  |
|---------------|--------------------|------------------|------------------|------------------|------------------|------------------|------------------|
| <b>Europe</b> | <b>Romania</b>     | <b>Total</b>     | 0.85 (0.67-1.06) | 0.91 (0.75-1.11) | 1.14 (0.81-1.61) | 1.09 (0.90-1.31) | 1.09 (0.95-1.24) |
| <b>Europe</b> | <b>Romania</b>     | <b>Male</b>      | 0.86 (0.67-1.10) | 1.02 (0.81-1.30) | 1.17 (0.76-1.80) | 1.09 (0.83-1.42) | 1.12 (0.92-1.35) |
| <b>Europe</b> | <b>Romania</b>     | <b>Female</b>    | 0.95 (0.66-1.38) | 0.89 (0.69-1.13) | 1.19 (0.88-1.61) | 1.16 (0.95-1.42) | 1.04 (0.81-1.32) |
| <b>Europe</b> | <b>Romania</b>     | <b>Aged 0-64</b> | 0.83 (0.64-1.08) | 0.92 (0.71-1.19) | 1.16 (0.80-1.69) | 1.09 (0.87-1.36) | 1.15 (0.98-1.36) |
| <b>Europe</b> | <b>Spain</b>       | <b>Total</b>     | 0.81 (0.66-1.00) | 0.89 (0.75-1.05) | 1.10 (0.84-1.43) | 1.07 (0.90-1.27) | 1.07 (0.96-1.20) |
| <b>Europe</b> | <b>Spain</b>       | <b>Male</b>      | 0.84 (0.68-1.06) | 0.95 (0.77-1.18) | 1.27 (0.92-1.75) | 0.99 (0.79-1.25) | 1.14 (0.98-1.33) |
| <b>Europe</b> | <b>Spain</b>       | <b>Female</b>    | 0.84 (0.57-1.23) | 1.03 (0.78-1.34) | 1.07 (0.78-1.46) | 1.15 (0.92-1.44) | 0.97 (0.74-1.26) |
| <b>Europe</b> | <b>Spain</b>       | <b>Aged 0-64</b> | 0.87 (0.69-1.08) | 0.96 (0.76-1.19) | 1.23 (0.92-1.66) | 1.12 (0.91-1.37) | 1.18 (1.03-1.36) |
| <b>Europe</b> | <b>Switzerland</b> | <b>Total</b>     | 0.82 (0.68-1.00) | 0.86 (0.73-1.00) | 0.98 (0.76-1.25) | 1.06 (0.90-1.26) | 1.04 (0.93-1.16) |
| <b>Europe</b> | <b>Switzerland</b> | <b>Male</b>      | 0.79 (0.64-0.98) | 0.91 (0.74-1.11) | 0.97 (0.71-1.33) | 0.96 (0.78-1.20) | 1.03 (0.89-1.20) |
| <b>Europe</b> | <b>Switzerland</b> | <b>Female</b>    | 1.05 (0.75-1.45) | 0.86 (0.67-1.10) | 1.15 (0.87-1.52) | 1.17 (0.94-1.44) | 1.10 (0.87-1.39) |
| <b>Europe</b> | <b>Switzerland</b> | <b>Aged 0-64</b> | 0.83 (0.67-1.03) | 0.90 (0.72-1.11) | 1.12 (0.85-1.48) | 1.10 (0.91-1.34) | 1.15 (1.00-1.32) |
| <b>Europe</b> | <b>UK</b>          | <b>Total</b>     | 0.88 (0.74-1.05) | 0.97 (0.84-1.12) | 1.17 (0.95-1.45) | 1.01 (0.87-1.18) | 1.07 (0.96-1.19) |
| <b>Europe</b> | <b>UK</b>          | <b>Male</b>      | 0.90 (0.74-1.09) | 0.93 (0.78-1.11) | 1.14 (0.88-1.48) | 1.01 (0.83-1.22) | 1.08 (0.94-1.24) |
| <b>Europe</b> | <b>UK</b>          | <b>Female</b>    | 0.84 (0.61-1.16) | 0.92 (0.72-1.16) | 1.24 (0.95-1.62) | 1.12 (0.92-1.37) | 1.00 (0.80-1.25) |
| <b>Europe</b> | <b>UK</b>          | <b>Aged 0-64</b> | 0.86 (0.71-1.04) | 1.03 (0.85-1.24) | 1.20 (0.95-1.53) | 1.02 (0.85-1.21) | 1.14 (1.00-1.29) |



**Table S8.** Risks of suicide during other national holidays (except Christmas and New Year’s Day) and neighboring days (reference days: non-holidays which are not included in New Year’s Day, Christmas, and other national holidays that this study addressed) for 26 countries with the corresponding 95% confidence intervals (vertical lines)

| Region          | Country       | Subgroup  | RR (95% CI)      |                  |                  |                  |                  |
|-----------------|---------------|-----------|------------------|------------------|------------------|------------------|------------------|
|                 |               |           | Day -2           | Day -1           | Day 0            | Day +1           | Day +2           |
| North America   | Canada        | Total     | 0.97 (0.93-1.01) | 0.95 (0.91-0.99) | 0.93 (0.81-1.08) | 1.01 (0.95-1.08) | 1.05 (0.98-1.12) |
| North America   | Canada        | Male      | 0.97 (0.92-1.02) | 0.98 (0.93-1.03) | 0.93 (0.78-1.12) | 1.05 (0.96-1.14) | 1.05 (1.00-1.12) |
| North America   | Canada        | Female    | 0.99 (0.89-1.10) | 0.87 (0.77-0.98) | 0.86 (0.78-0.96) | 0.92 (0.83-1.02) | 0.99 (0.90-1.10) |
| North America   | Canada        | Aged 0-64 | 0.99 (0.94-1.04) | 0.97 (0.92-1.01) | 0.93 (0.81-1.08) | 1.00 (0.92-1.09) | 1.04 (0.98-1.10) |
| North America   | United States | Total     | 0.97 (0.93-1.01) | 0.96 (0.92-1.00) | 0.92 (0.80-1.05) | 1.03 (0.97-1.10) | 1.04 (0.97-1.10) |
| North America   | United States | Male      | 0.97 (0.92-1.02) | 0.98 (0.93-1.03) | 0.93 (0.78-1.11) | 1.04 (0.96-1.13) | 1.05 (1.00-1.12) |
| North America   | United States | Female    | 0.95 (0.86-1.05) | 0.88 (0.79-0.98) | 0.90 (0.82-0.99) | 0.99 (0.91-1.08) | 0.99 (0.90-1.09) |
| North America   | United States | Aged 0-64 | 0.99 (0.94-1.04) | 0.96 (0.92-1.01) | 0.91 (0.80-1.04) | 1.02 (0.94-1.11) | 1.03 (0.98-1.09) |
| Central America | Costa Rica    | Total     | 0.99 (0.90-1.08) | 0.96 (0.88-1.05) | 0.96 (0.79-1.17) | 1.02 (0.92-1.14) | 1.01 (0.91-1.13) |
| Central America | Guatemala     | Total     | 0.99 (0.90-1.09) | 0.96 (0.88-1.05) | 1.03 (0.82-1.30) | 1.02 (0.92-1.14) | 1.04 (0.92-1.17) |
| Central America | Mexico        | Total     | 1.00 (0.91-1.09) | 0.97 (0.88-1.05) | 1.09 (0.92-1.30) | 1.02 (0.92-1.14) | 1.06 (0.96-1.18) |
| Central America | Mexico        | Male      | 0.99 (0.88-1.12) | 0.91 (0.81-1.02) | 1.11 (0.84-1.45) | 1.02 (0.88-1.19) | 1.07 (0.95-1.21) |
| Central America | Mexico        | Female    | 1.04 (0.82-1.31) | 0.98 (0.77-1.25) | 1.04 (0.83-1.31) | 1.05 (0.84-1.33) | 1.32 (1.06-1.63) |
| Central America | Mexico        | Aged 0-64 | 1.01 (0.90-1.13) | 0.94 (0.85-1.05) | 1.08 (0.88-1.34) | 1.01 (0.88-1.17) | 1.14 (1.02-1.28) |
| South America   | Brazil        | Total     | 0.97 (0.91-1.03) | 0.94 (0.88-1.00) | 0.98 (0.86-1.13) | 1.08 (1.00-1.17) | 1.02 (0.94-1.10) |
| South America   | Brazil        | Male      | 0.97 (0.91-1.05) | 0.94 (0.88-1.01) | 0.95 (0.79-1.14) | 1.11 (1.00-1.22) | 1.00 (0.93-1.09) |
| South America   | Brazil        | Female    | 0.98 (0.86-1.11) | 0.92 (0.79-1.06) | 1.11 (0.98-1.26) | 1.02 (0.90-1.16) | 1.10 (0.97-1.25) |

|                             |                     |                  |                  |                  |                  |                  |                  |
|-----------------------------|---------------------|------------------|------------------|------------------|------------------|------------------|------------------|
| <b>South America</b>        | <b>Brazil</b>       | <b>Aged 0-64</b> | 0.99 (0.93-1.06) | 0.93 (0.87-1.00) | 1.00 (0.87-1.15) | 1.09 (0.99-1.20) | 1.01 (0.94-1.09) |
| <b>South America</b>        | <b>Chile</b>        | <b>Total</b>     | 0.99 (0.93-1.05) | 0.95 (0.89-1.01) | 1.14 (0.97-1.35) | 1.11 (1.02-1.21) | 1.07 (0.98-1.16) |
| <b>South America</b>        | <b>Chile</b>        | <b>Male</b>      | 1.00 (0.93-1.07) | 0.93 (0.86-1.00) | 1.12 (0.91-1.38) | 1.18 (1.06-1.31) | 1.03 (0.95-1.12) |
| <b>South America</b>        | <b>Chile</b>        | <b>Female</b>    | 1.01 (0.88-1.15) | 0.91 (0.78-1.07) | 1.08 (0.94-1.24) | 0.97 (0.85-1.11) | 1.10 (0.96-1.26) |
| <b>South America</b>        | <b>Chile</b>        | <b>Aged 0-64</b> | 1.02 (0.95-1.09) | 0.94 (0.88-1.01) | 1.12 (0.95-1.32) | 1.13 (1.02-1.26) | 1.04 (0.97-1.13) |
| <b>South America</b>        | <b>Ecuador</b>      | <b>Total</b>     | 0.98 (0.92-1.04) | 0.94 (0.88-1.01) | 1.12 (0.92-1.36) | 1.10 (1.01-1.20) | 1.07 (0.97-1.17) |
| <b>South America</b>        | <b>Ecuador</b>      | <b>Male</b>      | 0.98 (0.91-1.06) | 0.94 (0.87-1.01) | 1.01 (0.78-1.29) | 1.13 (1.01-1.26) | 1.01 (0.93-1.10) |
| <b>South America</b>        | <b>Ecuador</b>      | <b>Female</b>    | 0.99 (0.87-1.12) | 0.91 (0.78-1.06) | 1.10 (0.97-1.25) | 1.00 (0.89-1.14) | 1.10 (0.97-1.25) |
| <b>South America</b>        | <b>Ecuador</b>      | <b>Aged 0-64</b> | 1.01 (0.94-1.09) | 0.94 (0.88-1.01) | 1.07 (0.88-1.29) | 1.12 (1.01-1.25) | 1.03 (0.95-1.12) |
| <b>South America</b>        | <b>Paraguay</b>     | <b>Total</b>     | 0.98 (0.92-1.05) | 0.94 (0.88-1.01) | 1.15 (0.93-1.41) | 1.10 (1.01-1.20) | 1.08 (0.98-1.18) |
| <b>Africa &amp; Oceania</b> | <b>Australia</b>    | <b>Total</b>     | 0.99 (0.85-1.16) | 0.88 (0.75-1.02) | 1.09 (0.84-1.42) | 0.94 (0.79-1.11) | 1.21 (1.04-1.41) |
| <b>Africa &amp; Oceania</b> | <b>Australia</b>    | <b>Male</b>      | 0.88 (0.73-1.06) | 0.81 (0.67-0.98) | 1.03 (0.74-1.44) | 0.92 (0.75-1.12) | 1.27 (1.08-1.49) |
| <b>Africa &amp; Oceania</b> | <b>Australia</b>    | <b>Female</b>    | 1.36 (1.03-1.80) | 1.07 (0.79-1.46) | 1.04 (0.75-1.44) | 1.02 (0.75-1.40) | 1.04 (0.77-1.40) |
| <b>Africa &amp; Oceania</b> | <b>Australia</b>    | <b>Aged 0-64</b> | 0.98 (0.84-1.16) | 0.82 (0.69-0.97) | 1.10 (0.85-1.42) | 0.96 (0.79-1.16) | 1.21 (1.04-1.40) |
| <b>Africa &amp; Oceania</b> | <b>South Africa</b> | <b>Total</b>     | 1.00 (0.86-1.16) | 0.88 (0.75-1.03) | 1.10 (0.87-1.40) | 0.94 (0.80-1.12) | 1.22 (1.05-1.41) |
| <b>Africa &amp; Oceania</b> | <b>South Africa</b> | <b>Male</b>      | 0.89 (0.75-1.07) | 0.81 (0.67-0.97) | 1.14 (0.85-1.52) | 0.93 (0.77-1.14) | 1.29 (1.11-1.51) |
| <b>Africa &amp; Oceania</b> | <b>South Africa</b> | <b>Female</b>    | 1.40 (1.06-1.84) | 1.07 (0.79-1.46) | 1.02 (0.74-1.40) | 0.99 (0.72-1.35) | 1.03 (0.77-1.39) |
| <b>Africa &amp; Oceania</b> | <b>South Africa</b> | <b>Aged 0-64</b> | 0.99 (0.84-1.16) | 0.82 (0.69-0.97) | 1.10 (0.87-1.39) | 0.96 (0.80-1.16) | 1.21 (1.04-1.40) |
| <b>Asia</b>                 | <b>China</b>        | <b>Total</b>     | 0.97 (0.95-0.99) | 0.94 (0.92-0.95) | 0.85 (0.72-0.99) | 1.02 (0.96-1.09) | 1.00 (0.94-1.06) |
| <b>Asia</b>                 | <b>China</b>        | <b>Male</b>      | 0.97 (0.93-1.00) | 0.94 (0.92-0.96) | 0.84 (0.69-1.04) | 1.01 (0.93-1.10) | 1.01 (0.97-1.06) |

|      |               |           |                  |                  |                  |                  |                  |
|------|---------------|-----------|------------------|------------------|------------------|------------------|------------------|
| Asia | China         | Female    | 0.96 (0.91-1.02) | 0.94 (0.87-1.01) | 0.94 (0.90-0.99) | 1.07 (1.04-1.10) | 1.02 (0.97-1.07) |
| Asia | China         | Aged 0-64 | 0.97 (0.93-1.00) | 0.94 (0.92-0.96) | 0.85 (0.72-0.99) | 1.01 (0.93-1.10) | 1.00 (0.95-1.04) |
| Asia | Japan         | Total     | 0.98 (0.96-0.99) | 0.94 (0.93-0.95) | 0.87 (0.80-0.95) | 1.06 (1.02-1.10) | 1.00 (0.97-1.04) |
| Asia | Japan         | Male      | 0.97 (0.95-0.99) | 0.93 (0.91-0.95) | 0.85 (0.75-0.95) | 1.06 (1.01-1.11) | 1.00 (0.97-1.03) |
| Asia | Japan         | Female    | 1.00 (0.97-1.03) | 0.97 (0.92-1.01) | 0.92 (0.89-0.94) | 1.05 (1.03-1.07) | 1.00 (0.97-1.03) |
| Asia | Japan         | Aged 0-64 | 0.97 (0.95-0.99) | 0.94 (0.93-0.96) | 0.85 (0.78-0.92) | 1.05 (1.00-1.11) | 1.00 (0.97-1.03) |
| Asia | Korea (South) | Total     | 0.98 (0.96-0.99) | 0.93 (0.92-0.95) | 0.92 (0.84-1.01) | 1.01 (0.97-1.06) | 1.03 (1.00-1.07) |
| Asia | Korea (South) | Male      | 0.98 (0.96-1.00) | 0.94 (0.92-0.96) | 0.92 (0.82-1.04) | 1.00 (0.94-1.06) | 1.03 (1.00-1.07) |
| Asia | Korea (South) | Female    | 0.97 (0.93-1.01) | 0.92 (0.86-0.97) | 0.94 (0.90-0.97) | 1.03 (1.00-1.05) | 1.03 (0.99-1.07) |
| Asia | Korea (South) | Aged 0-64 | 0.98 (0.96-1.00) | 0.95 (0.94-0.97) | 0.92 (0.84-1.01) | 1.00 (0.94-1.05) | 1.02 (0.99-1.05) |
| Asia | Philippines   | Total     | 0.98 (0.96-1.00) | 0.94 (0.92-0.96) | 0.97 (0.83-1.13) | 1.04 (0.97-1.10) | 1.05 (0.99-1.11) |
| Asia | Philippines   | Male      | 0.99 (0.96-1.03) | 0.93 (0.91-0.95) | 1.03 (0.85-1.26) | 1.03 (0.95-1.12) | 1.05 (1.01-1.10) |
| Asia | Philippines   | Female    | 0.91 (0.80-1.03) | 0.95 (0.82-1.10) | 0.99 (0.87-1.13) | 1.17 (1.04-1.32) | 1.02 (0.91-1.15) |
| Asia | Philippines   | Aged 0-64 | 0.99 (0.96-1.03) | 0.96 (0.94-0.98) | 0.96 (0.83-1.12) | 1.03 (0.95-1.12) | 1.03 (0.99-1.08) |
| Asia | Taiwan        | Total     | 0.98 (0.96-0.99) | 0.94 (0.92-0.95) | 0.93 (0.83-1.03) | 1.03 (0.97-1.08) | 1.03 (0.99-1.08) |
| Asia | Taiwan        | Male      | 0.97 (0.95-1.00) | 0.94 (0.92-0.96) | 0.90 (0.78-1.03) | 1.01 (0.94-1.08) | 1.03 (0.99-1.06) |
| Asia | Taiwan        | Female    | 0.93 (0.85-1.01) | 0.94 (0.84-1.04) | 0.98 (0.89-1.07) | 1.13 (1.04-1.22) | 1.03 (0.94-1.12) |
| Asia | Taiwan        | Aged 0-64 | 0.98 (0.96-1.01) | 0.95 (0.93-0.97) | 0.92 (0.83-1.02) | 1.03 (0.96-1.10) | 1.02 (0.99-1.05) |
| Asia | Vietnam       | Total     | 0.98 (0.96-1.00) | 0.94 (0.92-0.96) | 0.93 (0.77-1.12) | 1.04 (0.97-1.10) | 1.03 (0.96-1.10) |
| Asia | Vietnam       | Male      | 0.98 (0.95-1.02) | 0.93 (0.91-0.96) | 0.96 (0.76-1.22) | 1.03 (0.95-1.12) | 1.04 (0.98-1.09) |
| Asia | Vietnam       | Female    | 0.91 (0.80-1.03) | 0.95 (0.82-1.10) | 0.99 (0.87-1.13) | 1.17 (1.04-1.32) | 1.02 (0.90-1.15) |

|               |                       |                  |                  |                  |                  |                  |                  |
|---------------|-----------------------|------------------|------------------|------------------|------------------|------------------|------------------|
| <b>Asia</b>   | <b>Vietnam</b>        | <b>Aged 0-64</b> | 0.99 (0.95-1.03) | 0.95 (0.93-0.97) | 0.93 (0.79-1.11) | 1.04 (0.95-1.13) | 1.03 (0.98-1.08) |
| <b>Europe</b> | <b>Czech Republic</b> | <b>Total</b>     | 0.94 (0.90-0.97) | 0.99 (0.96-1.02) | 0.86 (0.74-1.00) | 1.04 (0.98-1.11) | 1.01 (0.94-1.07) |
| <b>Europe</b> | <b>Czech Republic</b> | <b>Male</b>      | 0.91 (0.87-0.96) | 1.00 (0.96-1.04) | 0.79 (0.65-0.97) | 1.03 (0.94-1.11) | 1.03 (0.97-1.08) |
| <b>Europe</b> | <b>Czech Republic</b> | <b>Female</b>    | 0.98 (0.91-1.06) | 0.99 (0.90-1.09) | 0.93 (0.86-1.01) | 1.00 (0.93-1.06) | 0.99 (0.92-1.06) |
| <b>Europe</b> | <b>Czech Republic</b> | <b>Aged 0-64</b> | 0.92 (0.88-0.98) | 0.99 (0.95-1.03) | 0.92 (0.77-1.11) | 1.02 (0.93-1.12) | 1.02 (0.96-1.08) |
| <b>Europe</b> | <b>Estonia</b>        | <b>Total</b>     | 0.94 (0.91-0.98) | 0.99 (0.96-1.02) | 0.89 (0.75-1.07) | 1.04 (0.98-1.11) | 1.02 (0.95-1.09) |
| <b>Europe</b> | <b>Estonia</b>        | <b>Male</b>      | 0.92 (0.88-0.97) | 1.00 (0.96-1.04) | 0.85 (0.67-1.07) | 1.05 (0.96-1.14) | 1.04 (0.98-1.10) |
| <b>Europe</b> | <b>Estonia</b>        | <b>Female</b>    | 0.99 (0.90-1.09) | 0.98 (0.88-1.09) | 0.92 (0.84-1.01) | 0.97 (0.89-1.05) | 0.99 (0.91-1.08) |
| <b>Europe</b> | <b>Estonia</b>        | <b>Aged 0-64</b> | 0.92 (0.88-0.97) | 0.99 (0.95-1.03) | 0.92 (0.77-1.09) | 1.02 (0.93-1.11) | 1.02 (0.96-1.08) |
| <b>Europe</b> | <b>Finland</b>        | <b>Total</b>     | 0.96 (0.93-0.99) | 1.00 (0.97-1.03) | 1.06 (0.97-1.16) | 1.07 (1.01-1.13) | 1.08 (1.04-1.13) |
| <b>Europe</b> | <b>Finland</b>        | <b>Male</b>      | 0.96 (0.92-1.00) | 0.99 (0.95-1.03) | 1.08 (0.97-1.22) | 1.08 (1.02-1.16) | 1.09 (1.05-1.14) |
| <b>Europe</b> | <b>Finland</b>        | <b>Female</b>    | 0.95 (0.88-1.02) | 1.00 (0.92-1.10) | 0.96 (0.89-1.04) | 1.06 (0.99-1.13) | 0.98 (0.92-1.06) |
| <b>Europe</b> | <b>Finland</b>        | <b>Aged 0-64</b> | 0.96 (0.92-1.00) | 1.01 (0.97-1.05) | 1.08 (0.98-1.18) | 1.06 (1.00-1.14) | 1.06 (1.02-1.11) |
| <b>Europe</b> | <b>Germany</b>        | <b>Total</b>     | 0.94 (0.91-0.97) | 0.99 (0.96-1.02) | 0.90 (0.76-1.06) | 1.04 (0.98-1.11) | 1.02 (0.96-1.09) |
| <b>Europe</b> | <b>Germany</b>        | <b>Male</b>      | 0.92 (0.88-0.97) | 1.00 (0.96-1.04) | 0.84 (0.68-1.04) | 1.03 (0.95-1.13) | 1.04 (0.98-1.10) |
| <b>Europe</b> | <b>Germany</b>        | <b>Female</b>    | 0.98 (0.90-1.06) | 0.99 (0.90-1.08) | 0.94 (0.87-1.01) | 1.00 (0.93-1.06) | 0.99 (0.92-1.06) |
| <b>Europe</b> | <b>Germany</b>        | <b>Aged 0-64</b> | 0.92 (0.87-0.97) | 0.99 (0.95-1.03) | 0.89 (0.76-1.06) | 1.01 (0.93-1.10) | 1.01 (0.95-1.07) |
| <b>Europe</b> | <b>Italy</b>          | <b>Total</b>     | 0.93 (0.90-0.97) | 0.99 (0.96-1.02) | 0.84 (0.71-1.01) | 1.04 (0.97-1.10) | 1.00 (0.93-1.07) |
| <b>Europe</b> | <b>Italy</b>          | <b>Male</b>      | 0.92 (0.87-0.96) | 1.00 (0.96-1.04) | 0.81 (0.64-1.02) | 1.04 (0.95-1.13) | 1.03 (0.97-1.09) |
| <b>Europe</b> | <b>Italy</b>          | <b>Female</b>    | 0.94 (0.87-1.02) | 0.99 (0.90-1.09) | 0.96 (0.89-1.04) | 1.05 (0.98-1.12) | 0.99 (0.92-1.07) |
| <b>Europe</b> | <b>Italy</b>          | <b>Aged 0-64</b> | 0.91 (0.87-0.96) | 0.99 (0.95-1.03) | 0.88 (0.73-1.05) | 1.00 (0.91-1.09) | 1.00 (0.95-1.06) |

|               |                    |                  |                  |                  |                  |                  |                  |
|---------------|--------------------|------------------|------------------|------------------|------------------|------------------|------------------|
| <b>Europe</b> | <b>Romania</b>     | <b>Total</b>     | 0.94 (0.91-0.98) | 0.99 (0.96-1.02) | 0.93 (0.80-1.07) | 1.04 (0.98-1.11) | 1.03 (0.97-1.10) |
| <b>Europe</b> | <b>Romania</b>     | <b>Male</b>      | 0.93 (0.89-0.97) | 1.00 (0.96-1.04) | 0.89 (0.74-1.07) | 1.05 (0.97-1.14) | 1.05 (1.00-1.11) |
| <b>Europe</b> | <b>Romania</b>     | <b>Female</b>    | 0.97 (0.90-1.05) | 0.99 (0.90-1.08) | 0.94 (0.88-1.01) | 1.01 (0.95-1.07) | 0.99 (0.92-1.06) |
| <b>Europe</b> | <b>Romania</b>     | <b>Aged 0-64</b> | 0.92 (0.88-0.97) | 0.99 (0.95-1.03) | 0.92 (0.80-1.07) | 1.02 (0.94-1.11) | 1.02 (0.97-1.07) |
| <b>Europe</b> | <b>Spain</b>       | <b>Total</b>     | 0.95 (0.92-0.98) | 0.99 (0.96-1.03) | 0.95 (0.85-1.05) | 1.06 (1.00-1.12) | 1.04 (0.99-1.09) |
| <b>Europe</b> | <b>Spain</b>       | <b>Male</b>      | 0.93 (0.90-0.97) | 0.99 (0.95-1.03) | 0.91 (0.80-1.03) | 1.07 (1.00-1.15) | 1.05 (1.00-1.10) |
| <b>Europe</b> | <b>Spain</b>       | <b>Female</b>    | 0.93 (0.86-1.01) | 0.98 (0.89-1.07) | 0.97 (0.90-1.05) | 1.05 (0.98-1.12) | 1.00 (0.93-1.07) |
| <b>Europe</b> | <b>Spain</b>       | <b>Aged 0-64</b> | 0.93 (0.89-0.97) | 0.99 (0.96-1.03) | 0.95 (0.85-1.06) | 1.05 (0.98-1.13) | 1.03 (0.98-1.07) |
| <b>Europe</b> | <b>Switzerland</b> | <b>Total</b>     | 0.94 (0.91-0.97) | 0.99 (0.96-1.02) | 0.91 (0.83-1.00) | 1.03 (0.97-1.08) | 1.03 (0.99-1.08) |
| <b>Europe</b> | <b>Switzerland</b> | <b>Male</b>      | 0.94 (0.90-0.98) | 1.00 (0.96-1.04) | 0.94 (0.84-1.06) | 1.04 (0.98-1.12) | 1.07 (1.02-1.11) |
| <b>Europe</b> | <b>Switzerland</b> | <b>Female</b>    | 0.99 (0.92-1.07) | 1.00 (0.92-1.09) | 0.93 (0.86-1.00) | 1.00 (0.94-1.07) | 0.98 (0.91-1.05) |
| <b>Europe</b> | <b>Switzerland</b> | <b>Aged 0-64</b> | 0.93 (0.89-0.97) | 1.00 (0.96-1.04) | 0.95 (0.86-1.05) | 1.01 (0.94-1.09) | 1.03 (0.98-1.07) |
| <b>Europe</b> | <b>UK</b>          | <b>Total</b>     | 0.93 (0.90-0.96) | 0.99 (0.95-1.02) | 0.80 (0.71-0.89) | 1.03 (0.97-1.09) | 0.98 (0.93-1.03) |
| <b>Europe</b> | <b>UK</b>          | <b>Male</b>      | 0.91 (0.87-0.95) | 1.00 (0.96-1.04) | 0.76 (0.66-0.87) | 1.03 (0.95-1.11) | 1.02 (0.97-1.06) |
| <b>Europe</b> | <b>UK</b>          | <b>Female</b>    | 0.97 (0.90-1.05) | 0.98 (0.90-1.08) | 0.94 (0.87-1.01) | 1.00 (0.94-1.07) | 0.99 (0.92-1.06) |
| <b>Europe</b> | <b>UK</b>          | <b>Aged 0-64</b> | 0.90 (0.86-0.94) | 0.98 (0.94-1.02) | 0.82 (0.73-0.92) | 0.98 (0.91-1.06) | 0.99 (0.94-1.03) |

**Table S9.** Meta-regression results on spatial heterogeneities of suicide risks by the day-of-the-week and holiday type. Cochran Q tests for heterogeneity (p-value), and I<sup>2</sup> statistics (%) in random-effects meta-regression models.

|                                |                         | Meta-regression model |         |                |                           |         |                |
|--------------------------------|-------------------------|-----------------------|---------|----------------|---------------------------|---------|----------------|
| Holiday type                   | Population              | Intercept-only        |         |                | Region indicator included |         |                |
|                                |                         | Q                     | p-value | I <sup>2</sup> | Q                         | p-value | I <sup>2</sup> |
| <b>The day-of-the-week</b>     | <b>Total</b>            | 1951.7                | <0.0001 | 92.3           | 787.1                     | <0.0001 | 84.8           |
|                                | <b>Male</b>             | 1651.1                | <0.0001 | 92.0           | 489.1                     | <0.0001 | 79.1           |
|                                | <b>Female</b>           | 569.3                 | <0.0001 | 76.8           | 327.3                     | <0.0001 | 70.7           |
|                                | <b>Aged 0-64</b>        | 2007.2                | <0.0001 | 93.4           | 535.6                     | <0.0001 | 81.0           |
|                                | <b>Aged 65 or older</b> | 435.4                 | <0.0001 | 69.7           | 293.9                     | <0.0001 | 65.3           |
| <b>Christmas</b>               | <b>Total</b>            | 273.4                 | <0.0001 | 54.3           | 146.3                     | 0.0018  | 31.7           |
|                                | <b>Male</b>             | 245.1                 | <0.0001 | 55.1           | 97.5                      | 0.1665  | 12.8           |
|                                | <b>Female</b>           | 114.6                 | 0.3626  | 4.0            | 74.5                      | 0.6529  | 1.0            |
|                                | <b>Aged 0-64</b>        | 223.9                 | <0.0001 | 50.9           | 101.2                     | 0.1114  | 16.0           |
| <b>New Year's Day</b>          | <b>Total</b>            | 350.6                 | <0.0001 | 64.3           | 150.9                     | 0.0008  | 33.7           |
|                                | <b>Male</b>             | 327.6                 | <0.0001 | 66.4           | 146.6                     | <0.0001 | 42.0           |
|                                | <b>Female</b>           | 118.0                 | 0.2832  | 6.8            | 62.5                      | 0.9256  | 1.0            |
|                                | <b>Aged 0-64</b>        | 325.9                 | <0.0001 | 66.2           | 136.0                     | 0.0004  | 37.5           |
| <b>Other national holidays</b> | <b>Total</b>            | 277.9                 | <0.0001 | 55.0           | 170.0                     | <0.0001 | 41.2           |
|                                | <b>Male</b>             | 288.2                 | <0.0001 | 61.8           | 160.5                     | <0.0001 | 47.0           |
|                                | <b>Female</b>           | 131.6                 | 0.0787  | 16.4           | 86.0                      | 0.3029  | 7.0            |
|                                | <b>Aged 0-64</b>        | 279.9                 | <0.0001 | 60.7           | 143.0                     | 0.0001  | 40.5           |

**Table S10.** Multivariate meta-regression results on spatial heterogeneities of suicide risks by the day-of-the-week. The tau ( $\tau$ ) for heterogeneity and the correlation matrix in random-effects meta-regression models.

| Multivariate meta-regression model |                   |                    |         |         |        |        |                           |                    |            |         |         |         |        |
|------------------------------------|-------------------|--------------------|---------|---------|--------|--------|---------------------------|--------------------|------------|---------|---------|---------|--------|
| Population                         | Intercept-only    |                    |         |         |        |        | Region indicator included |                    |            |         |         |         |        |
|                                    | tau<br>( $\tau$ ) | Correlation matrix |         |         |        |        | tau<br>( $\tau$ )         | Correlation matrix |            |         |         |         |        |
|                                    |                   | Tue                | Thu     | Fri     | Sat    | Sun    |                           | Tue                | Thu        | Fri     | Sat     | Sun     |        |
| <b>Total</b>                       | 0.0222            | <b>Mon</b>         |         |         |        |        | 0.0319                    | <b>Mon</b>         |            |         |         |         |        |
|                                    | 0.0097            | <b>Tue</b>         | -0.8688 |         |        |        | 0.0069                    | <b>Tue</b>         | -0.8910    |         |         |         |        |
|                                    | 0.0130            | <b>Tur</b>         | 0.2287  | -0.6698 |        |        | 0.0047                    | <b>Tur</b>         | -0.5519    | 0.1140  |         |         |        |
|                                    | 0.0190            | <b>Fri</b>         | -0.3634 | -0.0754 | 0.5685 |        | 0.0178                    | <b>Fri</b>         | -0.5226    | 0.0786  | 0.9985  |         |        |
|                                    | 0.1238            | <b>Sat</b>         | 0.0402  | -0.4459 | 0.7710 | 0.6779 | 0.1018                    | <b>Sat</b>         | -0.0737    | -0.2282 | 0.5405  | 0.5833  |        |
|                                    | 0.1587            | <b>Sun</b>         | 0.3337  | -0.6943 | 0.8692 | 0.4602 | 0.9312                    | 0.1168             | <b>Sun</b> | 0.3044  | -0.5124 | 0.2336  | 0.2864 |
| <b>Male</b>                        | 0.0203            | <b>Mon</b>         |         |         |        |        | 0.0255                    | <b>Mon</b>         |            |         |         |         |        |
|                                    | 0.0159            | <b>Tue</b>         | -0.7560 |         |        |        | 0.013                     | <b>Tue</b>         | 0.1700     |         |         |         |        |
|                                    | 0.0147            | <b>Tur</b>         | -0.0722 | -0.3225 |        |        | 0.0146                    | <b>Tur</b>         | -0.1853    | 0.6950  |         |         |        |
|                                    | 0.0247            | <b>Fri</b>         | -0.2766 | -0.0753 | 0.7253 |        | 0.0144                    | <b>Fri</b>         | -0.4957    | -0.3453 | 0.4340  |         |        |
|                                    | 0.1324            | <b>Sat</b>         | -0.0319 | -0.5823 | 0.6879 | 0.7269 | 0.1008                    | <b>Sat</b>         | -0.7651    | -0.7637 | -0.3101 | 0.5777  |        |
|                                    | 0.1642            | <b>Sun</b>         | 0.2796  | -0.8256 | 0.6795 | 0.4760 | 0.9152                    | 0.0859             | <b>Sun</b> | -0.6939 | -0.8274 | -0.4112 | 0.5232 |
| <b>Female</b>                      | 0.0272            | <b>Mon</b>         |         |         |        |        | 0.0276                    | <b>Mon</b>         |            |         |         |         |        |
|                                    | 0.0248            | <b>Tue</b>         | -0.0101 |         |        |        | 0.0249                    | <b>Tue</b>         | -0.6511    |         |         |         |        |
|                                    | 0.0146            | <b>Tur</b>         | 0.3406  | 0.3630  |        |        | 0.013                     | <b>Tur</b>         | -0.3006    | 0.8241  |         |         |        |
|                                    | 0.0237            | <b>Fri</b>         | -0.1349 | 0.6496  | 0.8405 |        | 0.0252                    | <b>Fri</b>         | 0.1789     | 0.6032  | 0.8556  |         |        |
|                                    | 0.1321            | <b>Sat</b>         | 0.5809  | 0.6663  | 0.8417 | 0.7014 | 0.1217                    | <b>Sat</b>         | 0.3072     | 0.5223  | 0.6958  | 0.9574  |        |
|                                    | 0.1754            | <b>Sun</b>         | 0.7578  | 0.4737  | 0.8159 | 0.5399 | 0.9660                    | 0.1422             | <b>Sun</b> | 0.6008  | 0.2154  | 0.4727  | 0.8606 |
| <b>Aged 0-64</b>                   | 0.0230            | <b>Mon</b>         |         |         |        |        | 0.0211                    | <b>Mon</b>         |            |         |         |         |        |
|                                    | 0.0097            | <b>Tue</b>         | -0.8206 |         |        |        | 0.0037                    | <b>Tue</b>         | -0.9999    |         |         |         |        |
|                                    | 0.0189            | <b>Tur</b>         | 0.6019  | -0.2248 |        |        | 0.0132                    | <b>Tur</b>         | -0.3932    | 0.3900  |         |         |        |
|                                    | 0.0265            | <b>Fri</b>         | 0.0016  | 0.1899  | 0.6528 |        | 0.0232                    | <b>Fri</b>         | -0.3695    | 0.3555  | 0.6206  |         |        |

|                         |        |            |        |         |        |        |        |        |            |         |        |         |        |        |
|-------------------------|--------|------------|--------|---------|--------|--------|--------|--------|------------|---------|--------|---------|--------|--------|
|                         | 0.1387 | <b>Sat</b> | 0.3378 | -0.3419 | 0.7523 | 0.6984 |        | 0.1176 | <b>Sat</b> | -0.2572 | 0.2442 | -0.2176 | 0.6124 |        |
|                         | 0.1810 | <b>Sun</b> | 0.6124 | -0.5365 | 0.8425 | 0.5080 | 0.9354 | 0.1099 | <b>Sun</b> | -0.0985 | 0.0857 | -0.3424 | 0.5207 | 0.9851 |
| <b>Aged 65 or older</b> | 0.0656 | <b>Mon</b> |        |         |        |        |        | 0.07   | <b>Mon</b> |         |        |         |        |        |
|                         | 0.0286 | <b>Tue</b> | 0.8970 |         |        |        |        | 0.0335 | <b>Tue</b> | 0.8491  |        |         |        |        |
|                         | 0.0234 | <b>Tur</b> | 0.9396 | 0.9374  |        |        |        | 0.0347 | <b>Tur</b> | 0.9599  | 0.9568 |         |        |        |
|                         | 0.0174 | <b>Fri</b> | 0.8350 | 0.7464  | 0.9303 |        |        | 0.0256 | <b>Fri</b> | 0.9781  | 0.8549 | 0.9348  |        |        |
|                         | 0.0989 | <b>Sat</b> | 0.0974 | 0.3066  | 0.4281 | 0.5531 |        | 0.0945 | <b>Sat</b> | 0.1776  | 0.3305 | 0.1869  | 0.3768 |        |
|                         | 0.1297 | <b>Sun</b> | 0.2978 | 0.4760  | 0.6025 | 0.7022 | 0.9791 | 0.139  | <b>Sun</b> | 0.4770  | 0.5938 | 0.4887  | 0.6460 | 0.9478 |



**Table S11.** Multivariate meta-regression results on spatial heterogeneities of suicide risks by the Christmas. The tau for heterogeneity and the correlation matrix in random-effects meta-regression models.

| Multivariate meta-regression model |                   |                    |         |         |        |                   |                           |               |         |         |         |
|------------------------------------|-------------------|--------------------|---------|---------|--------|-------------------|---------------------------|---------------|---------|---------|---------|
| Population                         | Intercept-only    |                    |         |         |        |                   | Region indicator included |               |         |         |         |
|                                    | tau<br>( $\tau$ ) | Correlation matrix |         |         |        | tau<br>( $\tau$ ) | Correlation matrix        |               |         |         |         |
|                                    |                   | Day -1             | Day 0   | Day +1  | Day +2 |                   | Day -1                    | Day 0         | Day +1  | Day +2  |         |
| <b>Total</b>                       | 0.1030            | <b>Day -2</b>      |         |         |        |                   | 0.0571                    | <b>Day -2</b> |         |         |         |
|                                    | 0.1078            | <b>Day -1</b>      | 0.8482  |         |        |                   | 0.1077                    | <b>Day -1</b> | 0.2323  |         |         |
|                                    | 0.3464            | <b>Day 0</b>       | 0.8897  | 0.9504  |        |                   | 0.2683                    | <b>Day 0</b>  | 0.4104  | 0.8832  |         |
|                                    | 0.1096            | <b>Day +1</b>      | 0.3763  | 0.7593  | 0.7517 |                   | 0.1137                    | <b>Day +1</b> | -0.8156 | 0.3511  | 0.1829  |
|                                    | 0.1123            | <b>Day +2</b>      | 0.0819  | 0.5972  | 0.4470 | 0.8679            | 0.1050                    | <b>Day +2</b> | -0.6316 | 0.4738  | 0.0731  |
| <b>Male</b>                        | 0.0928            | <b>Day -2</b>      |         |         |        |                   | 0.0353                    | <b>Day -2</b> |         |         |         |
|                                    | 0.1159            | <b>Day -1</b>      | 0.8793  |         |        |                   | 0.0684                    | <b>Day -1</b> | 0.4496  |         |         |
|                                    | 0.3840            | <b>Day 0</b>       | 0.9395  | 0.9111  |        |                   | 0.1914                    | <b>Day 0</b>  | 0.3126  | 0.8612  |         |
|                                    | 0.1047            | <b>Day +1</b>      | 0.4185  | 0.6553  | 0.6994 |                   | 0.1186                    | <b>Day +1</b> | -0.9564 | -0.1731 | -0.0926 |
|                                    | 0.1232            | <b>Day +2</b>      | 0.3358  | 0.7076  | 0.5786 | 0.9148            | 0.1032                    | <b>Day +2</b> | -0.8145 | -0.0708 | -0.2268 |
| <b>Female</b>                      | 0.0468            | <b>Day -2</b>      |         |         |        |                   | 0.0431                    | <b>Day -2</b> |         |         |         |
|                                    | 0.2562            | <b>Day -1</b>      | -0.1957 |         |        |                   | 0.0951                    | <b>Day -1</b> | -0.8722 |         |         |
|                                    | 0.2297            | <b>Day 0</b>       | 0.3155  | 0.7131  |        |                   | 0.3009                    | <b>Day 0</b>  | -0.1811 | 0.6387  |         |
|                                    | 0.1547            | <b>Day +1</b>      | 0.5700  | -0.0876 | 0.6308 |                   | 0.1762                    | <b>Day +1</b> | 0.0429  | 0.4508  | 0.9748  |
|                                    | 0.1516            | <b>Day +2</b>      | 0.3243  | 0.0811  | 0.7099 | 0.9558            | 0.1613                    | <b>Day +2</b> | -0.3300 | 0.7493  | 0.9881  |
| <b>Aged 0-64</b>                   | 0.1075            | <b>Day -2</b>      |         |         |        |                   | 0.0705                    | <b>Day -2</b> |         |         |         |
|                                    | 0.0916            | <b>Day -1</b>      | 0.7062  |         |        |                   | 0.0953                    | <b>Day -1</b> | -0.2900 |         |         |
|                                    | 0.3522            | <b>Day 0</b>       | 0.9673  | 0.8628  |        |                   | 0.2247                    | <b>Day 0</b>  | 0.1929  | 0.7881  |         |
|                                    | 0.0966            | <b>Day +1</b>      | 0.9047  | 0.9405  | 0.9832 |                   | 0.0915                    | <b>Day +1</b> | -0.8644 | 0.3475  | 0.1343  |
|                                    | 0.1197            | <b>Day +2</b>      | 0.5837  | 0.9871  | 0.7707 | 0.8740            | 0.0678                    | <b>Day +2</b> | -0.7938 | 0.7639  | 0.2343  |

**Table S12.** Multivariate meta-regression results on spatial heterogeneities of suicide risks by the New Year’s Day. The tau for heterogeneity and the correlation matrix in random-effects meta-regression models.

| Multivariate meta-regression model |                   |                    |         |        |        |                   |                           |               |         |         |         |
|------------------------------------|-------------------|--------------------|---------|--------|--------|-------------------|---------------------------|---------------|---------|---------|---------|
| Population                         | Intercept-only    |                    |         |        |        |                   | Region indicator included |               |         |         |         |
|                                    | tau<br>( $\tau$ ) | Correlation matrix |         |        |        | tau<br>( $\tau$ ) | Correlation matrix        |               |         |         |         |
|                                    |                   | Day -1             | Day 0   | Day +1 | Day +2 |                   | Day -1                    | Day 0         | Day +1  | Day +2  |         |
| <b>Total</b>                       | 0.1281            | <b>Day -2</b>      |         |        |        |                   | 0.1021                    | <b>Day -2</b> |         |         |         |
|                                    | 0.0727            | <b>Day -1</b>      | 0.1899  |        |        |                   | 0.0920                    | <b>Day -1</b> | 0.6408  |         |         |
|                                    | 0.2377            | <b>Day 0</b>       | 0.5077  | 0.7937 |        |                   | 0.1834                    | <b>Day 0</b>  | 0.3618  | 0.8928  |         |
|                                    | 0.1519            | <b>Day +1</b>      | -0.1200 | 0.7751 | 0.2382 |                   | 0.0809                    | <b>Day +1</b> | 0.6493  | 0.1366  | 0.1601  |
|                                    | 0.0776            | <b>Day +2</b>      | 0.317   | 0.9913 | 0.8408 | 0.7252            | 0.0517                    | <b>Day +2</b> | 0.4784  | 0.7687  | 0.9199  |
| <b>Male</b>                        | 0.1023            | <b>Day -2</b>      |         |        |        |                   | 0.1086                    | <b>Day -2</b> |         |         |         |
|                                    | 0.1185            | <b>Day -1</b>      | -0.0621 |        |        |                   | 0.1097                    | <b>Day -1</b> | 0.5227  |         |         |
|                                    | 0.2475            | <b>Day 0</b>       | 0.3269  | 0.3387 |        |                   | 0.2402                    | <b>Day 0</b>  | 0.3483  | 0.2875  |         |
|                                    | 0.1818            | <b>Day +1</b>      | 0.1544  | 0.9700 | 0.3048 |                   | 0.1264                    | <b>Day +1</b> | 0.6763  | 0.9335  | 0.0573  |
|                                    | 0.0944            | <b>Day +2</b>      | 0.3231  | 0.5900 | 0.9569 | 0.5682            | 0.0913                    | <b>Day +2</b> | 0.3023  | 0.4146  | 0.9829  |
| <b>Female</b>                      | 0.1293            | <b>Day -2</b>      |         |        |        |                   | 0.1507                    | <b>Day -2</b> |         |         |         |
|                                    | 0.0577            | <b>Day -1</b>      | 0.1550  |        |        |                   | 0.0681                    | <b>Day -1</b> | -0.4991 |         |         |
|                                    | 0.1411            | <b>Day 0</b>       | 0.5708  | 0.8996 |        |                   | 0.1151                    | <b>Day 0</b>  | -0.5477 | -0.4517 |         |
|                                    | 0.0489            | <b>Day +1</b>      | 0.9355  | 0.4942 | 0.8242 |                   | 0.0449                    | <b>Day +1</b> | 0.6657  | -0.9789 | 0.2597  |
|                                    | 0.0648            | <b>Day +2</b>      | 0.9901  | 0.2925 | 0.6807 | 0.9759            | 0.0738                    | <b>Day +2</b> | 0.8392  | 0.0524  | -0.9146 |
| <b>Aged 0-64</b>                   | 0.1234            | <b>Day -2</b>      |         |        |        |                   | 0.1166                    | <b>Day -2</b> |         |         |         |
|                                    | 0.0693            | <b>Day -1</b>      | -0.0188 |        |        |                   | 0.1225                    | <b>Day -1</b> | 0.7514  |         |         |
|                                    | 0.2307            | <b>Day 0</b>       | 0.4109  | 0.5833 |        |                   | 0.1979                    | <b>Day 0</b>  | 0.4691  | 0.7287  |         |
|                                    | 0.1795            | <b>Day +1</b>      | -0.2111 | 0.8460 | 0.0667 |                   | 0.1001                    | <b>Day +1</b> | 0.7608  | 0.2092  | 0.2768  |
|                                    | 0.1139            | <b>Day +2</b>      | 0.1149  | 0.9817 | 0.7233 | 0.7369            | 0.0689                    | <b>Day +2</b> | 0.7141  | 0.6219  | 0.8728  |

**Table S13.** Multivariate meta-regression results on spatial heterogeneities of suicide risks by other national holidays. The tau for heterogeneity and the correlation matrix in random-effects meta-regression models.

| Multivariate meta-regression model |                   |                    |         |        |        |                   |                           |               |         |         |        |
|------------------------------------|-------------------|--------------------|---------|--------|--------|-------------------|---------------------------|---------------|---------|---------|--------|
| Population                         | Intercept-only    |                    |         |        |        |                   | Region indicator included |               |         |         |        |
|                                    | tau<br>( $\tau$ ) | Correlation matrix |         |        |        | tau<br>( $\tau$ ) | Correlation matrix        |               |         |         |        |
|                                    |                   | Day -1             | Day 0   | Day +1 | Day +2 |                   | Day -1                    | Day 0         | Day +1  | Day +2  |        |
| <b>Total</b>                       | 0.0047            | <b>Day -2</b>      |         |        |        |                   | 0.0098                    | <b>Day -2</b> |         |         |        |
|                                    | 0.0161            | <b>Day -1</b>      | 0.1862  |        |        |                   | 0.0057                    | <b>Day -1</b> | 0.7854  |         |        |
|                                    | 0.0912            | <b>Day 0</b>       | 0.0484  | 0.9904 |        |                   | 0.0900                    | <b>Day 0</b>  | 0.9385  | 0.5234  |        |
|                                    | 0.0239            | <b>Day +1</b>      | 0.9264  | 0.5426 | 0.4211 |                   | 0.0265                    | <b>Day +1</b> | 0.6032  | 0.9675  | 0.2907 |
|                                    | 0.0332            | <b>Day +2</b>      | -0.1391 | 0.9471 | 0.9824 | 0.2442            | 0.0329                    | <b>Day +2</b> | 0.8562  | 0.3526  | 0.9819 |
| <b>Male</b>                        | 0.0010            | <b>Day -2</b>      |         |        |        |                   | 0.0175                    | <b>Day -2</b> |         |         |        |
|                                    | 0.0157            | <b>Day -1</b>      | 0.6338  |        |        |                   | 0.0078                    | <b>Day -1</b> | -0.4939 |         |        |
|                                    | 0.1058            | <b>Day 0</b>       | 0.9015  | 0.9036 |        |                   | 0.1182                    | <b>Day 0</b>  | 0.9999  | -0.4815 |        |
|                                    | 0.0343            | <b>Day +1</b>      | 0.8605  | 0.1749 | 0.5792 |                   | 0.0377                    | <b>Day +1</b> | 0.4248  | -0.9970 | 0.4119 |
|                                    | 0.0337            | <b>Day +2</b>      | 0.7874  | 0.9757 | 0.9755 | 0.3855            | 0.0246                    | <b>Day +2</b> | 0.9417  | -0.1725 | 0.9464 |
| <b>Female</b>                      | 0.0171            | <b>Day -2</b>      |         |        |        |                   | 0.0274                    | <b>Day -2</b> |         |         |        |
|                                    | 0.0282            | <b>Day -1</b>      | 0.9999  |        |        |                   | 0.0305                    | <b>Day -1</b> | 0.8887  |         |        |
|                                    | 0.0604            | <b>Day 0</b>       | 0.1294  | 0.1421 |        |                   | 0.0256                    | <b>Day 0</b>  | -0.9984 | -0.8612 |        |
|                                    | 0.0144            | <b>Day +1</b>      | 1.0000  | 0.9998 | 0.1210 |                   | 0.0496                    | <b>Day +1</b> | -0.6935 | -0.2860 | 0.7334 |
|                                    | 0.0394            | <b>Day +2</b>      | -0.0050 | 0.0078 | 0.9909 | -0.0134           | 0.0189                    | <b>Day +2</b> | -0.1509 | -0.5873 | 0.0944 |
| <b>Aged 0-64</b>                   | 0.0057            | <b>Day -2</b>      |         |        |        |                   | 0.0186                    | <b>Day -2</b> |         |         |        |
|                                    | 0.0135            | <b>Day -1</b>      | 0.6803  |        |        |                   | 0.0093                    | <b>Day -1</b> | 0.8952  |         |        |
|                                    | 0.0917            | <b>Day 0</b>       | 0.8622  | 0.9578 |        |                   | 0.085                     | <b>Day 0</b>  | 0.9737  | 0.9732  |        |
|                                    | 0.0331            | <b>Day +1</b>      | 0.8439  | 0.1809 | 0.4559 |                   | 0.0384                    | <b>Day +1</b> | 0.6182  | 0.2032  | 0.4229 |
|                                    | 0.0272            | <b>Day +2</b>      | 0.8650  | 0.9562 | 1.000  | 0.4608            | 0.0240                    | <b>Day +2</b> | 0.9859  | 0.9572  | 0.9981 |

**Figure S1. Temporal variation in suicide risk by day-of-week and subgroup results by sexes.**

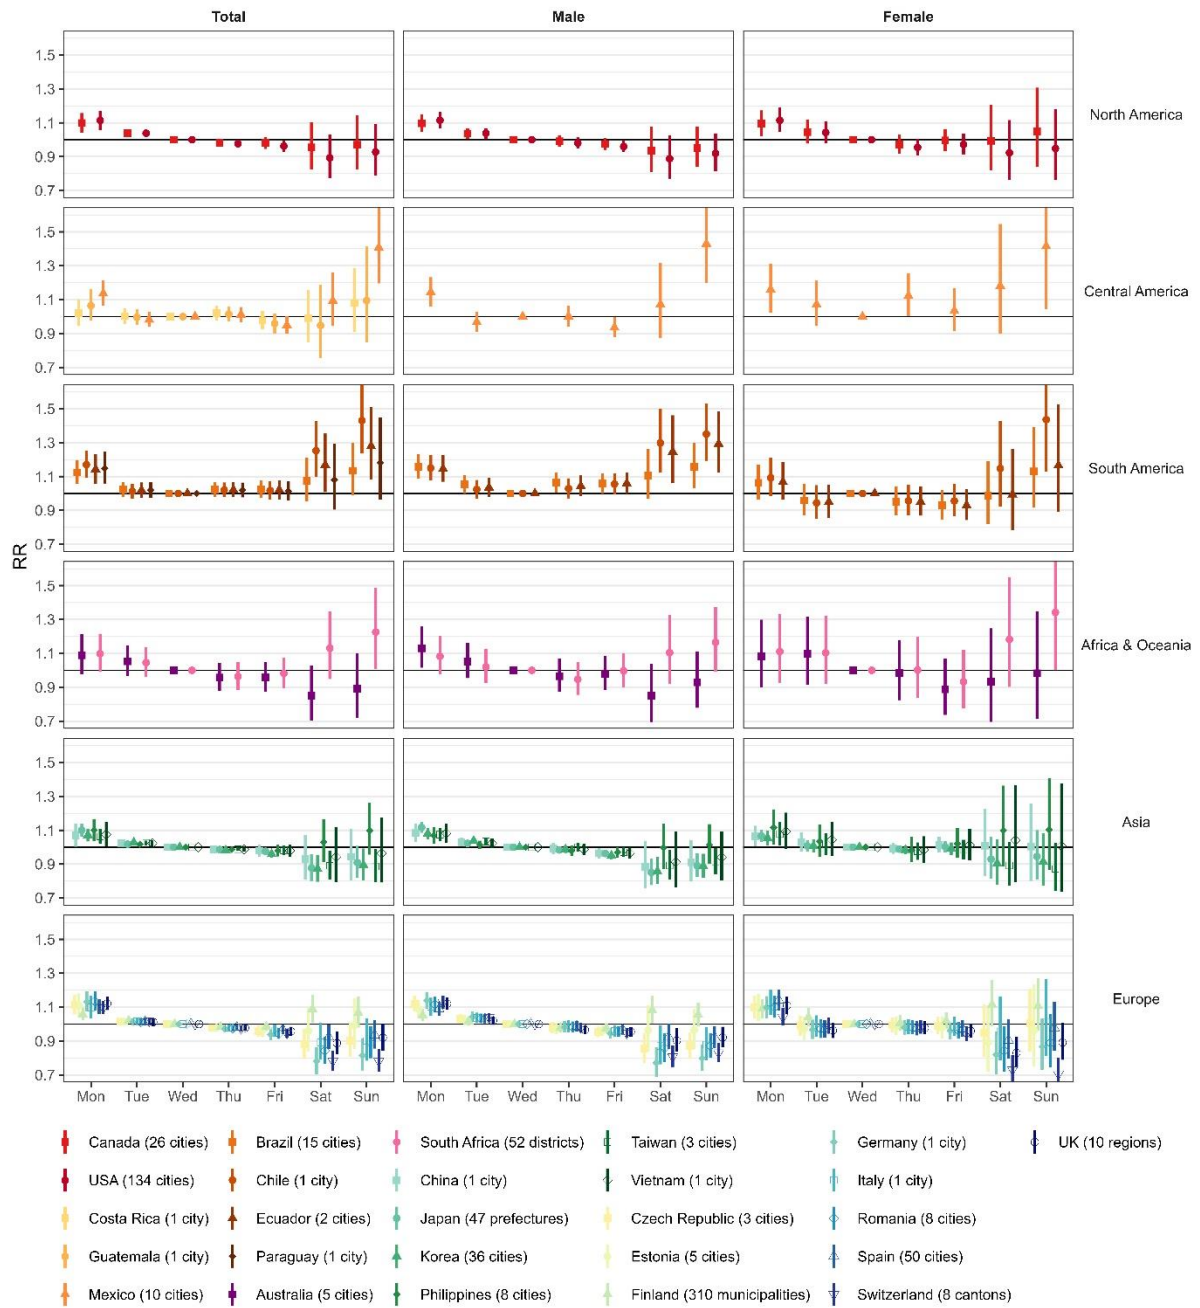

**Figure S2. Temporal variation in suicide risk by day-of-week and subgroup results by age groups.**

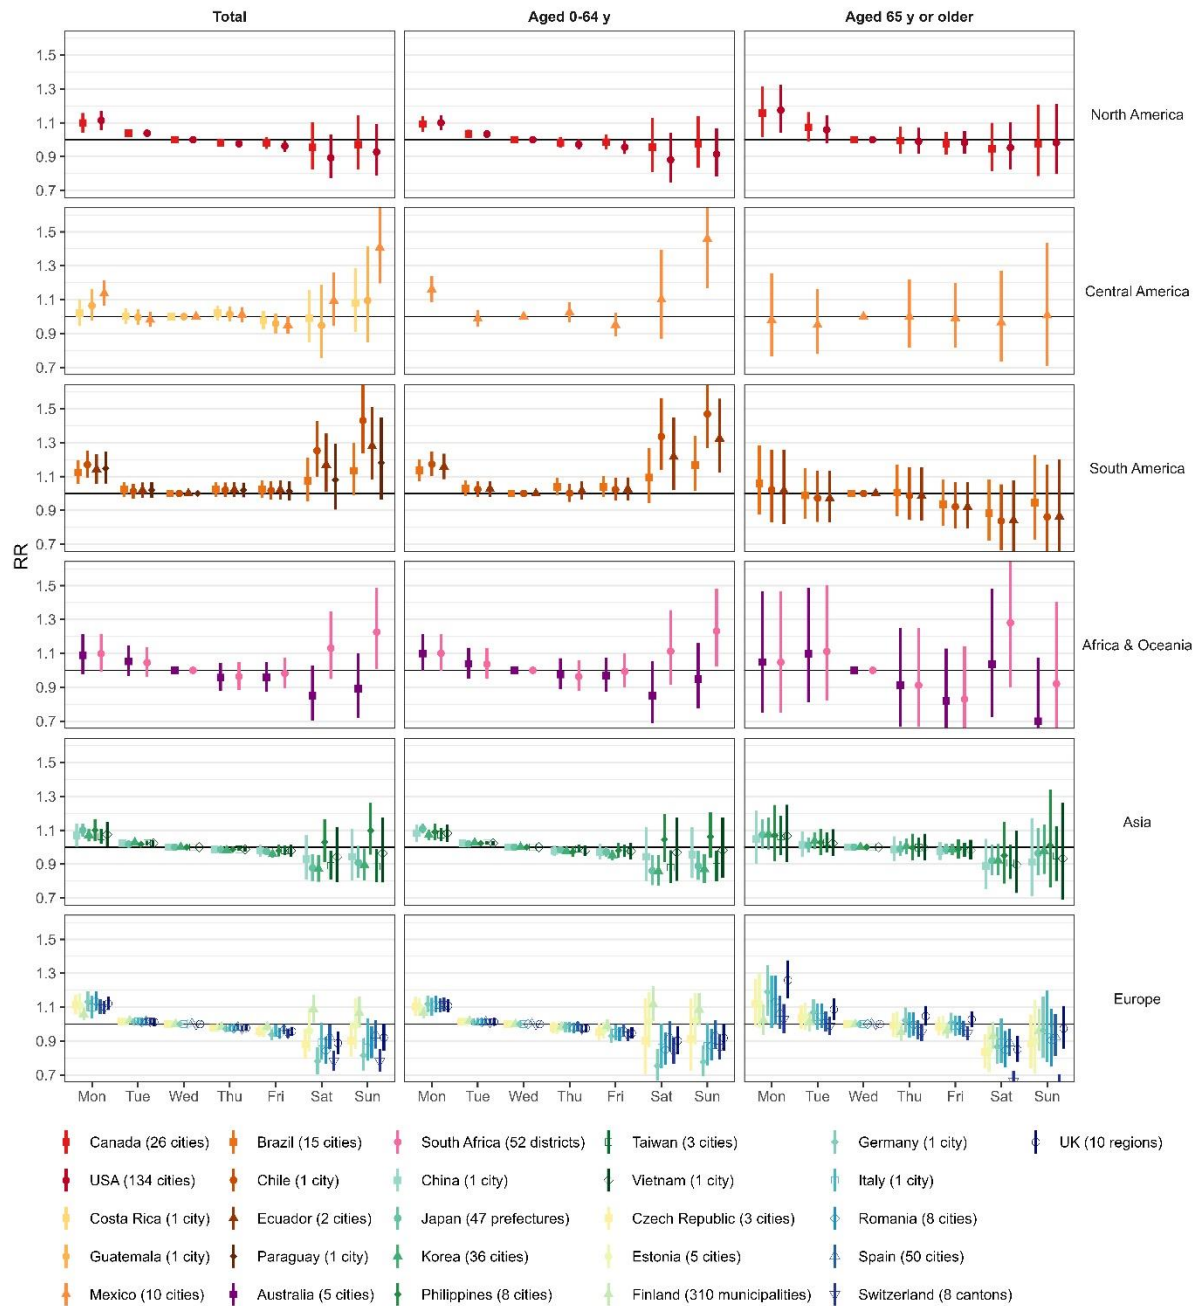

**Figure S3. Temporal variation in suicide risk during the Christmas holidays in the population aged 0-64 years and sexes.**

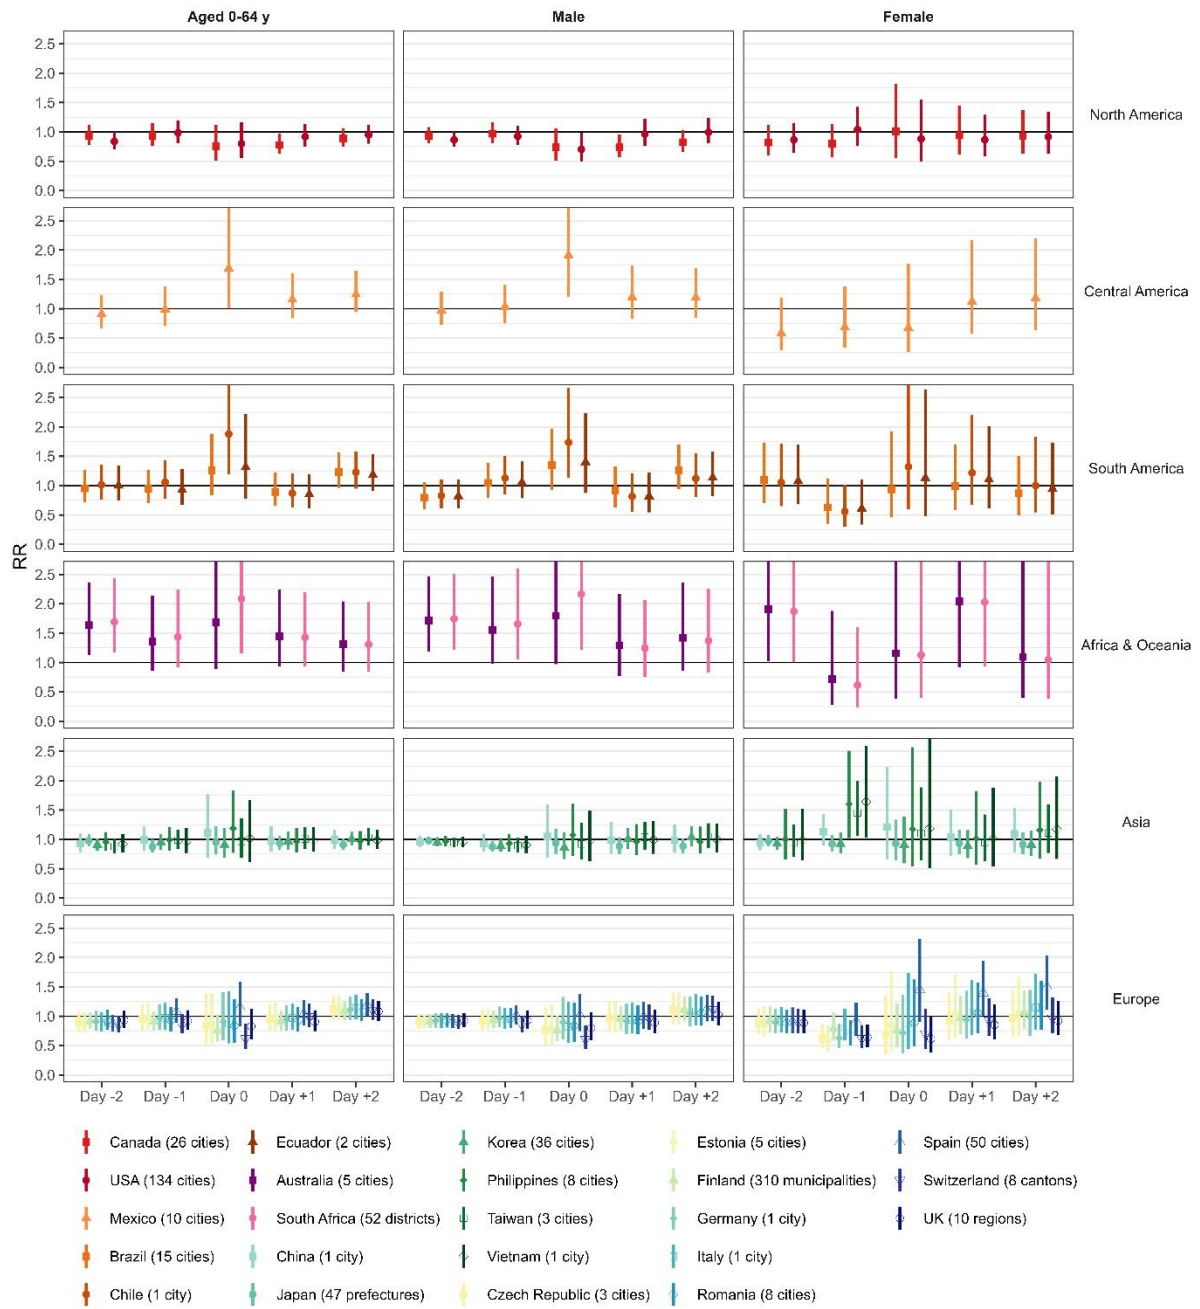

**Figure S4. Temporal variation in suicide risk during the New Year's Day holidays in the population aged 0-64 years and sexes.**

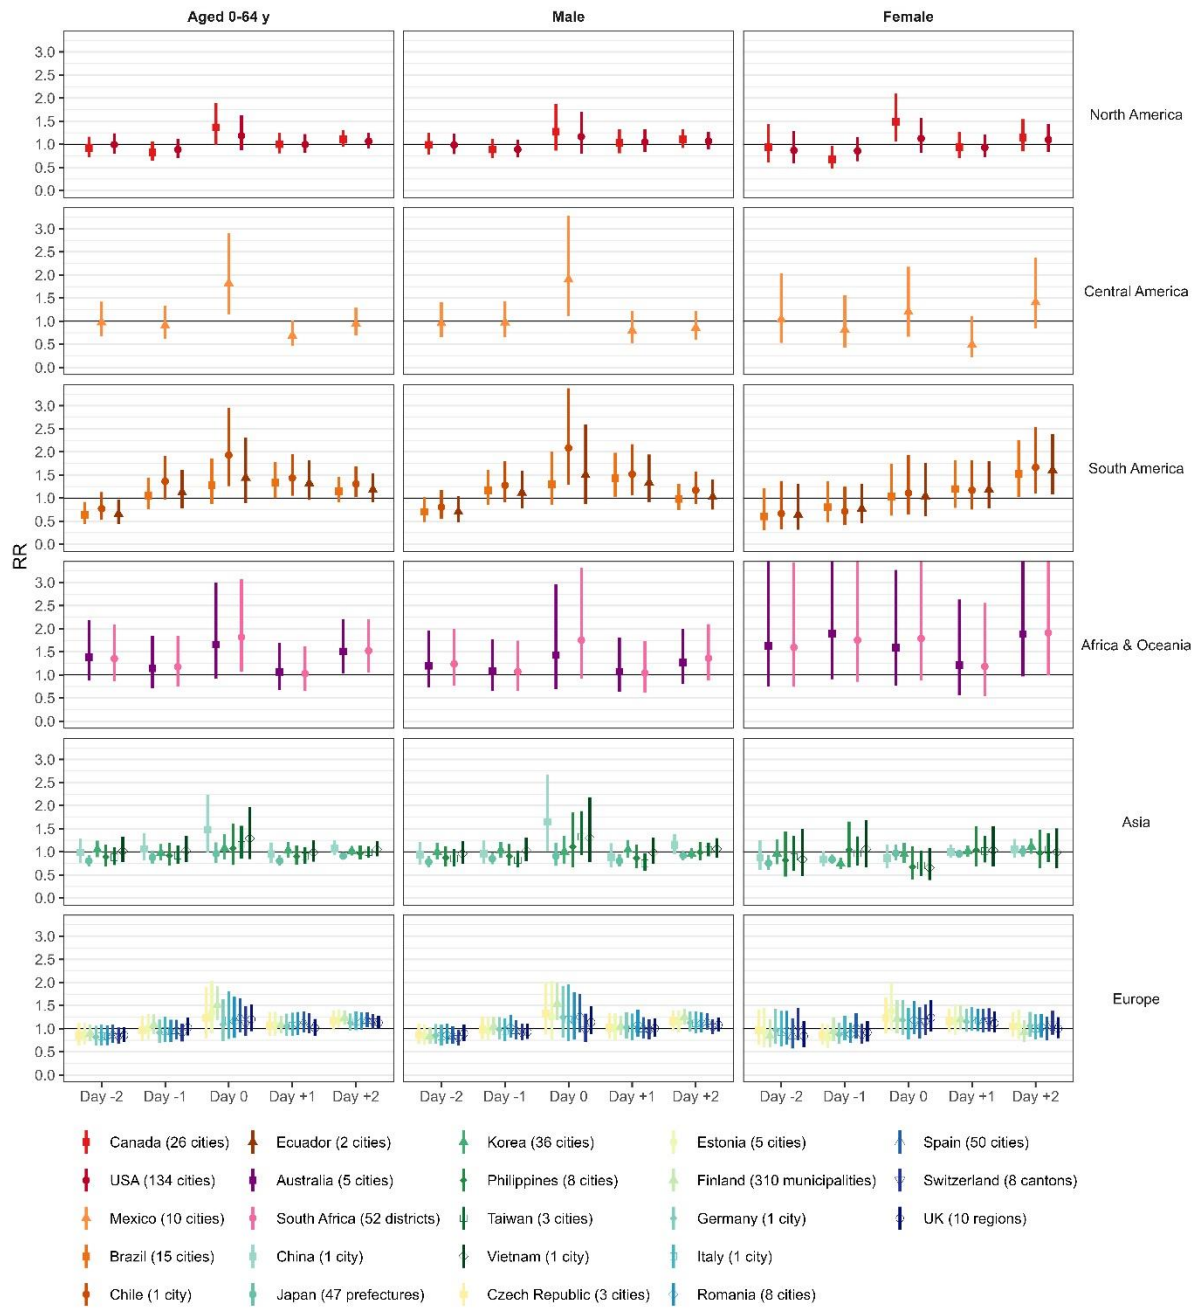

**Figure S5. Temporal variation in suicide risk during Luna New Year holidays in East Asian countries/regions (China, Korea, and Taiwan).**

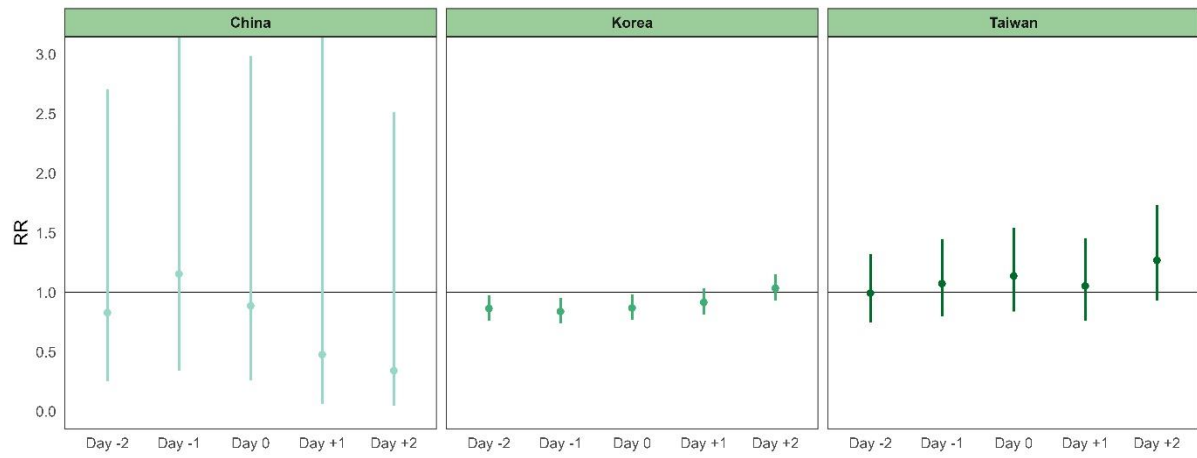



**Figure S6. Temporal variation in suicide risk during other national holidays (except for Christmas and New Year's Day) in the population aged 0-64 years and sexes.**

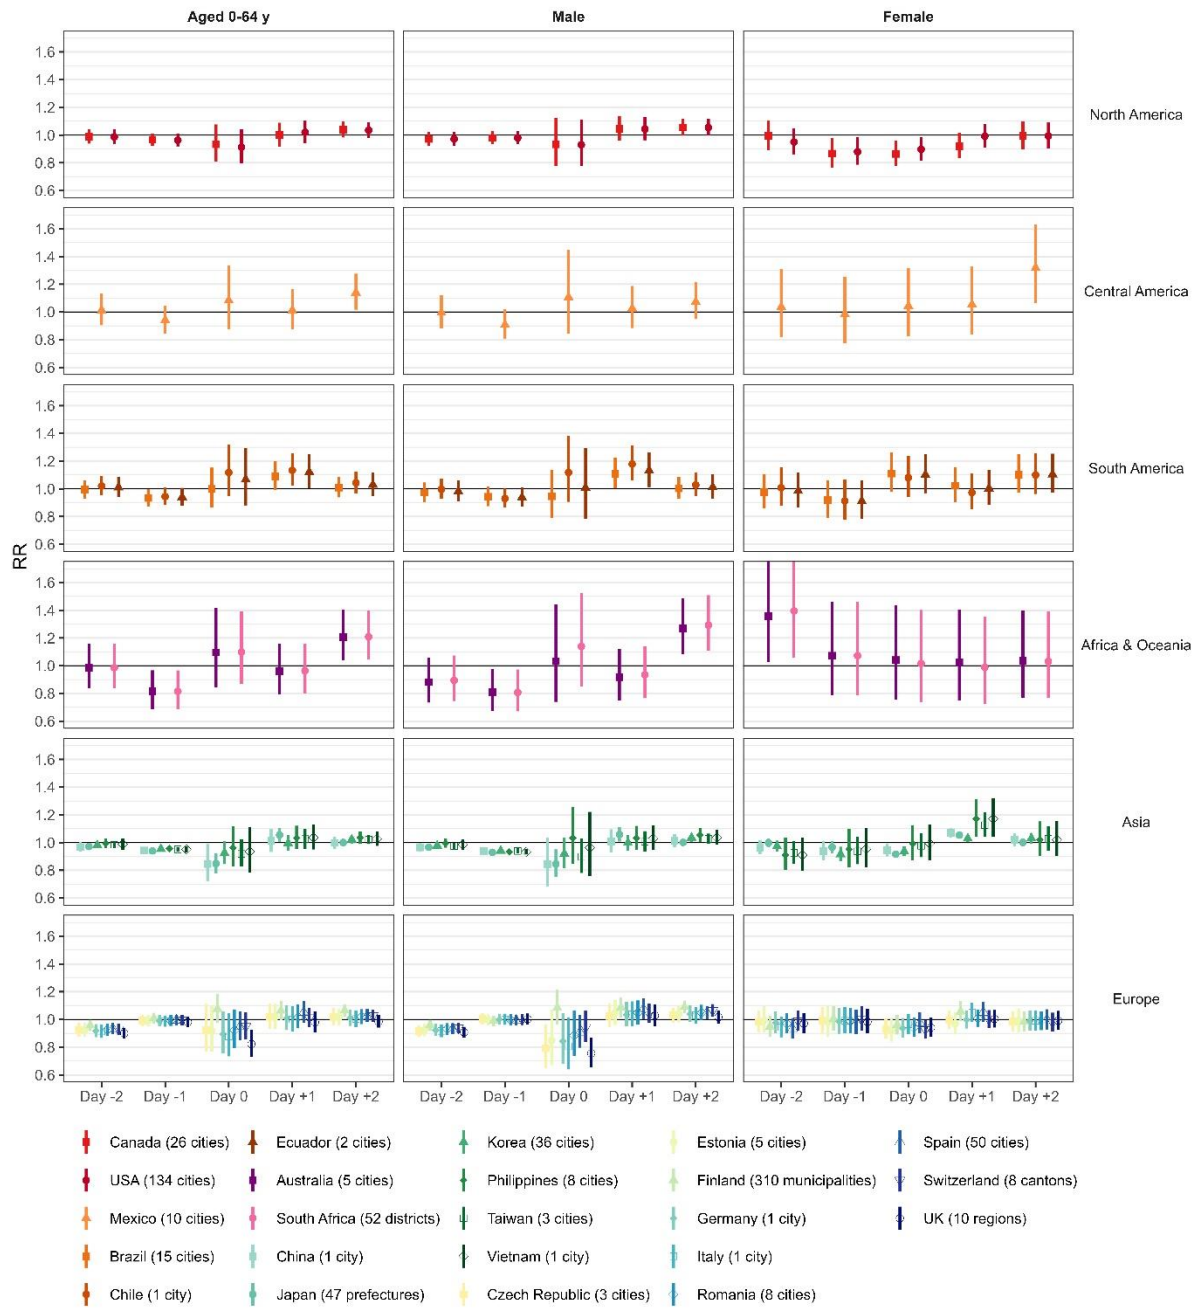

## **Simulation study for the misclassification on Monday**

We performed a simulation study as a sensitivity analysis to examine the potential misclassification biases due to administrative systems. This simulation study was constructed based on the total suicide counts that can partly address the potential misclassification on Monday that affects suicide counts during the previous weekends.

We first assumed that suicide counts on Monday could be over-counted because of the possibility that the mortality administrative system did not work during the weekends. To be specific, we generated three situations: 3%/5%/10% of suicide counts on Monday might include suicide counts during the weekends. Second, according to the assumptions, we decreased suicide counts on Mondays and increased suicide counts equally on Saturdays and Sundays prior to the corresponding Mondays. In other words, if we decreased six counts on a certain Monday, then we increased three suicide events on the previous Saturday and Sunday, respectively. We generated a total of three additional datasets reflecting these three assumptions (3%, 5%, and 10% over-counting on Mondays). Finally, we repeated our statistical analysis to check how our results on DOW are affected by the misclassification assumptions. Australian data were excluded from the simulation because we were not allowed to access their raw data for the simulation study.

The following figures report our main results (left) and results from the simulations (right). The results of the simulation study (Simulation study Figure 1 in the Supplementary Materials) show that 3% and 5% of misclassifications on Mondays do not evidently affect our main results that show the highest suicide risk on Mondays. However, when the misclassification ratio reached 10%, our main results with a peak on Mondays were affected considerably in the total population, and this pattern was prominent in countries in Central America and Asia which show relatively lower Monday risks (estimated RRs are less than around 1.1).

**Simulation study Figure 1.** Risks of suicide by the day-of-the week (a reference day: Wednesdays) with the corresponding 95% confidence intervals (vertical lines). Main results (left) and simulation study results (right).

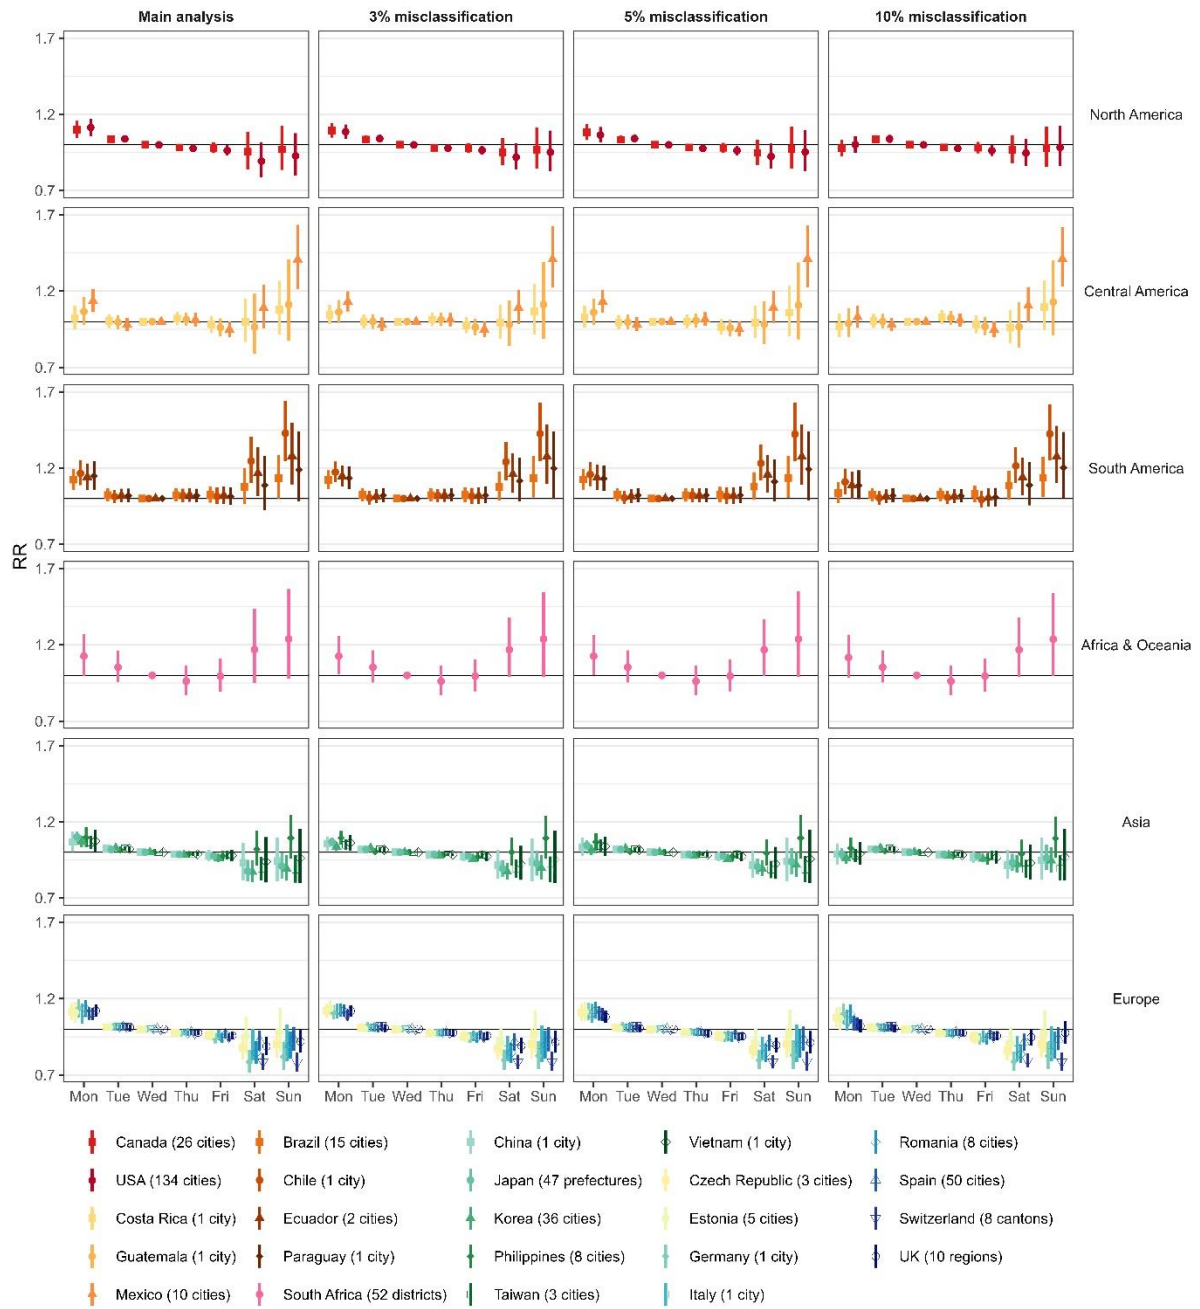

**Simulation study Figure 2.** Risks of suicide during Christmas season (reference days: non-holidays which are not included in New Year's Day, Christmas, and other national holidays that this study addressed). Main results (left) and simulation study results (right).

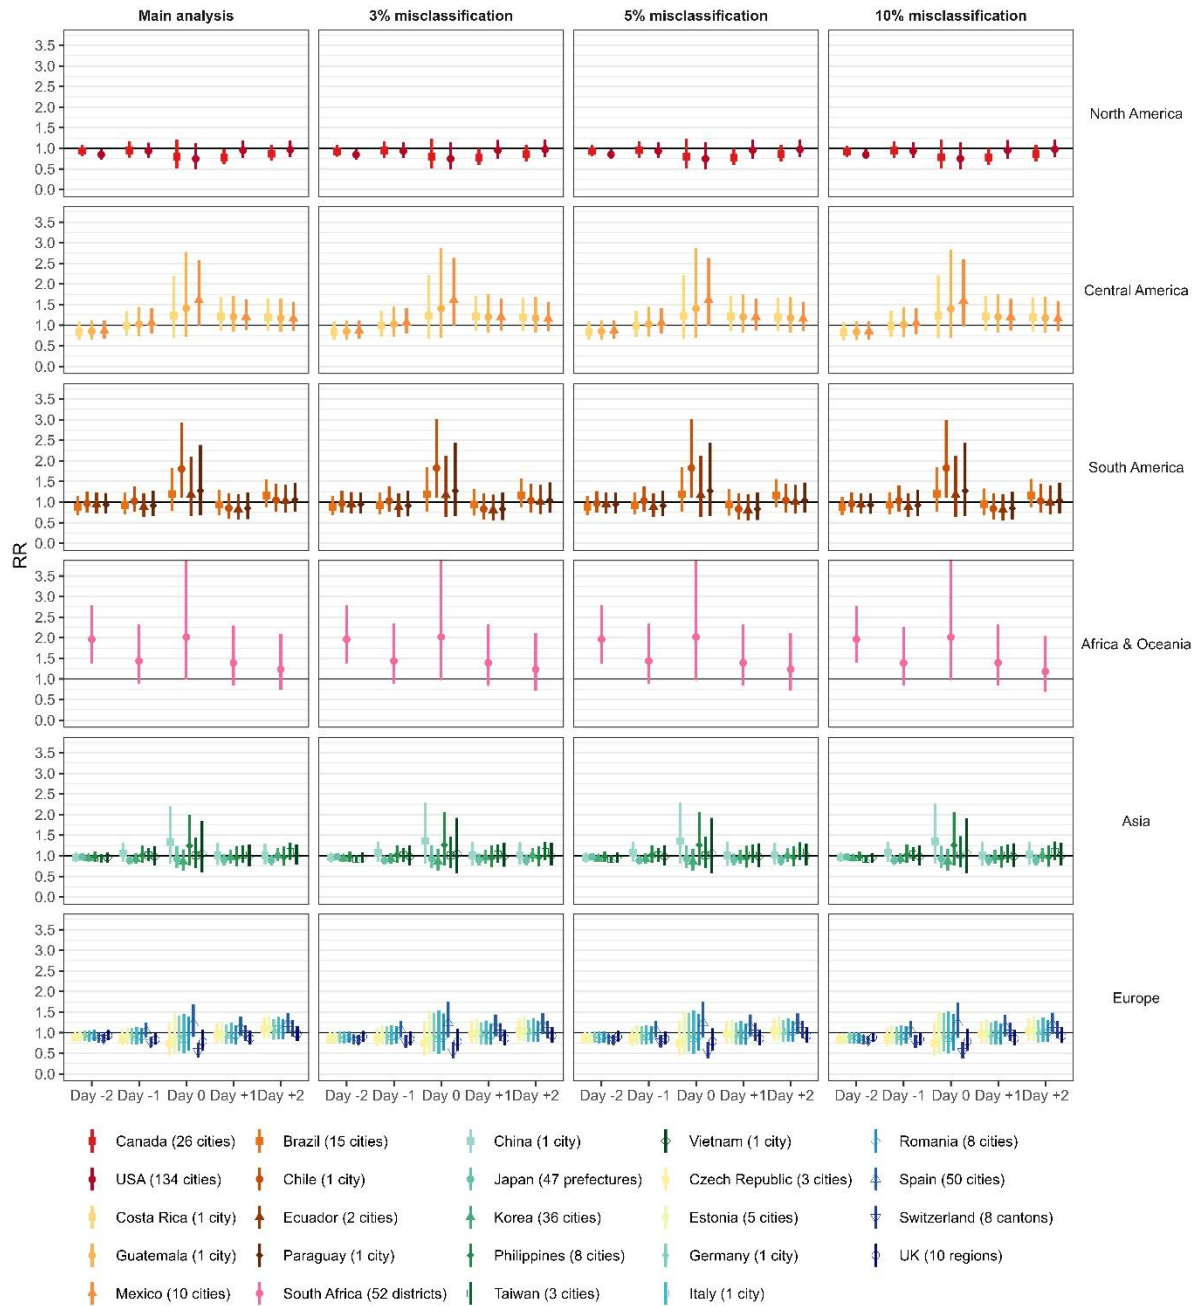

**Simulation study Figure 3.** Risks of suicide during New Year’s Day season (reference days: non-holidays which are not included in New Year’s Day, Christmas, and other national holidays that this study addressed) with the corresponding 95% confidence intervals (vertical lines). Main results (left) and simulation study results (right).

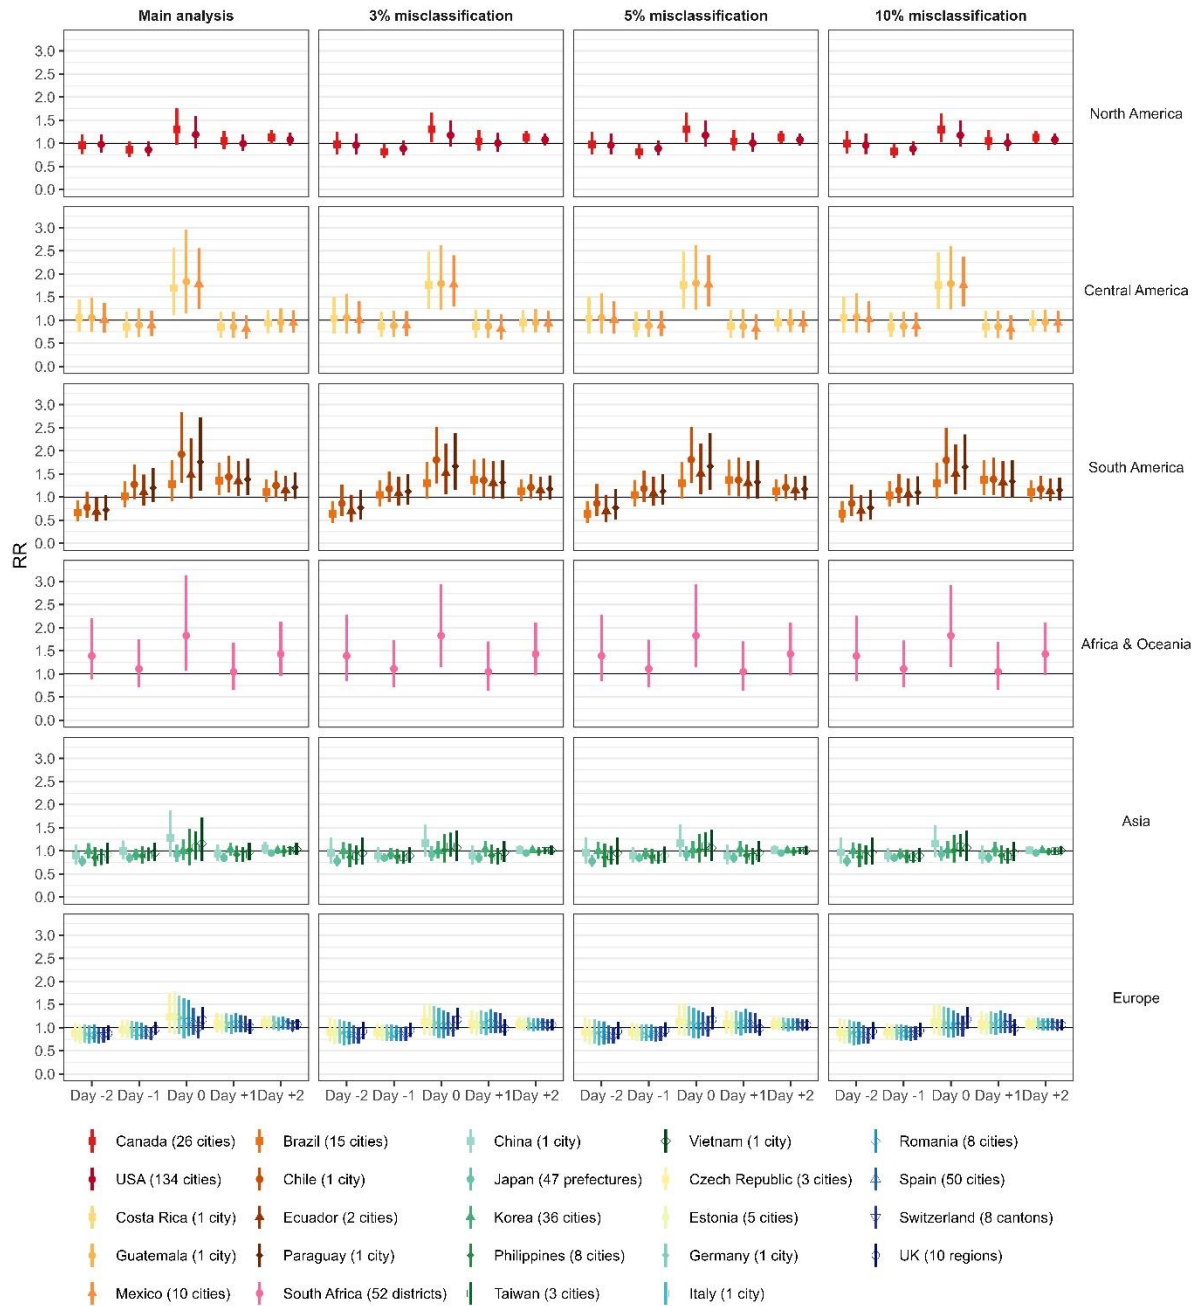

**Simulation study Figure 4.** Risks of suicide during other national holidays (except Christmas and New Year's Day) and neighboring days (reference days: non-holidays which are not included in New Year's Day, Christmas, and other national holidays that this study addressed) with the corresponding 95% confidence intervals (vertical lines). Main results (left) and simulation study results (right).

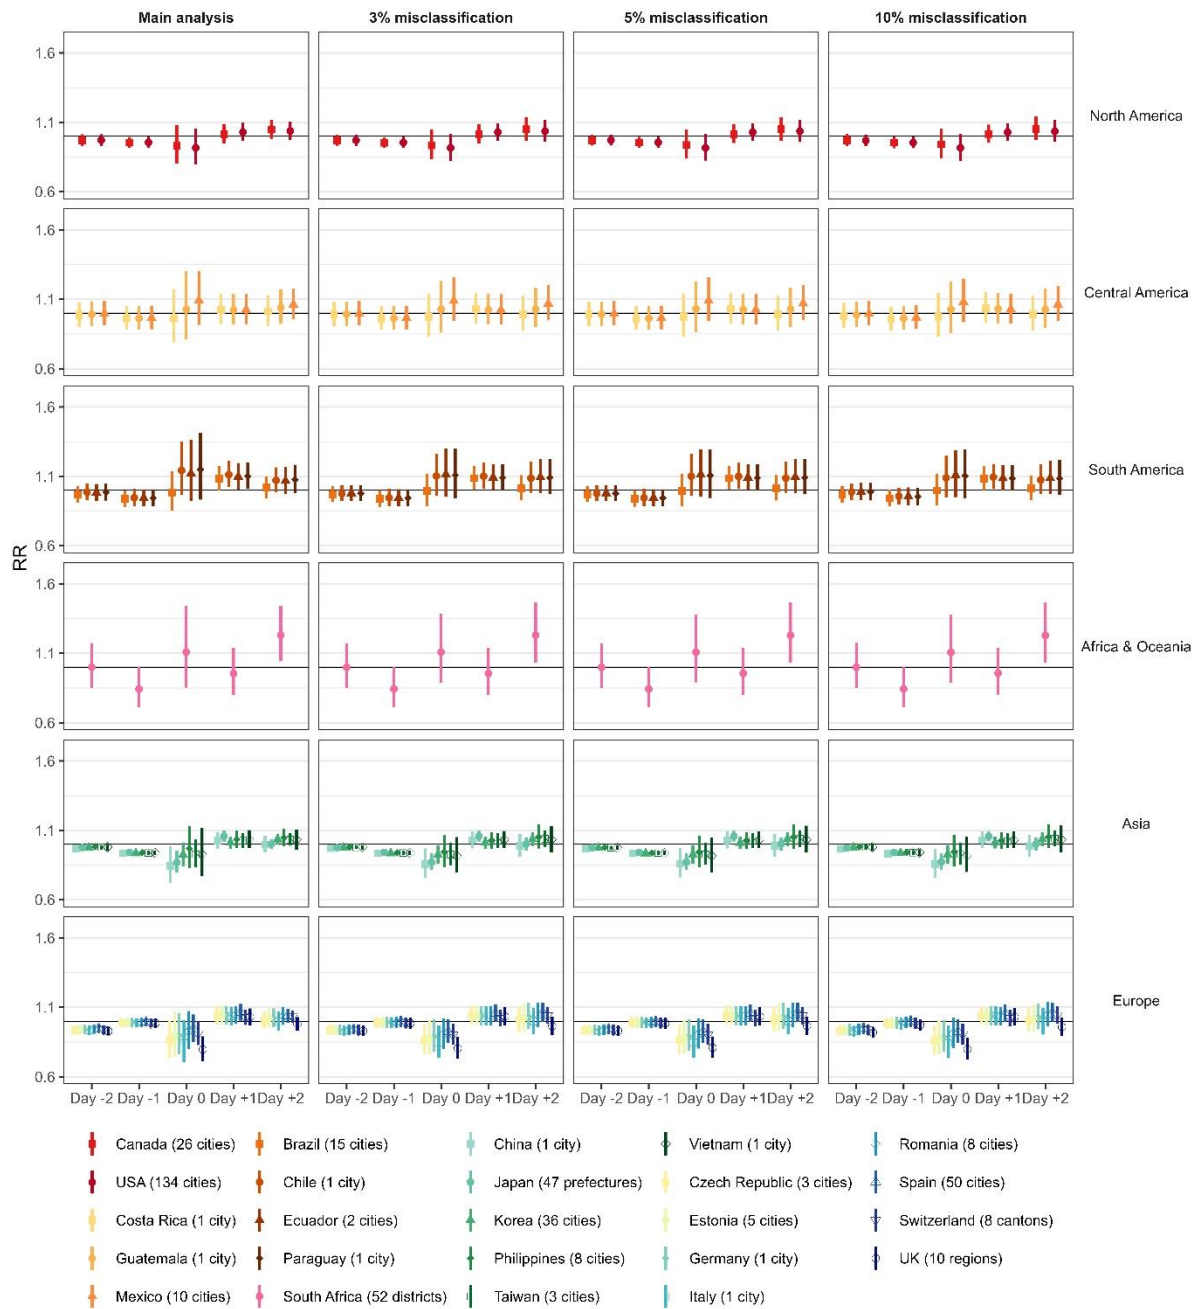

## Sensitivity analysis using the recent US mortality data

In order to consider the recent information on the US suicide data, we performed sensitivity analyses with the newly opened US mortality data (the National Vital Statistics Reports; URL: <https://www.cdc.gov/nchs/products/nvsr.htm>) from 1999 through 2019. However, this data does not include the “residential address” and “date of the death” of each death case. This data provides death year, month, and the day-of-the-death (Mon to Sun). Thus, although we did the same time-series regression analysis (compared to the main analysis) with the-day-of-the-week; however, because the recent US mortality data does not provide the residential address, the results from the data should be interpreted as the estimates that do not consider the confounding effects of daily ambient temperature. Also, this data does not include the “date”, we could not conduct sensitivity analyses regarding the public holidays, because we would link the holiday date to the death date. Further, because of the absence of the death date, we adjusted the seasonality and long-term trend using the year-month strata term (i.e. time-stratified model), instead of the spline method we used as the main methodology. The year-month strata method is a widely-used alternative method of the spline function, and it uses more parameters to capture the seasonal and long-term patterns compared to the spline method.<sup>3</sup>

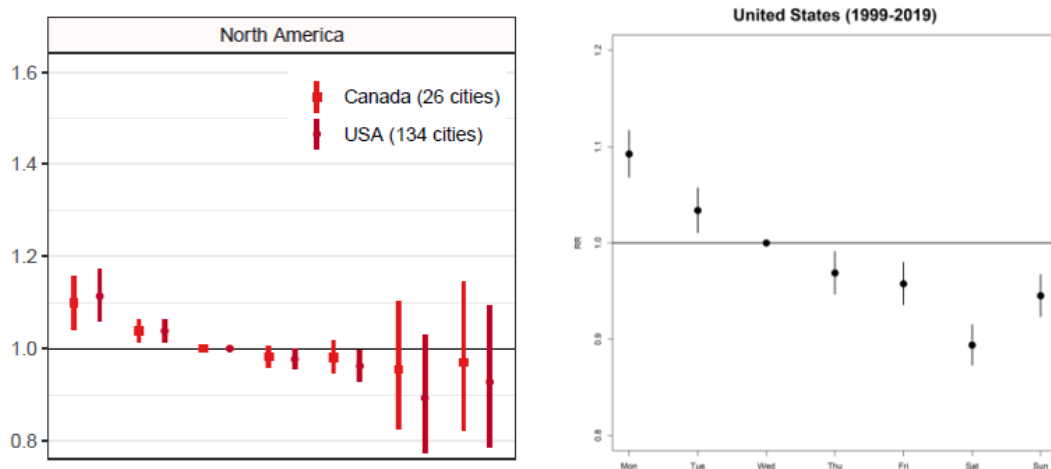

**Sensitivity analysis Figure 1.** Risks of suicide by the day-of-the-week (a reference day: Wednesdays) with the corresponding 95% confidence intervals in the United States: our main analysis with data (2001-2006, **left**) and the new data without residential address (1999-2019, **right**).

## References for the Supplementary Materials

1. Schwartz J. The distributed lag between air pollution and daily deaths. *Epidemiology* 2000;11(3):320-26.
2. Kim Y, Kim H, Gasparrini A, et al. Suicide and Ambient Temperature: A Multi-Country Multi-City Study. *Environmental health perspectives* 2019;127(11):117007-07. doi: 10.1289/EHP4898 [published Online First: 2019/11/26]
3. Bhaskaran K, Gasparrini A, Hajat S, et al. Time series regression studies in environmental epidemiology. *International Journal of Epidemiology* 2013;42(4):1187-95. doi: 10.1093/ije/dyt092
